# Supplementary material for: Aligning functional network constraint to evolutionary outcomes
Source: BMC Evol Biol. 2020 May 24;20:58. doi: 10.1186/s12862-020-01613-8 (PMC7245893; doi:10.1186/s12862-020-01613-8)
Supplement: Supplementary file 2 — Additional file 2. Data file. [file 12862_2020_1613_MOESM2_ESM.csv]

Schoenrock_ORF_ID	Schoenrock_dN	Schoenrock_dS	Schoenrock_Omega	Schoenrock_Omega_Boxcox	Schoenrock_nodedegree	Schoen_gamma	Schoen_gamma_Boxcox	Wall_ORF	Wall_CAI_Stand	Wall_CAI_Boxcox	Yeast_Interactome_ORF	Human Readable Label	AverageShortestPathLength	BetweennessCentrality	NeighborhoodConnectivity	NodehierarchyDFA	Nodehierarchy_DFA_withConvergentNodes
YAL058W	0.407	1.76084	0.23114	0.23114	2	0	0.644664705	YAL058W	-0.353003776	9.64699623	YAL058W	FUN48	2.51601543	0	3491	I	C
YBR294W	0.18942	2.44083	0.0776	0.0776	3	0					YBR294W	SUL1	3.17994298	0.00000612	65.5	P	C
YDR103W	0.36285	2.20158	0.16481	0.16481	28	3	0.65148346	YDR103W	-0.538620096	9.4613799	YDR103W	YDR103W	2.3461345	0.0000743	844.166667	I	C
YDR507C	0.14865	2.03328	0.07311	0.07311	150	32					YDR507C	GIN4	2.29615965	0.000177	743.227273	I	C
YEL036C	0.06277	1.72731	0.03634	0.03634	37	6	0.655265495	YEL036C	0.122638045	10.1226381	YEL036C	ANP1	2.93426128	0.0000173	68.5	P	C
YFR042W	0.18765	1.63215	0.11497	0.11497	6	0	0.644664705	YFR042W	-0.619827236	9.38017276	YFR042W	KEG1	3.49169881	0	8	P	C
YGL013C	0.19553	2.08346	0.09385	0.09385	28	5					YGL013C	TPE3	2.4076807	0.0000026	371.318182	I	C
YGL195W	0.14232	1.78689	0.07964	0.07964	97	5	0.654213631	YGL195W	0.395262015	10.395262	YGL195W	YGL195W	2.21331545	0.000377	202.651007	I	C
YHR072W-A	0.04824	1.10691	0.04358	0.04358	15	4	0.652970455	YHR072W-A	1.9236964	11.9236964	YHR072W-A	YHR072W-A	3.03622338	0.0000289	77	P	C
YHR084W	0.1738	2.05165	0.08471	0.08471	42	1	0.64745727	YHR084W	-0.460313211	9.53968679	YHR084W	STE12	2.37514674	0.000807	382.225807	I	C
YJL171C	0.12886	1.77809	0.07247	0.07247	1	3	0.65148346	YJL171C	0.888305365	10.8883054	YJL171C	YJL171C	2.5311085	0.0000168	1410	I	C
YKR101W	0.58253	2.05362	0.28366	0.28366	14	1					YKR101W	SIR1	2.33439544	0.00000032	1542.66667	I	C
YLR131C	0.2949	1.91405	0.15407	0.15407	37	3					YLR131C	ACE2	2.30856951	0.0000426	1081	I	C
YLR362W	0.1426	2.01202	0.07087	0.07087	82	20	0.661578512	YLR362W	-0.248594595	9.75140541	YLR362W	YLR362W	2.27318464	0.000102	875.125	I	C
YMR015C	0.04801	1.25613	0.03822	0.03822	19	1	0.64745727	YMR015C	2.12091374	12.1209137	YMR015C	YMR015C	2.3672648	0.0000516	669.307692	I	C
YMR307W	0.15448	1.69983	0.09088	0.09088	41	2					YMR307W	GGP1	2.49253731	0.00000421	727.25	I	C
YOR061W	0.02245	1.30569	0.01719	0.01719	337	85					YOR061W	CKA2	2.25373134	0.000414	283.458333	I	C
YOR140W	0.22245	1.75426	0.12681	0.12681	19	6	0.655265495	YOR140W	-0.419709641	9.58029036	YOR140W	YOR140W	2.32802281	0.00000036	1726.625	I	C
YOR212W	0.1034	1.70956	0.06049	0.06049	50	7	0.656164859	YOR212W	-0.486415506	9.51358449	YOR212W	YOR212W	2.43367433	0.0000153	610	I	C
YOR336W	0.34801	2.07679	0.16757	0.16757	2	0	0.644664705	YOR336W	-0.178988475	9.82101153	YOR336W	KRE5	2.40197887	0.00000169	1601.66667	I	C
YOR371C	0.22811	2.05127	0.11121	0.11121	10	1	0.64745727	YOR371C	-0.390707091	9.60929291	YOR371C	KRH2	2.32030857	0.00000168	1456.2	I	C
YPR159W	0.11591	1.78571	0.06491	0.06491	32	2	0.649680051	YPR159W	0.488070175	10.4880702	YPR159W	CWH48	2.64112024	0.0000193	588.666667	P	C
											YDR009W	GAL3	2.37715915	0.0000343	1613.71429	I	C
											YJL105W	SET4	2.51601543	0	3491	I	C
											YGL066W	SGF73	2.25758846	0.000358	231.27551	I	C
											YOR043W	WHI2	2.30940802	0.000109	833.352941	I	C
YAL038W	0.02332	0.25658	0.0909	0.0909	136	10	-0.391867286	YAL038W	6.84252888	16.8425289	YAL038W	CDC19	2.17692437	0.00107672	121.514852	H	H
YBL024W	0.06256	1.56218	0.04005	0.04005	44	5	15	YBL024W	1.27113903	11.271139	YBL024W	TRM4	2.39678014	0.00101737	323.677419	H	H
YBL030C	0.05369	0.85291	0.06295	0.06295	84	5	15	YBL030C	3.99737873	13.9973787	YBL030C	AAC2	2.30102298	0.00235404	137.170455	H	H
YBL075C	0.04972	2.0547	0.0242	0.0242	1777	767	4.55988069	YBL075C	0.285052325	10.2850523	YBL075C	SSA3	2.15914808	0.00397476	76.0646067	H	H
YBL104C	0.1061	2.04043	0.052	0.052	28	6	16	YBL104C	-0.260195615	9.73980439	YBL104C	YBL104C	2.32768741	0.000861	244.982143	H	H
YBR034C	0.04298	1.65056	0.02604	0.02604	21	1	11	YBR034C	1.32624387	11.3262439	YBR034C	ODP1	2.39426463	0.01600742	34.6501901	H	H
YBR127C	0.01465	0.84987	0.01724	0.01724	78	3	13	YBR127C	2.10351221	12.1035122	YBR127C	VMA2	2.11822908	0.00517414	63.3657143	H	H
YBR169C	0.11965	2.11366	0.05661	0.05661	190	39	-0.202170204	YBR169C	0.418464055	10.4184641	YBR169C	SSE2	2.18816032	0.00185292	97.8198529	H	H
YBR198C	0.07764	1.81959	0.04267	0.04267	210	53	-0.110592302	YBR198C	-0.471914231	9.52808577	YBR198C	YBR198C	2.21432165	0.00116823	144.029703	H	H
YBR217W	0.18839	2.29068	0.08224	0.08224	64	3	13	YBR217W	-0.805443556	9.19455644	YBR217W	APG12	2.34932081	0.0021663	164	H	H
YCR057C	0.07999	1.57678	0.05073	0.05073	131	11	-0.385326007	YCR057C	0.05013167	10.0501317	YCR057C	YCR057C	2.24853262	0.000926	175.774436	H	H
YDL003W	0.31921	2.25922	0.14129	0.14129	28	8	18	YDL003W	-0.09488108	9.90511892	YDL003W	PDS3	2.3258427	0.00105063	394	H	H
YDL100C	0.03971	1.53734	0.02583	0.02583	63	1	11	YDL100C	1.64817218	11.6481722	YDL100C	YDL100C	2.35820896	0.00179115	238.622222	H	H
YDL143W	0.03158	1.41596	0.0223	0.0223	75	11	21	YDL143W	0.963711995	10.963712	YDL143W	YDL143W	2.20073788	0.00173524	115.79803	H	H
YDL208W	0.0154	1.35276	0.01139	0.01139	67	13	23	YDL208W	1.98750201	11.987502	YDL208W	YDL208W	2.43786685	0.00230702	129.253333	H	H
YDR101C	0.08268	1.61197	0.05129	0.05129	74	0	10	YDR101C	1.11452526	11.1145253	YDR101C	ARX1	2.24601711	0.00151135	145.049383	H	H
YDR228C	0.1599	1.75566	0.09107	0.09107	25	5	15	YDR228C	0.06173269	10.0617327	YDR228C	PCF11	2.34294818	0.00191099	128.2125	H	H
YDR233C	0.10959	1.14263	0.09591	0.09591	46	8	18	YDR233C	2.57625378	12.5762538	YDR233C	RTN1	2.26329029	0.00191551	154.404255	H	H
YDR288W	0.27318	1.60451	0.17026	0.17026	22	13	23	YDR288W	-0.590824686	9.40917531	YDR288W	YDR288W	2.30169378	0.000918	275.4	H	H
YDR328C	0.03936	1.62194	0.02427	0.02427	147	31	-0.254500433	YDR328C	0.209645695	10.2096457	YDR328C	CBF3D	2.48079826	0.00117551	102.04918	H	H
YDR448W	0.05273	1.99462	0.02644	0.02644	121	7	-0.411491122	YDR448W	-0.782241516	9.21775848	YDR448W	YDR448W	2.27016602	0.00130472	109.464115	H	H
YER020W	0.16563	1.75332	0.09447	0.09447	70	6	16	YER020W	-0.785141771	9.21485823	YER020W	SSP101	2.34814691	0.000755	195.05	H	H
YER110C	0.03807	1.69562	0.02245	0.02245	149	12	-0.378784728	YER110C	2.06870915	12.0687092	YER110C	YRB4	2.27955727	0.000589	124.01875	H	H
YER125W	0.02779	1.55928	0.01782	0.01782	271	14	-0.365702171	YER125W	0.30535411	10.3053541	YER125W	RSP5	2.45933255	0.00265232	48.4829932	H	H
YER165W	0.02171	0.77119	0.02815	0.02815	237	52	-0.117133581	YER165W	3.46663206	13.4666321	YER165W	PAB1	2.26697971	0.000901	93.0292398	H	H
YFL010C	0.18118	1.53864	0.11775	0.11775	88	23	33	YFL010C	-0.306599696	9.69340031	YFL010C	YFL010C	2.37464364	0.000809	124.285714	H	H
YFL037W	0.00514	1.28716	0.00399	0.00399	130	10	-0.391867286	YFL037W	1.39294974	11.3929497	YFL037W	YFL037W	2.27570015	0.00124105	78.5928571	H	H
YGL120C	0.03026	1.60385	0.01887	0.01887	220	34	-0.234876597	YGL120C	0.720090575	10.7200906	YGL120C	PRP43	2.20526581	0.00275272	167.464865	H	H
YGR038W	0.0949	1.69452	0.056	0.056	62	5	15	YGR038W	0.157441105	10.1574411	YGR038W	ORM1	2.33137682	0.000769	217.5	H	H
YGR078C	0.101	2.26282	0.04464	0.04464	19	7	17	YGR078C	-0.364604796	9.63539521	YGR078C	PFD3	2.26261949	0.00126898	101.953947	H	H
YGR252W	0.08122	1.6195	0.05015	0.05015	335	75	0.033315829	YGR252W	-0.576323411	9.42367659	YGR252W	YGR252W	2.14556431	0.00643251	87.0532995	H	H
YHR061C	0.25106	1.70463	0.14728	0.14728	36	7	17	YHR061C	-0.173187965	9.82681204	YHR061C	GIC1	2.32315948	0.00122121	455.818182	H	H
YHR064C	0.07863	1.37974	0.05699	0.05699	128	15	-0.359160892	YHR064C	2.9938905	12.9938905	YHR064C	SSZ1	2.04980714	0.01804508	50.0825175	H	H
YHR083W	0.38769	1.72287	0.22503	0.22503	21	0	10	YHR083W	-0.367505051	9.63249495	YHR083W	SAM35	2.51769244	0.00276569	51.3505155	H	H
YHR122W	0.1254	1.69387	0.07403	0.07403	4	5	15	YHR122W	-0.451612446	9.54838755	YHR122W	YHR122W	2.2440047	0.00709225	137.916667	H	H
YHR197W	0.24453	2.04369	0.11965	0.11965	92	10	20	YHR197W	0.36335921	10.3633592	YHR197W	IPI2	2.28123428	0.000859	202.542857	H	H
YIR004W	0.13332	1.75581	0.07593	0.07593	29	14	24	YIR004W	-0.21089128	9.78910872	YIR004W	YIR004W	2.27989267	0.00150652	100.102703	H	H
YIR033W	0.15858	1.95411	0.08115	0.08115	35	2	12	YIR033W	-0.12968414	9.87031586	YIR033W	YIR033W	2.34479289	0.00160258	475.166667	H	H
YJL130C	0.04117	1.53082	0.02689	0.02689	95	6	16	YJL130C	1.4277528	11.4277528	YJL130C	YJL130C	2.13650847	0.00317225	90.425	H	H
YJL147C	0.42817	1.86374	0.22974	0.22974	4	3	13	YJL147C	-0.483515251	9.51648475	YJL147C	MRX5	2.42126446	0.00102085	177.1875	H	H
YJL168C	0.14531	2.16936	0.06698	0.06698	90	10	20	YJL168C	-0.324001226	9.67599878	YJL168C	KMT3	2.28743921	0.00111525	263.246753	H	H
YJL179W	0.07993	1.58808	0.05033	0.05033	27	4	14	YJL179W	-0.15288618	9.84711382	YJL179W	PFD1	2.1641791	0.0037663	60.5362694	H	H
YJR072C	0.05133	1.649	0.03113	0.03113	57	0	10	YJR072C	0.145840085	10.1458401	YJR072C	NPA3	2.35804125	0.00316759	179.333333	H	H
YKL059C	0.11071	2.02197	0.05475	0.05475	23	3	13	YKL059C	-0.402308111	9.59769189	YKL059C	YKL059C	2.38034546	0.00174943	146.015873	H	H
YKL195W	0.40741	2.2479	0.18124	0.18124	59	25	35	YKL195W	0.215446205	10.2154462	YKL195W	TIM40	2.29833976	0.00184109	246.926471	H	H
YKR001C	0.03578	1.67901	0.02131	0.02131	78	8	18	YKR001C	0.876704345	10.8767044	YKR001C	VPS1	2.29766896	0.000732	130.944444	H	H
YLR197W	0.04571	0.91488	0.04997	0.04997	210	15	-0.359160892	YLR197W	2.61395709	12.6139571	YLR197W	NOP56	2.2047627	0.00159562	255.967742	H	H
YLR200W	0.17779	1.63068	0.10903	0.10903	70	42	52	YLR200W	-0.196390005	9.80361	YLR200W	YLR200W	2.23109173	0.00179615	111.854651	H	H
YLR249W	0.04316	0.5878	0.07342	0.07342	156	18	-0.339537056	YLR249W	5.62152153	15.6215215	YLR249W	YLR249W	2.27033372	0.00071	171.394231	H	H
YLR259C	0.02131	1.48328	0.01436	0.01436	83	4	14	YLR259C	2.70096474	12.7009647	YLR259C	HSP60	2.40365588	0.00128108	63.8715084	H	H
YLR340W	0.06977	0.59464	0.11733	0.11733	147	10	-0.391867286	YLR340W	5.89994601	15.899946	YLR340W	RPL10E	2.32953211	0.000838	77.4440433	H	H
YLR350W	0.07708	1.92966	0.03995	0.03995	71	5	15	YLR350W	-0.353003776	9.64699623	YLR350W	ORM2	2.36910951	0.000896	106.186441	H	H
YLR423C	0.24652	1.99433	0.12361	0.12361	144	25	-0.293748105	YLR423C	-0.21089128	9.78910872	YLR423C	ATG17	2.28291129	0.00123693	216.056338	H	H
YML018C	0.14894	1.42277	0.10468	0.10468	9	0	10	YML018C	-0.477714741	9.52228526	YML018C	YML018C	2.3266812	0.000833	199.434211	H	H
YML109W	0.3579	1.95024	0.18351	0.18351	55	9	19	YML109W	-0.344303011	9.65569699	YML109W	ZDS2	2.34177427	0.00192416	265.877551	H	H
YMR186W	0.02754	0.9697	0.0284	0.0284	1012	371	1.96953432	YMR186W	4.66733763	14.6673376	YMR186W	YMR186W	2.09139695	0.00777857	68.1783681	H	H
YMR236W	0.11311	2.1171	0.05343	0.05343	98	4	14	YMR236W	-1.14767365	8.85232635	YMR236W	TAF17	2.23511655	0.000798	155.051282	H	H
YNL007C	0.03403	1.74041	0.01955	0.01955	68	14	24	YNL007C	-0.022374705	9.9776253	YNL007C	SIS1	2.09575717	0.00616951	59.4962963	H	H
YNL077W	0.19585	2.38948	0.08196	0.08196	29	15	25	YNL077W	-0.483515251	9.51648475	YNL077W	YNL077W	2.28291129	0.000668	78.3892216	H	H
YNL153C	0.13141	1.4142	0.09292	0.09292	44	18	28	YNL153C	-0.556021626	9.44397837	YNL153C	YNL153C	2.38403488	0.00430791	47.7829787	H	H
YNL221C	0.2785	2.10613	0.13223	0.13223	12	0	10	YNL221C	-0.503817036	9.49618296	YNL221C	YNL221C	2.26983062	0.00865479	624.3	H	H
YOL115W	0.14747	2.16211	0.0682	0.0682	30	10	20	YOL115W	-0.25149485	9.74850515	YOL115W	PAP2	2.22790542	0.01126165	528.961539	H	H
YOL133W	0.10757	1.81748	0.05918	0.05918	67	6	16	YOL133W	0.476469155	10.4764692	YOL133W	YOL133W	2.62552407	0.00328601	45.1792453	H	H
YPL049C	0.33856	1.8707	0.18098	0.18098	52	3	13	YPL049C	-1.10416982	8.89583018	YPL049C	YPL049C	2.28844541	0.00224204	266.835821	H	H
YPL212C	0.10852	1.96047	0.05535	0.05535	7	0	10	YPL212C	0.209645695	10.2096457	YPL212C	YPL212C	2.33338923	0.00130316	328.263158	H	H
YAL002W	0.2162	1.74113	0.12417	0.12417	15	1	11	YAL002W	-0.335602246	9.66439776	YAL002W	FUN15	2.28760691	0.0000176	847.35	I	I
YAL007C	0.14559	1.44926	0.10046	0.10046	99	8	18	YAL007C	0.97241276	10.9724128	YAL007C	YAL007C	2.32768741	0.000029	553.961539	I	I
YAL009W	0.07554	1.39199	0.05427	0.05427	7	2	12	YAL009W	-0.492216016	9.50778398	YAL009W	SPO7	2.4078484	0.000172	605.4375	I	I
YAL011W	0.25078	2.02169	0.12404	0.12404	58	29	39	YAL011W	-0.2804974	9.7195026	YAL011W					I	I
YAL012W	0.03722	1.20233	0.03095	0.03095	9	0	10	YAL012W	2.6197576	12.6197576	YAL012W	CYI1	2.35150092	0.0000208	1040.66667	I	I
YAL015C	0.18699	1.55502	0.12025	0.12025	22	1	11	YAL015C	-0.361704541	9.63829546	YAL015C	NTG1	2.41371793	0	1826.6	I	I
YAL016W	0.04797	1.28273	0.0374	0.0374	59	6	16	YAL016W	0.302453855	10.3024539	YAL016W	TPD3	2.29213483	0.000339	298.304348	I	I
YAL019W	0.11398	1.75751	0.06486	0.06486	55	17	27	YAL019W	-0.033975725	9.96602428	YAL019W	YAL019W	2.29783666	0.00000214	1057.875	I	I
YAL021C	0.08824	1.55885	0.05661	0.05661	58	6	0.655265495	YAL021C	-0.355904031	9.64409597	YAL021C	CCR4	2.30890491	0.0000598	407.432432	I	I
YAL023C	0.09196	1.36494	0.06737	0.06737	30	5	15	YAL023C	0.946310465	10.9463105	YAL023C	FUN25	2.43635754	0.00000371	1285.4	I	I
YAL031C	0.23051	1.77718	0.12971	0.12971	9	0	10	YAL031C	-0.416809386	9.58319061	YAL031C	YAL031C	2.37699145	0.00000278	1383.85714	I	I
YAL034C	0.18601	1.71405	0.10852	0.10852	17	0	10	YAL034C	-0.512517801	9.4874822	YAL034C	FUN19	2.28106658	0.000151	286.355932	I	I
YAL034W-A	0.22126	1.98587	0.11142	0.11142	56	22	32	YAL034W-A	-0.892451206	9.10754879	YAL034W-A	DSN3	2.34009727	0.0000229	667.555556	I	I
YAL035W	0.10546	1.31645	0.08011	0.08011	82	8	18	YAL035W	2.14991629	12.1499163	YAL035W	YAL035W	2.27368774	0.0000955	351.968254	I	I
YAL036C	0.03293	1.48774	0.02213	0.02213	41	3	13	YAL036C	0.9956148	10.9956148	YAL036C	RBG1	2.28844541	0.00000865	710.095238	I	I
YAL039C	0.17443	1.9362	0.09009	0.09009	8	0	10	YAL039C	-0.761939731	9.23806027	YAL039C	CYC3	2.43032031	0.00000373	660.461539	I	I
YAL040C	0.1466	1.32236	0.11087	0.11087	10	5	15	YAL040C	0.366259465	10.3662595	YAL040C	YAL040C	2.40332048	0.00000027	1308.14286	I	I
YAL041W	0.10971	1.75217	0.06261	0.06261	55	12	22	YAL041W	-0.457412956	9.54258704	YAL041W	CDC24	2.2860976	0.0000219	674.285714	I	I
YAL043C	0.17504	2.11589	0.08272	0.08272	50	14	24	YAL043C	-0.419709641	9.58029036	YAL043C	PTA1	2.35233943	0.0000388	365.485714	I	I
YAL044C	0.07896	1.84101	0.04289	0.04289	2	0	10	YAL044C	-0.115182865	9.88481714	YAL044C	GCV3	2.63374141	0.00000119	1405.5	I	I
YAL044W-A	0.10911	1.87277	0.05826	0.05826	2	2	12	YAL044W-A	-0.547320861	9.45267914	YAL044W-A	YAL044W-A	2.36592319	0.0000861	1220.66667	I	I
YAL048C	0.07301	1.7423	0.0419	0.0419	7	0	10	YAL048C	-0.271796635	9.72820337	YAL048C	GEM1	2.37665605	0.0000815	495.9	I	I
YAL049C	0.21387	1.98025	0.108	0.108	1	0	10	YAL049C	0.08493473	10.0849347	YAL049C	AIM2	2.47056851	0.00000172	1237	I	I
YAL051W	0.13844	1.81694	0.07619	0.07619	12	1	11	YAL051W	-0.338502501	9.6614975	YAL051W	YAL051W	2.39141372	0.00000198	1194.57143	I	I
YAL055W	0.54918	2.51426	0.21842	0.21842	4	0	10	YAL055W	-0.805443556	9.19455644	YAL055W	YAL055W	2.63457991	0.00000015	932.666667	I	I
YAL059W	0.25987	1.78539	0.14555	0.14555	27	3	13	YAL059W	0.290852835	10.2908528	YAL059W	ECM1	2.35988596	0.0000321	552.666667	I	I
YAL060W	0.13141	1.72498	0.07618	0.07618	8	1	11	YAL060W	0.73459185	10.7345919	YAL060W	BDH1	2.41438873	0.00000878	1481	I	I
YAL061W	0.1055	2.05462	0.05135	0.05135	8	0	10	YAL061W	-0.405208366	9.59479163	YAL061W	BDH2	2.31745766	0.00000061	1293.72727	I	I
YAR002C-A	0.13839	1.80913	0.0765	0.0765	67	7	17	YAR002C-A	1.26243826	11.2624383	YAR002C-A	YAR002C-A	2.3271843	0.0000611	323.148936	I	I
YAR002W	0.43646	2.11786	0.20609	0.20609	38	7	17	YAR002W	-0.2804974	9.7195026	YAR002W	YAR002W	2.36122757	0.0000107	674.705882	I	I
YAR007C	0.04693	1.72976	0.02713	0.02713	99	4	14	YAR007C	0.63598318	10.6359832	YAR007C	BUF2	2.24920342	0.00017	387.351852	I	I
YAR015W	0.07415	1.43512	0.05167	0.05167	12	0	10	YAR015W	1.04781939	11.0478194	YAR015W	ADE1	2.30236458	0.000028	1321.72727	I	I
YAR018C	0.04868	1.63868	0.02971	0.02971	185	61	-0.058262072	YAR018C	-0.289198165	9.71080184	YAR018C	KIN3	2.34496059	0.0000424	878.363636	I	I
YBL023C	0.04209	1.82436	0.02307	0.02307	82	7	17	YBL023C	0.285052325	10.2850523	YBL023C	YBL023C	2.27335234	0.0000989	372.843137	I	I
YBL033C	0.14476	2.02954	0.07133	0.07133	3	0	10	YBL033C	-0.851847636	9.14815236	YBL033C	RIB1	2.31326513	0.0000314	1401.6	I	I
YBL045C	0.12555	1.61309	0.07783	0.07783	91	0	10	YBL045C	1.44225407	11.4422541	YBL045C	COR1	2.37799765	0.000075	675.071429	I	I
YBL046W	0.30721	2.21946	0.13842	0.13842	31	21	31	YBL046W	-0.451612446	9.54838755	YBL046W	YBL046W	2.36458159	0.00000412	797.125	I	I
YBL051C	0.15589	1.86411	0.08363	0.08363	38	9	19	YBL051C	0.331456405	10.3314564	YBL051C	MDT1	2.36173067	0.0000159	396.833333	I	I
YBL052C	0.41569	2.29022	0.18151	0.18151	20	14	24	YBL052C	-0.529919331	9.47008067	YBL052C	SAS3	2.32081167	0.0000472	497.9	I	I
YBL056W	0.08705	1.96091	0.04439	0.04439	40	9	19	YBL056W	0.36915972	10.3691597	YBL056W	PTC3	2.35653195	0.00000603	569.619048	I	I
YBL057C	0.20564	1.82249	0.11283	0.11283	29	5	15	YBL057C	-0.437111171	9.56288883	YBL057C	YBL057C	2.36340768	0.0000016	1873.66667	I	I
YBL058W	0.21145	2.00026	0.10571	0.10571	40	4	14	YBL058W	-0.306599696	9.69340031	YBL058W	SHP1	2.27737716	0.0000395	571.5	I	I
YBL064C	0.06411	2.33534	0.02745	0.02745	21	3	13	YBL064C	0.57797808	10.5779781	YBL064C	YBL064C	2.45916485	0.00000028	1497	I	I
YBL066C	0.18149	2.05856	0.08817	0.08817	7	3	13	YBL066C	-0.335602246	9.66439776	YBL066C	YBL066C	2.41858125	0.0000129	971.5	I	I
YBL067C	0.26898	2.08735	0.12886	0.12886	81	7	17	YBL067C	-0.379106071	9.62089393	YBL067C	YBL067C	2.37380513	0.00000136	1217.2	I	I
YBL076C	0.06639	1.43644	0.04622	0.04622	31	3	13	YBL076C	2.19922063	12.1992206	YBL076C	ILS1	2.27720946	0.0000362	694.285714	I	I
YBL078C	0.01162	1.51043	0.00769	0.00769	28	3	13	YBL078C	-0.355904031	9.64409597	YBL078C	YBL078C	2.45195371	0.0000826	637.1	I	I
YBL086C	0.19218	2.19085	0.08772	0.08772	9	1	11	YBL086C	-0.587924431	9.41207557	YBL086C	YBL086C	2.35032702	0.00000089	1822	I	I
YBL089W	0.22279	1.89933	0.1173	0.1173	13	1	11	YBL089W	-0.663331061	9.33666894	YBL089W	AVT5	2.46738219	0	2760.5	I	I
YBL090W	0.16617	1.57401	0.10557	0.10557	27	1	11	YBL090W	-0.408108621	9.59189138	YBL090W	YBL090W	2.37497904	0.00000905	728.083333	I	I
YBL091C	0.10108	1.52918	0.0661	0.0661	5	1	11	YBL091C	0.714290065	10.7142901	YBL091C	MAP2	2.4090223	0.00000398	1401.66667	I	I
YBL098W	0.13589	1.67166	0.08129	0.08129	0	0	10	YBL098W	0.018228865	10.0182289	YBL098W	BNA4	2.4293141	0	2653.33333	I	I
YBL101C	0.21322	2.03413	0.10482	0.10482	16	0	10	YBL101C	-0.596625196	9.4033748	YBL101C	YBL101C	2.387892	0.00000218	1370.85714	I	I
YBL103C	0.16851	1.59759	0.10548	0.10548	52	19	29	YBL103C	-0.402308111	9.59769189	YBL103C	YBL103C	2.31661915	0.0000232	1155.4	I	I
YBR003W	0.08175	1.75895	0.04648	0.04648	1	0	10	YBR003W	-0.402308111	9.59769189	YBR003W	COQ1	2.33422774	0.0000181	1809.66667	I	I
YBR004C	0.18605	1.71524	0.10847	0.10847	2	0	10	YBR004C	-0.11808312	9.88191688	YBR004C	GPI18	2.90508133	0	1321	I	I
YBR015C	0.26948	1.82478	0.14768	0.14768	11	4	14	YBR015C	0.557676295	10.5576763	YBR015C	MNN2	2.43987926	0.00000007	1983	I	I
YBR017C	0.08402	1.59912	0.05254	0.05254	86	8	18	YBR017C	-0.07747955	9.92252045	YBR017C	YBR017C	2.31091732	0.0000223	466.268293	I	I
YBR021W	0.08541	1.55116	0.05506	0.05506	16	4	14	YBR021W	0.28795258	10.2879526	YBR021W	FUR4	2.37531444	0.0000114	338.612903	I	I
YBR028C	0.15842	2.07794	0.07624	0.07624	66	19	29	YBR028C	-0.24569434	9.75430566	YBR028C	YBR028C	2.36625859	0.000061	1911.16667	I	I
YBR035C	0.07033	1.54889	0.04541	0.04541	15	2	12	YBR035C	0.679487005	10.679487	YBR035C	PDX3	2.40164347	0	2358.33333	I	I
YBR037C	0.13219	1.91592	0.06899	0.06899	10	0	10	YBR037C	-0.825745341	9.17425466	YBR037C	SCO1	2.59047459	0.00000553	1267.66667	I	I
YBR042C	0.17945	1.82588	0.09828	0.09828	19	0	10	YBR042C	-0.202190515	9.79780949	YBR042C	YBR042C	2.4085192	0.0000142	2073.5	I	I
YBR047W	0.24237	1.82613	0.13272	0.13272	7	4	14	YBR047W	-0.248594595	9.75140541	YBR047W	FMP23	2.40482978	0	2371	I	I
YBR052C	0.20269	1.71875	0.11793	0.11793	81	10	20	YBR052C	-0.08328006	9.91671994	YBR052C	RFS1	2.39141372	0.0000768	377.583333	I	I
YBR058C	0.20449	2.06852	0.09886	0.09886	23	0	10	YBR058C	-0.14128516	9.85871484	YBR058C	GID6	2.41069931	0.0000009	738.25	I	I
YBR060C	0.23767	1.9624	0.12111	0.12111	46	10	20	YBR060C	-0.413909131	9.58609087	YBR060C	YBR060C	2.37246353	0.0000131	682.5	I	I
YBR061C	0.09342	1.70286	0.05486	0.05486	6	2	12	YBR061C	-0.19348975	9.80651025	YBR061C	YBR061C	2.44709039	0.0000478	1413.25	I	I
YBR065C	0.35312	2.29896	0.1536	0.1536	26	1	11	YBR065C	-0.660430806	9.33956919	YBR065C	ECM2	2.28794231	0.0000228	639.928571	I	I
YBR069C	0.17685	1.81927	0.09721	0.09721	126	6	-0.418032401	YBR069C	-0.022374705	9.9776253	YBR069C	VAP1	2.37715915	0.00000716	618.0625	I	I
YBR071W	0.35082	2.0152	0.17409	0.17409	8	10	20	YBR071W	-0.08328006	9.91671994	YBR071W	YBR071W	2.43803455	0	2228	I	I
YBR072W	0.10341	1.48371	0.0697	0.0697	52	0	10	YBR072W	1.93529742	11.9352974	YBR072W	YBR072W	2.29783666	0.000393	167.262712	I	I
YBR086C	0.32925	1.77164	0.18584	0.18584	36	7	17	YBR086C	0.16034136	10.1603414	YBR086C	YBR086C	2.34915311	0.0000203	765.571429	I	I
YBR087W	0.09477	1.85614	0.05105	0.05105	32	3	13	YBR087W	-0.18188873	9.81811127	YBR087W	RFC5	2.36273688	0.0000111	632.1875	I	I
YBR095C	0.24195	2.21804	0.10908	0.10908	37	7	17	YBR095C	-0.09488108	9.90511892	YBR095C	RXT2	2.35602884	0.0000439	772.8	I	I
YBR107C	0.22259	1.57892	0.14098	0.14098	24	0	10	YBR107C	-0.541520351	9.45847965	YBR107C	YBR107C	2.37464364	0.0000792	300.151515	I	I
YBR110W	0.16361	1.81877	0.08996	0.08996	48	1	11	YBR110W	-0.219592045	9.78040796	YBR110W	YBR110W	2.44541338	0	2318	I	I
YBR114W	0.0977	1.90345	0.05133	0.05133	41	5	15	YBR114W	0.267650795	10.2676508	YBR114W	RAD16	2.31091732	0.0000345	447.638889	I	I
YBR123C	0.16585	2.17243	0.07634	0.07634	15	1	11	YBR123C	-0.19929026	9.80070974	YBR123C	TFC1	2.33087372	0.0000858	493.846154	I	I
YBR125C	0.06689	1.57311	0.04252	0.04252	20	5	15	YBR125C	-0.324001226	9.67599878	YBR125C	PTC4	2.33204763	0.00000162	1132.3	I	I
YBR126C	0.028	1.68042	0.01666	0.01666	61	6	16	YBR126C	0.285052325	10.2850523	YBR126C	BYP1	2.31477444	0.0000842	483.612903	I	I
YBR128C	0.24453	1.55978	0.15677	0.15677	16	6	16	YBR128C	-0.718435906	9.28156409	YBR128C	YBR128C	2.46520208	0.0000926	684.111111	I	I
YBR129C	0.17109	1.98171	0.08633	0.08633	12	11	21	YBR129C	-0.457412956	9.54258704	YBR129C	YBR129C	2.49337582	0	1818.5	I	I
YBR130C	0.26272	1.73923	0.15105	0.15105	65	21	31	YBR130C	-0.062978275	9.93702173	YBR130C	SHE3	2.29465034	0.0000256	783	I	I
YBR135W	0.02031	1.63714	0.01241	0.01241	58	4	14	YBR135W	-0.776441006	9.22355899	YBR135W	YBR135W	2.27938957	0.00025	811.833333	I	I
YBR143C	0.0218	1.69914	0.01283	0.01283	50	4	14	YBR143C	1.78738442	11.7873844	YBR143C	SAL4	2.284756	0.000431	332.526316	I	I
YBR151W	0.19079	2.2306	0.08553	0.08553	3	0	10	YBR151W	-0.277597145	9.72240286	YBR151W	APD1	2.37246353	0.00000259	843.615385	I	I
YBR155W	0.1512	2.0277	0.07457	0.07457	32	3	13	YBR155W	0.157441105	10.1574411	YBR155W	CNS1	2.31108502	0.00000324	1251.16667	I	I
YBR158W	0.221	1.91295	0.11553	0.11553	5	0	10	YBR158W	-0.321100971	9.67889903	YBR158W	CST13	2.32047627	0.0000827	241.4	I	I
YBR161W	0.19362	1.97495	0.09804	0.09804	12	0	10	YBR161W	-0.202190515	9.79780949	YBR161W	YBR161W	2.45530773	0.000181	1148.75	I	I
YBR163W	0.33322	2.30112	0.14481	0.14481	8	0	10	YBR163W	-0.25729536	9.74270464	YBR163W	YBR163W	2.50075465	0	928.5	I	I
YBR172C	0.38194	2.02423	0.18869	0.18869	21	1	11	YBR172C	-0.14128516	9.85871484	YBR172C	SMY2	2.3067248	0.000279	740.619048	I	I
YBR183W	0.13874	1.7367	0.07989	0.07989	41	0	10	YBR183W	-0.466113721	9.53388628	YBR183W	YBR183W	2.47878585	0	1225.33333	I	I
YBR185C	0.16931	2.01059	0.08421	0.08421	8	2	12	YBR185C	-0.477714741	9.52228526	YBR185C	MBA1	2.48281067	0.0000142	852	I	I
YBR193C	0.15533	1.79477	0.08655	0.08655	32	3	13	YBR193C	-0.309499951	9.69050005	YBR193C	YBR193C	2.35200402	0.0000122	622.736842	I	I
YBR194W	0.64194	2.50058	0.25672	0.25672	175	37	-0.215252761	YBR194W	-0.382006326	9.61799367	YBR194W	YBR194W	2.35267483	0.000306	160.185714	I	I
YBR202W	0.06685	1.70846	0.03913	0.03913	45	2	12	YBR202W	0.36335921	10.3633592	YBR202W	MCM7	2.40600369	0.0000076	737.5	I	I
YBR207W	0.13759	1.73377	0.07936	0.07936	55	12	22	YBR207W	0.024029375	10.0240294	YBR207W	YBR207W	2.31578065	0.000563	202.083333	I	I
YBR211C	0.22828	1.98509	0.115	0.115	55	12	22	YBR211C	-0.587924431	9.41207557	YBR211C	ARP100	2.33774945	0.0000751	675.210526	I	I
YBR214W	0.08343	1.57461	0.05299	0.05299	33	1	11	YBR214W	-0.207991025	9.79200898	YBR214W	SDS24	2.34043267	0.00000444	924.642857	I	I
YBR216C	0.3204	1.92061	0.16682	0.16682	9	7	17	YBR216C	-0.260195615	9.73980439	YBR216C	YBR216C	2.34831461	0.0000102	573.666667	I	I
YBR233W	0.16928	1.95871	0.08642	0.08642	26	5	15	YBR233W	-0.576323411	9.42367659	YBR233W	PBP2	2.38269328	0.000415	559.611111	I	I
YBR234C	0.10302	1.58935	0.06482	0.06482	40	5	15	YBR234C	0.29375309	10.2937531	YBR234C	ARC40	2.32399799	0.000234	275.421053	I	I
YBR236C	0.13571	2.15297	0.06304	0.06304	3	1	11	YBR236C	-0.26889638	9.73110362	YBR236C	ABD1	2.41824585	0.0000152	710.4	I	I
YBR237W	0.22941	2.32501	0.09867	0.09867	30	6	16	YBR237W	-0.448712191	9.55128781	YBR237W	PRP5	2.34797921	0.00000441	1715.5	I	I
YBR246W	0.26626	2.13819	0.12452	0.12452	4	0	10	YBR246W	-0.498016526	9.50198347	YBR246W	RRT2	2.4283079	0.00000037	997.333333	I	I
YBR247C	0.10698	1.8403	0.05813	0.05813	105	14	-0.365702171	YBR247C	0.227047225	10.2270472	YBR247C	YBR247C	2.27972497	0.000588	197.869159	I	I
YBR248C	0.10842	1.9182	0.05652	0.05652	2	0	10	YBR248C	0.13713932	10.1371393	YBR248C	YBR248C	2.6127788	0.00000001	1104.5	I	I
YBR249C	0.05052	1.07124	0.04716	0.04716	14	0	10	YBR249C	3.65224838	13.6522484	YBR249C	YBR249C	2.35804125	0.00000185	1185.3	I	I
YBR253W	0.15863	1.5645	0.10139	0.10139	53	33	43	YBR253W	-0.741637946	9.25836205	YBR253W	MED22	2.3062217	0.000124	319.948276	I	I
YBR254C	0.1087	1.9354	0.05616	0.05616	22	9	19	YBR254C	-0.857648146	9.14235185	YBR254C	TRS20	2.41422103	0.0000861	373.714286	I	I
YBR263W	0.06459	1.25499	0.05146	0.05146	31	0	10	YBR263W	1.34944591	11.3494459	YBR263W	YBR263W	2.34361898	0.00000163	921.846154	I	I
YBR264C	0.24245	1.41188	0.17172	0.17172	36	27	37	YBR264C	-1.24048181	8.75951819	YBR264C	YPT10	2.4073453	0.000027	1108.6	I	I
YBR279W	0.18537	1.85587	0.09989	0.09989	72	14	24	YBR279W	0.32855615	10.3285562	YBR279W	PAF1	2.35183632	0.000257	650.210526	I	I
YBR281C	0.10497	1.81891	0.05771	0.05771	12	0	10	YBR281C	-0.057177765	9.94282224	YBR281C	YBR281C	2.49253731	0.0000098	889.5	I	I
YBR286W	0.1072	1.63548	0.06555	0.06555	3	1	11	YBR286W	1.82798799	11.827988	YBR286W	APE3	2.39845715	0.00000067	1805.8	I	I
YBR287W	0.08529	1.71418	0.04976	0.04976	13	0	10	YBR287W	0.511272215	10.5112722	YBR287W	YBR287W	2.44205937	0.00000009	1109.42857	I	I
YBR288C	0.16802	1.94713	0.08629	0.08629	6	0	10	YBR288C	-0.544420606	9.45557939	YBR288C	APM3	2.34009727	0.00000191	1044.91667	I	I
YBR289W	0.18674	2.05644	0.09081	0.09081	60	27	37	YBR289W	-0.648829786	9.35117021	YBR289W	TYE4	2.36542009	0.0000532	251.093023	I	I
YBR290W	0.13109	2.11794	0.06189	0.06189	51	5	15	YBR290W	-1.02296268	8.97703732	YBR290W	BSD2	2.37481134	0.00000004	1368.83333	I	I
YCL004W	0.19253	1.73859	0.11074	0.11074	1	0	10	YCL004W	-0.477714741	9.52228526	YCL004W	PGS1	2.51601543	0	3491	I	I
YCL011C	0.10804	1.49529	0.07225	0.07225	65	9	19	YCL011C	0.012428355	10.0124284	YCL011C	YCL011C	2.21851417	0.000104	358.705882	I	I
YCL016C	0.17367	1.55871	0.11142	0.11142	5	0	10	YCL016C	-0.628528001	9.371472	YCL016C	DCC1	2.41472413	0.00000017	1758.5	I	I
YCL048W	0.16661	1.88358	0.08845	0.08845	6	4	14	YCL048W	0.14293983	10.1429398	YCL048W	YCL048W	2.39979876	0.0000176	1319.75	I	I
YCL049C	0.47505	1.74079	0.27289	0.27289	0	0	10	YCL049C	0.02112912	10.0211291	YCL049C	YCL049C	2.37028341	0.0000173	2142.75	I	I
YCL050C	0.09559	1.25469	0.07619	0.07619	8	1	11	YCL050C	1.9236964	11.9236964	YCL050C	APA1	2.30152608	0.0000915	275.38806	I	I
YCL051W	0.30981	1.62486	0.19067	0.19067	7	2	12	YCL051W	-0.573423156	9.42657684	YCL051W	LRE1	2.42713399	0.00000008	1410.6	I	I
YCL052C	0.25105	1.76682	0.14209	0.14209	12	1	11	YCL052C	-0.19348975	9.80651025	YCL052C	PBN1	2.46738219	0	2760.5	I	I
YCL061C	0.44967	2.70956	0.16596	0.16596	42	20	30	YCL061C	-0.26889638	9.73110362	YCL061C	MRC1	2.35301023	0.0000304	711.933333	I	I
YCL063W	0.2041	1.68003	0.12149	0.12149	8	3	13	YCL063W	-0.582123921	9.41787608	YCL063W	VAC17	2.53731343	0.00000715	1321	I	I
YCR009C	0.00545	1.7258	0.00316	0.00316	73	8	18	YCR009C	0.343057425	10.3430574	YCR009C	RVS161	2.28274359	0.0000757	544.875	I	I
YCR011C	0.09582	1.80864	0.05298	0.05298	14	2	12	YCR011C	-0.260195615	9.73980439	YCR011C	YCR011C	2.43233272	0.0000327	678.142857	I	I
YCR012W	0.02484	0.28783	0.0863	0.0863	61	5	15	YCR012W	6.14936794	16.1493679	YCR012W	YCR012W	2.27201073	0.000154	301.508197	I	I
YCR014C	0.35896	2.09849	0.17106	0.17106	26	1	11	YCR014C	-0.329801736	9.67019827	YCR014C	YCR014C	2.41187322	0	2756.33333	I	I
YCR020C	0.22851	1.94639	0.1174	0.1174	2	0	10	YCR020C	0.62438216	10.6243822	YCR020C	PET18	2.45413383	0.00000356	1647.5	I	I
YCR027C	0.14871	2.21038	0.06728	0.06728	5	3	13	YCR027C	-0.477714741	9.52228526	YCR027C	RHB1	2.70484655	0.00000539	1223	I	I
YCR030C	0.19286	1.82127	0.1059	0.1059	52	9	19	YCR030C	0.012428355	10.0124284	YCR030C	SYP1	2.38604729	0.00000327	647.357143	I	I
YCR043C	0.16075	2.19554	0.07321	0.07321	33	2	12	YCR043C	0.569277315	10.5692773	YCR043C	YCR043C	2.31427134	0.000143	703.318182	I	I
YCR044C	0.19963	2.0891	0.09556	0.09556	13	0	10	YCR044C	-0.25149485	9.74850515	YCR044C	PER1	2.51601543	0	3491	I	I
YCR052W	0.2687	1.72933	0.15538	0.15538	53	15	25	YCR052W	-0.039776235	9.96022377	YCR052W	RSC6	2.32768741	0.0000305	292.792453	I	I
YCR053W	0.04993	1.24189	0.0402	0.0402	11	1	11	YCR053W	2.88948132	12.8894813	YCR053W	THR4	2.40164347	0.00000166	1912.4	I	I
YCR054C	0.23207	1.88893	0.12286	0.12286	0	0	10	YCR054C	-0.265996125	9.73400388	YCR054C	YCR054C	2.44390408	0.00000089	1052.28571	I	I
YCR069W	0.4151	2.42993	0.17083	0.17083	2	3	13	YCR069W	-0.138384905	9.8616151	YCR069W	CPR4	2.33925876	0.000151	869.416667	I	I
YCR076C	0.30238	1.79731	0.16824	0.16824	11	0	10	YCR076C	-0.985259366	9.01474063	YCR076C	YCR076C	2.41187322	0	2756.33333	I	I
YCR077C	0.09299	1.4567	0.06384	0.06384	86	3	13	YCR077C	0.238648245	10.2386483	YCR077C	YCR077C	2.29833976	0.000239	365.216216	I	I
YCR079W	0.1191	1.74485	0.06826	0.06826	32	3	13	YCR079W	-0.988159621	9.01184038	YCR079W	PPP2	2.40952541	0.00000002	1765.2	I	I
YCR084C	0.0566	1.43483	0.03945	0.03945	141	58	-0.077885908	YCR084C	0.244448755	10.2444488	YCR084C	AAR1	2.30840181	0.00000442	1159.15385	I	I
YCR092C	0.24934	2.05463	0.12135	0.12135	19	2	12	YCR092C	-0.657530551	9.34246945	YCR092C	MSH3	2.32936441	0.0000524	432.965517	I	I
YDL001W	0.05878	1.76691	0.03326	0.03326	12	1	11	YDL001W	-0.512517801	9.4874822	YDL001W	RMD1	2.63793393	0	1400.5	I	I
YDL002C	0.09865	1.75304	0.05628	0.05628	71	12	22	YDL002C	-0.674932081	9.32506792	YDL002C	NHP10	2.37179272	0.0000119	348.966667	I	I
YDL005C	0.33972	2.0839	0.16302	0.16302	82	64	74	YDL005C	-0.08328006	9.91671994	YDL005C	MED2	2.35250713	0.00013	218.236364	I	I
YDL015C	0.11134	1.5209	0.07321	0.07321	67	2	12	YDL015C	1.02751761	11.0275176	YDL015C	TSC13	2.35267483	0.0000515	381.689655	I	I
YDL018C	0.16836	1.50848	0.11161	0.11161	52	4	14	YDL018C	-0.315300461	9.68469954	YDL018C	ERP3	2.41522723	0.0000166	955	I	I
YDL028C	0.14679	2.20135	0.06668	0.06668	71	11	21	YDL028C	-0.535719841	9.46428016	YDL028C	RPK1	2.34479289	0.00005	989.6	I	I
YDL031W	0.1085	1.77132	0.06125	0.06125	98	18	28	YDL031W	0.482269665	10.4822697	YDL031W	YDL031W	2.29112863	0.000117	268.15493	I	I
YDL042C	0.20996	1.75365	0.11973	0.11973	78	6	16	YDL042C	-0.503817036	9.49618296	YDL042C	SIR2	2.29297334	0.000313	516.764706	I	I
YDL044C	0.36285	2.1615	0.16787	0.16787	13	8	18	YDL044C	-0.24569434	9.75430566	YDL044C	NAM1	2.43300352	0.0000718	760.444444	I	I
YDL045C	0.12	1.63925	0.0732	0.0732	1	0	10	YDL045C	-0.535719841	9.46428016	YDL045C	FAD1	2.3880597	0.000017	1810	I	I
YDL046W	0.16326	2.11699	0.07712	0.07712	3	0	10	YDL046W	0.685287515	10.6852875	YDL046W	NPC2	2.42562469	0.00000561	2167.33333	I	I
YDL052C	0.22352	1.40817	0.15873	0.15873	25	3	13	YDL052C	0.46196788	10.4619679	YDL052C	SLC1	2.39476773	0.00000581	344.580645	I	I
YDL053C	0.27155	2.0886	0.13002	0.13002	41	18	28	YDL053C	-0.570522901	9.4294771	YDL053C	PBP4	2.39359383	0.00000043	1331.28571	I	I
YDL057W	0.34771	1.90871	0.18217	0.18217	4	2	12	YDL057W	-0.727136671	9.27286333	YDL057W	YDL057W	2.63156129	0.00000828	710.25	I	I
YDL058W	0.41069	2.30939	0.17784	0.17784	48	19	29	YDL058W	0.076233965	10.076234	YDL058W	INT1	2.28140198	0.0000238	621.533333	I	I
YDL059C	0.22827	1.7296	0.13198	0.13198	47	7	17	YDL059C	-0.753238966	9.24676103	YDL059C	YDL059C	2.4071776	0.0000078	2179.5	I	I
YDL060W	0.14568	1.82379	0.07988	0.07988	60	4	14	YDL060W	0.50257145	10.5025715	YDL060W	YDL060W	2.34865001	0.0000505	308.710526	I	I
YDL073W	0.33498	1.96291	0.17065	0.17065	2	0	10	YDL073W	-0.387806836	9.61219316	YDL073W	YDL073W	2.35133322	0.0000365	756.666667	I	I
YDL078C	0.09906	1.56555	0.06328	0.06328	45	5	15	YDL078C	0.047231415	10.0472314	YDL078C	MDH3	2.3473084	0.00000562	1154.22222	I	I
YDL086W	0.03862	1.76165	0.02192	0.02192	5	0	10	YDL086W	-0.120983375	9.87901663	YDL086W	YDL086W	2.42361228	0.00000452	861.5	I	I
YDL087C	0.11388	1.67236	0.0681	0.0681	37	5	15	YDL087C	-0.953356561	9.04664344	YDL087C	EPE1	2.34999161	0.0000825	281.057143	I	I
YDL089W	0.45211	2.00039	0.22601	0.22601	11	1	11	YDL089W	-0.254395105	9.7456049	YDL089W	NUR1	2.45815864	0.00002	1494.25	I	I
YDL091C	0.21786	2.2494	0.09685	0.09685	12	3	13	YDL091C	-0.608226216	9.39177378	YDL091C	YDL091C	2.46352507	0.000425	1054.14286	I	I
YDL098C	0.33447	2.50251	0.13365	0.13365	23	2	12	YDL098C	-0.637228766	9.36277123	YDL098C	YDL098C	2.4901895	0.0000043	416.733333	I	I
YDL101C	0.11333	1.93961	0.05843	0.05843	128	61	-0.058262072	YDL101C	-0.21669179	9.78330821	YDL101C	DUN1	2.36340768	0.000347	1077.25	I	I
YDL103C	0.16339	1.86954	0.0874	0.0874	21	0	10	YDL103C	0.30535411	10.3053541	YDL103C	UAP1	2.36542009	0.00000001	1831.83333	I	I
YDL109C	0.32396	1.75417	0.18468	0.18468	3	3	13	YDL109C	-0.347203266	9.65279674	YDL109C	YDL109C	2.35485494	0.00000017	1722.42857	I	I
YDL110C	0.10385	1.68821	0.06152	0.06152	25	18	28	YDL110C	-0.010773685	9.98922632	YDL110C	TMA17	2.3466376	0	2139.16667	I	I
YDL112W	0.31786	1.97551	0.1609	0.1609	13	0	10	YDL112W	-0.010773685	9.98922632	YDL112W	TRM3	2.38151937	0.0000159	505.222222	I	I
YDL116W	0.19873	1.87806	0.10582	0.10582	48	4	14	YDL116W	-0.08908057	9.91091943	YDL116W	NUP84	2.36340768	0.000196	495.652174	I	I
YDL117W	0.14779	1.88625	0.07835	0.07835	30	3	13	YDL117W	-0.294998676	9.70500133	YDL117W	CYK3	2.43954385	0.0000387	341.666667	I	I
YDL123W	0.18958	1.57191	0.12061	0.12061	31	4	14	YDL123W	-0.512517801	9.4874822	YDL123W	SNA4	2.35636425	0.000255	148.573529	I	I
YDL142C	0.31093	1.4988	0.20746	0.20746	0	0	10	YDL142C	-1.03746396	8.96253604	YDL142C	CRD1	2.42428308	0.00000546	502.15	I	I
YDL144C	0.18513	2.01811	0.09173	0.09173	10	0	10	YDL144C	-0.651730041	9.34826996	YDL144C	YDL144C	2.33875566	0.00000791	1322.7	I	I
YDL145C	0.07014	1.51317	0.04635	0.04635	66	8	18	YDL145C	1.0217171	11.0217171	YDL145C	SEC33	2.29565655	0.000806	303.262295	I	I
YDL146W	0.17387	1.74993	0.09936	0.09936	2	3	13	YDL146W	0.006627845	10.0066279	YDL146W	LDB17	2.62099614	0	1592	I	I
YDL147W	0.077	1.71457	0.04491	0.04491	94	14	24	YDL147W	0.33435666	10.3343567	YDL147W	NAS5	2.29750126	0.000219	287.55	I	I
YDL148C	0.19141	2.09917	0.09118	0.09118	93	10	20	YDL148C	0.528673745	10.5286738	YDL148C	NOP14	2.30940802	0.0000629	280.482759	I	I
YDL150W	0.2089	1.91739	0.10895	0.10895	35	10	20	YDL150W	-0.413909131	9.58609087	YDL150W	YDL150W	2.35921516	0.0000445	443.833333	I	I
YDL155W	0.17669	1.69975	0.10395	0.10395	59	15	25	YDL155W	-0.474814486	9.52518551	YDL155W	CLB3	2.39359383	0.000018	1042.28571	I	I
YDL156W	0.12615	2.11731	0.05958	0.05958	356	81	0.072563502	YDL156W	-0.318200716	9.68179929	YDL156W	CMR1	2.33037062	0.0000143	537.625	I	I
YDL157C	0.11386	1.57502	0.07229	0.07229	1	0	10	YDL157C	0.180643145	10.1806432	YDL157C	YDL157C	2.51266141	0.0000194	1751.5	I	I
YDL165W	0.01754	1.12303	0.01562	0.01562	41	1	11	YDL165W	-0.596625196	9.4033748	YDL165W	YDL165W	2.4294818	0.000114	401.4375	I	I
YDL167C	0.27737	1.8557	0.14947	0.14947	10	15	25	YDL167C	-0.289198165	9.71080184	YDL167C	NRP1	2.39141372	0.0000162	511.055556	I	I
YDL170W	0.14837	1.97302	0.0752	0.0752	2	5	15	YDL170W	-0.654630296	9.3453697	YDL170W	UGA3	2.51601543	0	3491	I	I
YDL175C	0.17729	1.91348	0.09265	0.09265	32	8	18	YDL175C	-0.611126471	9.38887353	YDL175C	AIR2	2.30102298	0.000378	172	I	I
YDL177C	0.23812	1.91915	0.12408	0.12408	3	2	12	YDL177C	-0.396507601	9.6034924	YDL177C	YDL177C	2.51601543	0	3491	I	I
YDL179W	0.34769	1.74904	0.19879	0.19879	10	3	13	YDL179W	-0.498016526	9.50198347	YDL179W	PCL9	2.44608419	0.00000005	1733	I	I
YDL193W	0.14468	1.47692	0.09796	0.09796	10	1	11	YDL193W	0.1835434	10.1835434	YDL193W	NUS1	2.62518866	0	954.25	I	I
YDL195W	0.158	1.44419	0.1094	0.1094	43	6	16	YDL195W	0.63018267	10.6301827	YDL195W	YDL195W	2.31242663	0.0000734	329.135593	I	I
YDL197C	0.73612	2.09732	0.35098	0.35098	11	6	16	YDL197C	-0.637228766	9.36277123	YDL197C	ASF2	2.31930236	0.0000231	1383	I	I
YDL199C	0.24058	1.91125	0.12588	0.12588	19	2	12	YDL199C	-0.732937181	9.26706282	YDL199C	YDL199C	2.33473084	0.00000029	1523.75	I	I
YDL200C	0.33647	2.27455	0.14793	0.14793	24	2	12	YDL200C	-0.515418056	9.48458194	YDL200C	MGT1	2.40617139	0	2199	I	I
YDL201W	0.0645	1.77313	0.03638	0.03638	8	0	10	YDL201W	0.19514442	10.1951444	YDL201W	TRM8	2.38470569	0.00000057	2143	I	I
YDL203C	0.22534	1.98497	0.11352	0.11352	24	0	10	YDL203C	-0.654630296	9.3453697	YDL203C	YDL203C	2.30924032	0.0000532	623.590909	I	I
YDL204W	0.34571	2.17727	0.15878	0.15878	18	8	18	YDL204W	0.45036686	10.4503669	YDL204W	RTN2	2.46687909	0.00000163	516.1	I	I
YDL205C	0.05172	1.44245	0.03586	0.03586	0	0	10	YDL205C	0.499671195	10.4996712	YDL205C	HEM3	2.46402817	0	2965	I	I
YDL214C	0.37291	1.98757	0.18762	0.18762	87	27	37	YDL214C	-0.321100971	9.67889903	YDL214C	YDL214C	2.41187322	0	2756.33333	I	I
YDL215C	0.04656	1.96385	0.02371	0.02371	18	0	10	YDL215C	0.62438216	10.6243822	YDL215C	YDL215C	2.37430823	0.0000177	496.565217	I	I
YDL216C	0.28048	2.29212	0.12237	0.12237	6	2	12	YDL216C	-0.567622646	9.43237735	YDL216C	JAB1	2.46704679	0.0000424	486.2	I	I
YDL225W	0.11972	1.95609	0.0612	0.0612	67	11	21	YDL225W	0.151640595	10.1516406	YDL225W	SHS1	2.3266812	0.0000471	467.607143	I	I
YDL226C	0.16703	2.05683	0.08121	0.08121	21	2	12	YDL226C	-0.132584395	9.86741561	YDL226C	YDL226C	2.35435184	0.0000149	1696.28571	I	I
YDL236W	0.10384	1.87637	0.05534	0.05534	15	3	13	YDL236W	0.6475842	10.6475842	YDL236W	PHO13	2.40466208	0.00000001	1434.83333	I	I
YDL238C	0.25431	1.91114	0.13307	0.13307	2	1	11	YDL238C	-0.500916781	9.49908322	YDL238C	YDL238C	2.41019621	0	2892.66667	I	I
YDR001C	0.04323	1.84996	0.02337	0.02337	29	1	11	YDR001C	0.064632945	10.064633	YDR001C	YDR001C	2.33674325	0.0000177	647.681818	I	I
YDR003W	0.22116	2.00476	0.11032	0.11032	4	3	13	YDR003W	-1.04326447	8.95673553	YDR003W	YDR003W	2.45564313	0.00000176	2025.66667	I	I
YDR004W	0.18936	1.74106	0.10876	0.10876	8	1	11	YDR004W	-0.715535651	9.28446435	YDR004W	YDR004W	2.43417743	0.0000012	1291.6	I	I
YDR032C	0.01701	1.54368	0.01102	0.01102	87	2	12	YDR032C	2.13251476	12.1325148	YDR032C	PST2	2.36290458	0.000111	802.285714	I	I
YDR033W	0.11651	1.04931	0.11103	0.11103	38	0	10	YDR033W	3.55073946	13.5507395	YDR033W	YDR033W	2.64011404	0	2748	I	I
YDR036C	0.17769	1.60735	0.11055	0.11055	23	1	11	YDR036C	0.25314952	10.2531495	YDR036C	EHD3	2.35049472	0.000119	412.965517	I	I
YDR049W	0.30691	2.24556	0.13667	0.13667	10	3	13	YDR049W	-0.23409332	9.76590668	YDR049W	YDR049W	2.36105987	0.0000113	1377.5	I	I
YDR052C	0.21642	1.74678	0.1239	0.1239	24	5	15	YDR052C	-0.20509077	9.79490923	YDR052C	DBF4	2.40650679	0.00000398	1419.66667	I	I
YDR054C	0.02102	1.59865	0.01315	0.01315	64	15	25	YDR054C	0.3575587	10.3575587	YDR054C	CDC34	2.27502935	0.000136	676.192308	I	I
YDR055W	0.15685	1.80954	0.08668	0.08668	12	2	12	YDR055W	0.940509955	10.94051	YDR055W	YDR055W	2.44256247	0.00000037	999.666667	I	I
YDR056C	0.27939	1.92128	0.14542	0.14542	3	0	10	YDR056C	0.395262015	10.395262	YDR056C	YDR056C	2.46369277	0	1878.66667	I	I
YDR058C	0.11492	2.27557	0.0505	0.0505	1	0	10	YDR058C	-0.402308111	9.59769189	YDR058C	YDR058C	2.3880597	0	1495.6	I	I
YDR061W	0.2022	1.83371	0.11027	0.11027	10	0	10	YDR061W	-0.825745341	9.17425466	YDR061W	YDR061W	2.35720275	0.0000366	825.916667	I	I
YDR063W	0.14188	1.93615	0.07328	0.07328	8	8	18	YDR063W	-0.225392555	9.77460745	YDR063W	AIM7	2.34563139	0.000371	1316.55556	I	I
YDR068W	0.43389	2.67799	0.16202	0.16202	36	29	39	YDR068W	0.06173269	10.0617327	YDR068W	YDR068W	2.33875566	0.000018	481.903226	I	I
YDR073W	0.20333	1.6257	0.12507	0.12507	45	30	40	YDR073W	-1.26368385	8.73631615	YDR073W	YDR073W	2.32768741	0.0000649	591.478261	I	I
YDR076W	0.21101	1.90231	0.11092	0.11092	10	1	11	YDR076W	-0.663331061	9.33666894	YDR076W	YDR076W	2.41002851	0.0000019	2170.75	I	I
YDR083W	0.15943	1.90185	0.08383	0.08383	15	0	10	YDR083W	0.418464055	10.4184641	YDR083W	YDR083W	2.33406004	0.00000433	956.538462	I	I
YDR084C	0.09415	1.67243	0.05629	0.05629	8	0	10	YDR084C	-0.01947445	9.98052555	YDR084C	YDR084C	2.34110347	0.000016	874.307692	I	I
YDR087C	0.228	1.7285	0.1319	0.1319	110	24	-0.300289384	YDR087C	0.14293983	10.1429398	YDR087C	YDR087C	2.3870535	0.0000229	488.470588	I	I
YDR099W	0.04819	1.22182	0.03944	0.03944	202	22	-0.313371941	YDR099W	2.21662216	12.2166222	YDR099W	YDR099W	2.30806641	0.000377	481	I	I
YDR109C	0.39127	2.21526	0.17662	0.17662	3	2	12	YDR109C	-0.434210916	9.56578908	YDR109C	YDR109C	2.46033876	0	2406	I	I
YDR111C	0.16895	1.99181	0.08482	0.08482	17	1	11	YDR111C	-0.028175215	9.97182479	YDR111C	ALT2	2.43250042	0	1701.25	I	I
YDR113C	0.34711	2.04188	0.17	0.17	37	5	15	YDR113C	-0.556021626	9.44397837	YDR113C	PDS1	2.3070602	0.000194	1035.5	I	I
YDR117C	0.2554	2.04556	0.12485	0.12485	5	0	10	YDR117C	-0.016574195	9.98342581	YDR117C	TMA64	2.32332718	0.00000446	1085.07692	I	I
YDR120C	0.09536	2.00364	0.0476	0.0476	19	0	10	YDR120C	0.018228865	10.0182289	YDR120C	TRM1	2.36156297	0.00000094	776.866667	I	I
YDR125C	0.24627	2.13129	0.11555	0.11555	2	0	10	YDR125C	-0.515418056	9.48458194	YDR125C	YDR125C	2.31343284	0.0000004	1640.77778	I	I
YDR127W	0.07674	1.69526	0.04527	0.04527	53	1	11	YDR127W	0.662085475	10.6620855	YDR127W	YDR127W	2.2458494	0.000243	231.550459	I	I
YDR137W	0.29328	2.08428	0.14071	0.14071	15	1	11	YDR137W	-0.582123921	9.41787608	YDR137W	RGP1	2.35099782	0.00000156	1015.18182	I	I
YDR143C	0.38553	1.95644	0.19705	0.19705	76	16	26	YDR143C	-0.431310661	9.56868934	YDR143C	YDR143C	2.48868019	0	762	I	I
YDR152W	0.16873	1.75568	0.09611	0.09611	28	17	27	YDR152W	0.27635156	10.2763516	YDR152W	GIR2	2.37430823	0.00000247	1026.63636	I	I
YDR158W	0.03817	1.35956	0.02807	0.02807	18	0	10	YDR158W	3.02289305	13.0228931	YDR158W	YDR158W	2.32332718	0.0000374	636.631579	I	I
YDR159W	0.35271	2.32075	0.15198	0.15198	80	19	29	YDR159W	-0.434210916	9.56578908	YDR159W	YDR159W	2.33758175	0.00000495	908.642857	I	I
YDR161W	0.16517	1.98695	0.08313	0.08313	10	5	15	YDR161W	-0.23989383	9.76010617	YDR161W	ACL4	2.39610934	0.0000106	327.897436	I	I
YDR164C	0.12586	1.92388	0.06542	0.06542	30	5	15	YDR164C	-0.17028771	9.82971229	YDR164C	YDR164C	2.45161831	0.0000672	414	I	I
YDR168W	0.17419	1.84292	0.09452	0.09452	57	20	30	YDR168W	0.511272215	10.5112722	YDR168W	YDR168W	2.32433339	0.0000561	370.611111	I	I
YDR169C	0.15743	1.87362	0.08403	0.08403	31	4	14	YDR169C	-0.744538201	9.2554618	YDR169C	STB3	2.29012242	0.0000292	1432.8	I	I
YDR170C	0.09127	1.75517	0.052	0.052	69	11	21	YDR170C	0.372059975	10.37206	YDR170C	SEC7	2.2656381	0.000248	360.464286	I	I
YDR178W	0.14286	1.66056	0.08603	0.08603	10	0	10	YDR178W	0.22994748	10.2299475	YDR178W	ACN18	2.48767399	0.0000347	876.5	I	I
YDR179W-A	0.47241	1.84145	0.25654	0.25654	1	0	10	YDR179W-A	-0.579223666	9.42077633	YDR179W-A	YDR179W-A	2.51601543	0	3491	I	I
YDR182W	0.26346	1.82456	0.1444	0.1444	1	1	11	YDR182W	-0.355904031	9.64409597	YDR182W	CDC1	2.38135167	0.00000044	2161.2	I	I
YDR183W	0.29978	2.62576	0.11417	0.11417	3	6	16	YDR183W	-0.364604796	9.63539521	YDR183W	PLP1	2.90508133	0	1321	I	I
YDR189W	0.07542	1.73019	0.04359	0.04359	27	1	11	YDR189W	0.482269665	10.4822697	YDR189W	YDR189W	2.42176757	0.00000318	1077.25	I	I
YDR190C	0.04195	1.76043	0.02383	0.02383	158	5	-0.424573679	YDR190C	0.470668645	10.4706687	YDR190C	TIP49A	2.24601711	0.00041	177.316547	I	I
YDR191W	0.15711	1.78685	0.08793	0.08793	2	0	10	YDR191W	-0.579223666	9.42077633	YDR191W	HST4	2.35468724	0.00000461	1249	I	I
YDR194C	0.15254	2.07346	0.07357	0.07357	47	16	26	YDR194C	0.54897553	10.5489755	YDR194C	YDR194C	2.32466879	0.000062	412.176471	I	I
YDR201W	0.17245	1.80372	0.09561	0.09561	55	20	30	YDR201W	-0.048477	9.951523	YDR201W	YDR201W	2.35334563	0.00000148	1709.57143	I	I
YDR202C	0.12031	1.79051	0.0672	0.0672	6	0	10	YDR202C	-0.26309587	9.73690413	YDR202C	YDR202C	2.306054	0.0000592	585.052632	I	I
YDR207C	0.26411	1.45525	0.18149	0.18149	50	2	12	YDR207C	-0.21669179	9.78330821	YDR207C	CAR80	2.34512829	0.0000177	1001.58333	I	I
YDR217C	0.45247	1.94502	0.23263	0.23263	14	1	11	YDR217C	-0.619827236	9.38017276	YDR217C	RAD9	2.33355693	0.00000006	1945.16667	I	I
YDR219C	0.29032	2.11709	0.13713	0.13713	6	6	16	YDR219C	-0.640129021	9.35987098	YDR219C	MFB1	2.31829616	0.0000354	1396.11111	I	I
YDR229W	0.17553	1.8203	0.09643	0.09643	80	13	23	YDR229W	-0.924354011	9.07564599	YDR229W	IVY1	2.36525239	0.0000391	434.9	I	I
YDR240C	0.38442	1.90001	0.20232	0.20232	32	0	10	YDR240C	-0.761939731	9.23806027	YDR240C	YDR240C	2.36474929	0.0000202	348	I	I
YDR245W	0.14055	1.71186	0.0821	0.0821	26	0	10	YDR245W	-0.155786435	9.84421357	YDR245W	YDR245W	2.42478618	0.0000428	376.904762	I	I
YDR248C	0.12802	2.23362	0.05732	0.05732	5	0	10	YDR248C	0.11393728	10.1139373	YDR248C	YDR248C	2.41187322	0	2756.33333	I	I
YDR255C	0.1424	2.10819	0.06755	0.06755	5	1	11	YDR255C	-0.297898931	9.70210107	YDR255C	GID2	2.35804125	0.00000827	1379.28571	I	I
YDR266C	0.18047	1.93205	0.09341	0.09341	26	2	12	YDR266C	-0.149985925	9.85001408	YDR266C	HEL2	2.32315948	0.0000219	1452.75	I	I
YDR268W	0.13529	1.63811	0.08259	0.08259	0	1	11	YDR268W	-0.080379805	9.9196202	YDR268W	MSW1	2.5919839	0.00000506	734.666667	I	I
YDR272W	0.22147	2.34693	0.09437	0.09437	10	0	10	YDR272W	0.099436005	10.099436	YDR272W	GLO2	2.35921516	0.00000463	928	I	I
YDR273W	0.63234	2.43475	0.25971	0.25971	12	6	16	YDR273W	-0.512517801	9.4874822	YDR273W	DON1	2.37246353	0.0000559	812.777778	I	I
YDR277C	0.12508	1.74532	0.07166	0.07166	30	4	14	YDR277C	-0.811244066	9.18875593	YDR277C	MTH1	2.5314439	0	1443	I	I
YDR295C	0.29734	1.97096	0.15086	0.15086	129	29	-0.267582991	YDR295C	-0.422609896	9.5773901	YDR295C	YDR295C	2.30957572	0.0000275	1169.4	I	I
YDR297W	0.08603	1.66539	0.05166	0.05166	43	4	14	YDR297W	0.621481905	10.6214819	YDR297W	SYR2	2.34093577	0.0000681	522.909091	I	I
YDR302W	0.10447	1.69214	0.06174	0.06174	0	0	10	YDR302W	-0.196390005	9.80361	YDR302W	YDR302W	2.387892	0.000001	1759.4	I	I
YDR304C	0.1154	1.87759	0.06146	0.06146	94	17	27	YDR304C	1.04781939	11.0478194	YDR304C	CYP5	2.51215831	0	1768	I	I
YDR306C	0.14655	1.63283	0.08975	0.08975	10	0	10	YDR306C	-0.442911681	9.55708832	YDR306C	YDR306C	2.2857622	0.00000971	924.65	I	I
YDR308C	0.0615	1.76605	0.03482	0.03482	53	38	48	YDR308C	-0.338502501	9.6614975	YDR308C	YDR308C	2.39896025	0.0000388	527.882353	I	I
YDR310C	0.28173	1.99809	0.141	0.141	32	5	15	YDR310C	-0.277597145	9.72240286	YDR310C	SUM1	2.29196713	0.0000383	677.130435	I	I
YDR321W	0.11154	1.92257	0.05802	0.05802	5	3	13	YDR321W	0.279251815	10.2792518	YDR321W	YDR321W	2.36542009	0.0000685	565.52381	I	I
YDR322W	0.20898	1.68328	0.12415	0.12415	30	1	11	YDR322W	-0.074579295	9.92542071	YDR322W	YDR322W	2.32265638	0.000092	560.35	I	I
YDR326C	0.19267	2.04424	0.09425	0.09425	49	14	24	YDR326C	-0.265996125	9.73400388	YDR326C	YSP2	2.37900386	0.00000012	1919.2	I	I
YDR334W	0.2258	2.05856	0.10969	0.10969	50	11	21	YDR334W	-0.21669179	9.78330821	YDR334W	SWR1	2.28827771	0.0000497	358.851852	I	I
YDR337W	0.12177	1.72375	0.07064	0.07064	36	1	11	YDR337W	-0.321100971	9.67889903	YDR337W	YDR337W	2.30119068	0.0000516	573.464286	I	I
YDR347W	0.19868	1.73921	0.11424	0.11424	35	0	10	YDR347W	-0.657530551	9.34246945	YDR347W	MRP1	2.26949522	0.000154	563.870968	I	I
YDR349C	0.28433	1.77538	0.16015	0.16015	5	3	13	YDR349C	-0.596625196	9.4033748	YDR349C	YPS7	2.78433674	0	2030	I	I
YDR353W	0.06314	1.41119	0.04474	0.04474	22	0	10	YDR353W	1.9497987	11.9497987	YDR353W	YDR353W	2.40298507	0.0000514	961.6	I	I
YDR354W	0.17717	1.67582	0.10572	0.10572	8	1	11	YDR354W	-0.184788985	9.81521102	YDR354W	YDR354W	2.36978031	0	1468.375	I	I
YDR356W	0.29964	2.65105	0.11303	0.11303	126	37	-0.215252761	YDR356W	-0.22829281	9.77170719	YDR356W	SPC110	2.33187993	0.0000372	525.125	I	I
YDR357C	0.15395	1.52567	0.10091	0.10091	22	18	28	YDR357C	-0.184788985	9.81521102	YDR357C	YDR357C	2.43870535	0.0000133	1040.16667	I	I
YDR358W	0.35669	2.16037	0.16511	0.16511	41	1	11	YDR358W	-0.26309587	9.73690413	YDR358W	GGA1	2.38168707	0.00000076	1471.42857	I	I
YDR361C	0.11844	1.89864	0.06238	0.06238	24	4	14	YDR361C	0.5895791	10.5895791	YDR361C	YDR361C	2.39678014	0.000546	378.181818	I	I
YDR369C	0.72835	2.2966	0.31714	0.31714	18	2	12	YDR369C	-0.379106071	9.62089393	YDR369C	XRS2	2.42210297	0.00000386	579.416667	I	I
YDR372C	0.06281	1.41985	0.04424	0.04424	21	6	16	YDR372C	0.46776839	10.4677684	YDR372C	YDR372C	2.42428308	0.00000263	1054.125	I	I
YDR386W	0.24252	2.36851	0.10239	0.10239	33	2	12	YDR386W	-0.593724941	9.40627506	YDR386W	MUS81	2.39879255	0.00000227	1891	I	I
YDR392W	0.04601	1.88866	0.02436	0.02436	34	9	19	YDR392W	-0.27469689	9.72530311	YDR392W	SPT3	2.36625859	0.00000587	381.793104	I	I
YDR393W	0.26827	1.68661	0.15906	0.15906	41	5	15	YDR393W	-0.405208366	9.59479163	YDR393W	MDM33	2.33473084	0.0000339	808.714286	I	I
YDR398W	0.15791	1.66102	0.09507	0.09507	41	6	16	YDR398W	0.23574799	10.235748	YDR398W	YDR398W	2.36558779	0.0000154	419.521739	I	I
YDR399W	0.05413	1.34781	0.04016	0.04016	6	2	12	YDR399W	1.56696504	11.566965	YDR399W	YDR399W	2.57521382	0.0000119	765.4	I	I
YDR400W	0.17522	1.98289	0.08837	0.08837	4	0	10	YDR400W	-0.434210916	9.56578908	YDR400W	URH1	2.4898541	0.00000314	1794	I	I
YDR427W	0.08292	1.62187	0.05112	0.05112	58	8	18	YDR427W	0.650484455	10.6504845	YDR427W	NAS7	2.31343284	0.000064	299.722222	I	I
YDR436W	0.16798	1.7657	0.09513	0.09513	99	35	45	YDR436W	-0.709735141	9.29026486	YDR436W	YDR436W	2.39862485	0.0000696	981	I	I
YDR440W	0.32213	1.94299	0.16579	0.16579	20	3	13	YDR440W	-0.721336161	9.27866384	YDR440W	KMT4	2.36189837	0.00000082	1184.90909	I	I
YDR444W	0.1958	1.91254	0.10238	0.10238	0	0	10	YDR444W	-0.730036926	9.26996307	YDR444W	YDR444W	2.30202918	0.00000107	1477.36364	I	I
YDR449C	0.10615	1.86654	0.05687	0.05687	58	7	17	YDR449C	0.31115462	10.3111546	YDR449C	YDR449C	2.29247023	0.000079	235.19403	I	I
YDR451C	0.27828	1.73102	0.16076	0.16076	11	1	11	YDR451C	-0.628528001	9.371472	YDR451C	YHP1	2.37045112	0.00000178	611.352941	I	I
YDR452W	0.25812	2.14107	0.12056	0.12056	10	2	12	YDR452W	-0.21089128	9.78910872	YDR452W	PHM5	2.36575549	0.00000319	638.733333	I	I
YDR454C	0.10948	1.79746	0.06091	0.06091	5	0	10	YDR454C	1.77288314	11.7728831	YDR454C	GUK1	2.38168707	0.00000018	1542	I	I
YDR456W	0.07801	1.63543	0.0477	0.0477	20	2	12	YDR456W	0.02692963	10.0269296	YDR456W	VPL27	2.4480966	0.00000816	2051	I	I
YDR458C	0.46019	2.39503	0.19214	0.19214	12	4	14	YDR458C	-0.309499951	9.69050005	YDR458C	YDR458C	2.39309073	0.0000454	851.25	I	I
YDR463W	0.28297	2.08527	0.1357	0.1357	10	1	11	YDR463W	-0.402308111	9.59769189	YDR463W	STP1	2.29314104	0.000104	1113.25	I	I
YDR465C	0.22546	1.67575	0.13454	0.13454	12	0	10	YDR465C	0.261850285	10.2618503	YDR465C	YDR465C	2.37011571	0.0000945	1105.625	I	I
YDR476C	0.17976	1.77047	0.10153	0.10153	5	2	12	YDR476C	-0.663331061	9.33666894	YDR476C	YDR476C	2.58276036	0.0000734	644.833333	I	I
YDR477W	0.05921	1.75212	0.03379	0.03379	370	158	0.576241961	YDR477W	0.55477604	10.554776	YDR477W	SNF1	2.3063894	0.0000953	581	I	I
YDR478W	0.58571	2.81894	0.20778	0.20778	8	0	10	YDR478W	-0.898251716	9.10174828	YDR478W	SNM1	2.29599195	0.000112	682.357143	I	I
YDR480W	0.43376	1.83263	0.23669	0.23669	37	7	17	YDR480W	-0.495116271	9.50488373	YDR480W	DIG2	2.37497904	0.000584	346.083333	I	I
YDR481C	0.16731	1.70024	0.0984	0.0984	7	2	12	YDR481C	-0.11808312	9.88191688	YDR481C	PHO8	2.54972329	0	2389	I	I
YDR482C	0.23155	1.44042	0.16075	0.16075	57	25	35	YDR482C	-1.73352516	8.26647484	YDR482C	CWC21	2.29934597	0.0000155	808.6	I	I
YDR483W	0.2632	2.01838	0.1304	0.1304	47	6	16	YDR483W	1.17543061	11.1754306	YDR483W	KRE2	2.39309073	0.0000138	626	I	I
YDR484W	0.17733	2.25136	0.07876	0.07876	26	5	15	YDR484W	-0.379106071	9.62089393	YDR484W	VPS52	2.3463022	0.000122	1113.09091	I	I
YDR485C	0.46702	2.43277	0.19197	0.19197	28	3	13	YDR485C	-0.361704541	9.63829546	YDR485C	SWC2	2.29230253	0.0000708	612.304348	I	I
YDR486C	0.06116	2.08839	0.02928	0.02928	64	26	36	YDR486C	0.024029375	10.0240294	YDR486C	CHM5	2.37715915	0.00000596	1594	I	I
YDR487C	0.07789	1.79729	0.04334	0.04334	2	0	10	YDR487C	0.56637706	10.5663771	YDR487C	YDR487C	2.39325843	0.00000032	1999	I	I
YDR489W	0.09843	1.64314	0.0599	0.0599	33	4	14	YDR489W	0.082034475	10.0820345	YDR489W	YDR489W	2.43736374	0.0000179	502.461539	I	I
YDR490C	0.30623	1.70116	0.18001	0.18001	63	30	40	YDR490C	-0.727136671	9.27286333	YDR490C	PKH1	2.31527754	0.00000078	1527.22222	I	I
YDR492W	0.10808	1.90961	0.0566	0.0566	2	0	10	YDR492W	0.145840085	10.1458401	YDR492W	YDR492W	2.51601543	0	3491	I	I
YDR498C	0.29169	1.86387	0.1565	0.1565	19	0	10	YDR498C	-0.309499951	9.69050005	YDR498C	YDR498C	2.38940131	0.000145	563.8	I	I
YDR502C	0.02729	1.34782	0.02025	0.02025	102	3	-0.437656237	YDR502C	3.80016139	13.8001614	YDR502C	YDR502C	2.26765051	0.0000528	698.24	I	I
YDR505C	0.22983	1.91595	0.11996	0.11996	25	4	14	YDR505C	-0.033975725	9.96602428	YDR505C	YDR505C	2.31443904	0.0000094	1168.30769	I	I
YDR511W	0.21552	1.96905	0.10945	0.10945	0	6	16	YDR511W	-0.390707091	9.60929291	YDR511W	ACN9	2.48616468	0.0000236	1259	I	I
YDR515W	0.59966	2.51135	0.23878	0.23878	491	45	-0.162922531	YDR515W	-0.207991025	9.79200898	YDR515W	SLF1	2.30236458	0.0000347	692.375	I	I
YDR516C	0.02889	1.54793	0.01866	0.01866	31	1	11	YDR516C	0.261850285	10.2618503	YDR516C	YDR516C	2.36206607	0.0000116	884.928571	I	I
YDR518W	0.20062	1.78252	0.11255	0.11255	36	0	10	YDR518W	0.337256915	10.3372569	YDR518W	YDR518W	2.51349992	0	1757	I	I
YDR520C	0.27491	2.26013	0.12164	0.12164	9	1	11	YDR520C	-0.619827236	9.38017276	YDR520C	YDR520C	2.33372464	0.000122	836.384615	I	I
YDR527W	0.23136	2.52091	0.09178	0.09178	2	11	21	YDR527W	-0.03687598	9.96312402	YDR527W	YDR527W	2.37564984	0.00000382	947.454546	I	I
YDR528W	0.32949	1.86882	0.17631	0.17631	8	1	11	YDR528W	-0.155786435	9.84421357	YDR528W	HLR1	2.58561127	0.00000017	1309.66667	I	I
YDR532C	0.3315	2.32509	0.14257	0.14257	21	13	23	YDR532C	-0.538620096	9.4613799	YDR532C	KRE28	2.33808486	0.0000709	931.928571	I	I
YEL001C	0.33067	1.83002	0.18069	0.18069	13	0	10	YEL001C	-0.086180315	9.91381969	YEL001C	IRC22	2.36910951	0.00000002	1798.85714	I	I
YEL015W	0.09486	1.58219	0.05996	0.05996	54	8	18	YEL015W	-0.097781335	9.90221867	YEL015W	YEL015W	2.31796076	0.0000318	708.333333	I	I
YEL016C	0.39379	1.7524	0.22472	0.22472	1	0	10	YEL016C	-0.672031826	9.32796817	YEL016C	NPP2	2.41103471	0.00000222	2072.75	I	I
YEL019C	0.2383	2.02101	0.11791	0.11791	6	0	10	YEL019C	-0.367505051	9.63249495	YEL019C	MMS21	2.37950696	0.00000905	1385.625	I	I
YEL020C	0.18933	2.0571	0.09204	0.09204	1	0	10	YEL020C	-0.648829786	9.35117021	YEL020C	YEL020C	2.38504109	0	2677	I	I
YEL023C	0.2463	2.01022	0.12253	0.12253	21	1	11	YEL023C	-0.506717291	9.49328271	YEL023C	YEL023C	2.45245682	0.00000035	1626.5	I	I
YEL031W	0.06205	1.49289	0.04156	0.04156	8	1	11	YEL031W	1.30884234	11.3088423	YEL031W	YEL031W	2.37145732	0.00000493	1190.5	I	I
YEL037C	0.1405	1.59459	0.08811	0.08811	84	21	31	YEL037C	0.163241615	10.1632416	YEL037C	YEL037C	2.31410364	0.0000147	524.65625	I	I
YEL040W	0.19771	1.70644	0.11586	0.11586	6	0	10	YEL040W	1.16672985	11.1667299	YEL040W	YEL040W	2.39812175	0.00000002	1845.2	I	I
YEL042W	0.33278	2.00967	0.16559	0.16559	9	2	12	YEL042W	0.604080375	10.6040804	YEL042W	YEL042W	2.31913466	0.000136	1153	I	I
YEL047C	0.10289	1.67405	0.06146	0.06146	10	0	10	YEL047C	1.19863265	11.1986327	YEL047C	FRD1	2.42394768	0.00000222	802.25	I	I
YEL048C	0.28662	1.83651	0.15607	0.15607	25	8	18	YEL048C	-0.109382355	9.89061765	YEL048C	YEL048C	2.35032702	0.0000866	693.384615	I	I
YEL052W	0.12667	1.75884	0.07202	0.07202	2	0	10	YEL052W	-0.503817036	9.49618296	YEL052W	AFG1	2.35787355	0.00000094	1607.5	I	I
YEL053C	0.2331	1.771	0.13162	0.13162	14	2	12	YEL053C	-0.196390005	9.80361	YEL053C	NAA35	2.42528928	0.0000303	863.5	I	I
YEL055C	0.22577	1.84804	0.12217	0.12217	24	2	12	YEL055C	-0.033975725	9.96602428	YEL055C	POL5	2.26379339	0.0000199	576.970588	I	I
YEL056W	0.167	1.7719	0.09425	0.09425	28	9	19	YEL056W	-0.213791535	9.78620847	YEL056W	HAT2	2.36072447	0.0000074	957.416667	I	I
YEL058W	0.17411	1.76243	0.09879	0.09879	6	2	12	YEL058W	-0.022374705	9.9776253	YEL058W	PCM1	2.40466208	0.0000346	1594.2	I	I
YEL060C	0.1173	1.61358	0.0727	0.0727	34	1	11	YEL060C	1.66847396	11.668474	YEL060C	PRB1	2.37481134	0.0000173	1133	I	I
YEL061C	0.13172	2.28736	0.05758	0.05758	45	18	28	YEL061C	-0.14708567	9.85291433	YEL061C	YEL061C	2.28274359	0.0000127	870.090909	I	I
YER004W	0.20702	1.78956	0.11568	0.11568	7	0	10	YER004W	-0.541520351	9.45847965	YER004W	FMP52	2.43803455	0	1609	I	I
YER006W	0.08363	1.43863	0.05813	0.05813	134	17	-0.346078335	YER006W	0.9376097	10.9376097	YER006W	YER006W	2.30202918	0.0000634	261.366197	I	I
YER007W	0.48106	1.98857	0.24191	0.24191	10	4	14	YER007W	-0.567622646	9.43237735	YER007W	PAC2	2.36860641	0.00000008	2023.2	I	I
YER013W	0.15201	1.94814	0.07803	0.07803	118	58	-0.077885908	YER013W	-0.341402756	9.65859725	YER013W	PRP22	2.29196713	0.000105	796.095238	I	I
YER014W	0.20419	1.75245	0.11652	0.11652	4	0	10	YER014W	-0.393607346	9.60639265	YER014W	HEM14	2.45111521	0	2112.66667	I	I
YER015W	0.15157	1.87954	0.08064	0.08064	7	1	11	YER015W	0.024029375	10.0240294	YER015W	YER015W	2.54569847	0.0000118	1026.25	I	I
YER016W	0.19027	1.86507	0.10202	0.10202	30	4	14	YER016W	-0.877949931	9.12205007	YER016W	BIM1	2.38520879	0.000142	874.363636	I	I
YER021W	0.08742	1.37216	0.06371	0.06371	87	5	15	YER021W	0.56637706	10.5663771	YER021W	SUN2	2.28978702	0.0000535	429.02381	I	I
YER022W	0.19111	2.05071	0.09319	0.09319	62	12	22	YER022W	-0.10068159	9.89931841	YER022W	SRB4	2.31695455	0.0000621	445.405405	I	I
YER023W	0.05845	1.47918	0.03952	0.03952	16	1	11	YER023W	0.67658675	10.6765868	YER023W	PRO3	2.33204763	0.00000988	1125	I	I
YER025W	0.02171	1.2279	0.01768	0.01768	83	4	14	YER025W	2.03390609	12.0339061	YER025W	YER025W	2.2859299	0.000133	287.676056	I	I
YER026C	0.07163	1.69676	0.04221	0.04221	24	4	14	YER026C	0.17194238	10.1719424	YER026C	PSS1	2.63826933	0.00000586	1379	I	I
YER033C	0.42929	2.36115	0.18181	0.18181	22	7	17	YER033C	-0.367505051	9.63249495	YER033C	ZRG8	2.47895355	0.00000032	1436	I	I
YER035W	0.42541	1.52516	0.27893	0.27893	10	4	14	YER035W	-1.04036421	8.95963579	YER035W	YER035W	2.43920845	0.00000007	1135	I	I
YER037W	0.17011	1.91012	0.08906	0.08906	0	6	16	YER037W	-0.17608822	9.82391178	YER037W	PHM8	2.41573034	0.0000295	1150.25	I	I
YER040W	0.17228	1.67203	0.10303	0.10303	37	7	17	YER040W	-0.599525451	9.40047455	YER040W	YER040W	2.40181117	0.0000005	1101	I	I
YER043C	0.04044	0.88531	0.04568	0.04568	33	3	13	YER043C	4.78044758	14.7804476	YER043C	SAH1	2.5096428	0.00000152	973.8	I	I
YER047C	0.29776	2.09176	0.14235	0.14235	41	21	31	YER047C	-0.477714741	9.52228526	YER047C	YER047C	2.45866175	0.00000418	573.375	I	I
YER051W	0.35266	1.9441	0.1814	0.1814	2	0	10	YER051W	-0.529919331	9.47008067	YER051W	YER051W	2.3877243	0	2320.25	I	I
YER052C	0.04192	1.62061	0.02586	0.02586	20	4	14	YER052C	1.14932832	11.1493283	YER052C	HOM3	2.40181117	0.00000289	1272.85714	I	I
YER059W	0.21516	1.81076	0.11882	0.11882	17	4	14	YER059W	-0.857648146	9.14235185	YER059W	PCL6	2.29649505	0.00000641	937.105263	I	I
YER062C	0.03766	1.87857	0.02005	0.02005	47	3	13	YER062C	2.08031017	12.0803102	YER062C	HOR2	2.47979205	0.00000709	769.8	I	I
YER063W	0.38866	2.06593	0.18813	0.18813	36	21	31	YER063W	0.621481905	10.6214819	YER063W	THO1	2.44658729	0.00000001	1423	I	I
YER068W	0.10483	1.77172	0.05917	0.05917	59	7	17	YER068W	-0.016574195	9.98342581	YER068W	MOT2	2.40919001	0.0000609	466.666667	I	I
YER070W	0.04808	1.48719	0.03233	0.03233	36	2	12	YER070W	1.66847396	11.668474	YER070W	RIR1	2.31276203	0.0000286	632.555556	I	I
YER072W	0.01888	1.29314	0.0146	0.0146	24	2	12	YER072W	-0.25729536	9.74270464	YER072W	YER072W	2.35401643	0.000117	535.764706	I	I
YER078C	0.14529	1.92594	0.07544	0.07544	10	3	13	YER078C	-0.1064821	9.8935179	YER078C	ICP55	2.39862485	0.00000005	1926	I	I
YER079W	0.2154	2.27898	0.09452	0.09452	15	13	23	YER079W	0.012428355	10.0124284	YER079W	YER079W	2.5108167	0.00000778	1188	I	I
YER080W	0.15621	1.90337	0.08207	0.08207	0	0	10	YER080W	0.551875785	10.5518758	YER080W	YER080W	2.39745095	0.00000026	1519.6	I	I
YER082C	0.08809	1.69864	0.05186	0.05186	82	4	14	YER082C	0.03273014	10.0327301	YER082C	UTP7	2.37749455	0.0000492	198.26	I	I
YER083C	0.2207	1.58052	0.13964	0.13964	4	4	14	YER083C	-0.532819586	9.46718041	YER083C	RMD7	2.33842026	0.0000497	877.25	I	I
YER086W	0.03312	1.44927	0.02285	0.02285	37	0	10	YER086W	1.26823877	11.2682388	YER086W	ILV1	2.31074962	0.0000446	398.704546	I	I
YER087W	0.17162	2.02396	0.08479	0.08479	7	1	11	YER087W	-0.283397655	9.71660235	YER087W	AIM10	2.30219688	0.00000162	1751.85714	I	I
YER088C	0.29008	1.75954	0.16486	0.16486	21	7	17	YER088C	0.058832435	10.0588324	YER088C	YER088C	2.3875566	0.00000049	1368.28571	I	I
YER090W	0.06476	1.93565	0.03346	0.03346	23	1	11	YER090W	0.940509955	10.94051	YER090W	YER090W	2.3877243	0.0000004	897.538462	I	I
YER091C	0.03873	0.84146	0.04603	0.04603	18	0	10	YER091C	4.76304605	14.7630461	YER091C	YER091C	2.31292973	0.0000157	676.545455	I	I
YER092W	0.29127	2.65053	0.10989	0.10989	41	27	37	YER092W	-0.770640496	9.2293595	YER092W	YER092W	2.36944491	0.00000192	489.25	I	I
YER095W	0.07065	1.52531	0.04632	0.04632	74	11	21	YER095W	0.169042125	10.1690421	YER095W	YER095W	2.27368774	0.0000412	454.020833	I	I
YER101C	0.17818	2.30599	0.07727	0.07727	8	3	13	YER101C	-0.26889638	9.73110362	YER101C	YER101C	2.29465034	0.0000443	1356.33333	I	I
YER103W	0.04588	2.14209	0.02142	0.02142	1787	774	4.60566964	YER103W	0.528673745	10.5286738	YER103W	SSA4	2.29951367	0.0000683	395.395349	I	I
YER104W	0.42113	1.66218	0.25336	0.25336	2	19	29	YER104W	-0.405208366	9.59479163	YER104W	RTT105	2.50528258	0.00000018	1210.33333	I	I
YER105C	0.37154	2.00714	0.18511	0.18511	46	6	16	YER105C	-0.451612446	9.54838755	YER105C	YER105C	2.34244508	0.0000239	756.285714	I	I
YER107C	0.05414	1.78634	0.03031	0.03031	26	3	13	YER107C	-0.724236416	9.27576358	YER107C	YER107C	2.36910951	0.0000518	427.708333	I	I
YER113C	0.19958	1.68997	0.1181	0.1181	6	3	13	YER113C	-0.553121371	9.44687863	YER113C	YER113C	2.47291632	0.00000713	1081.75	I	I
YER114C	0.24776	2.00353	0.12366	0.12366	49	9	19	YER114C	-0.379106071	9.62089393	YER114C	YER114C	2.30471239	0.0000386	635.347826	I	I
YER116C	0.52856	2.2844	0.23138	0.23138	35	13	23	YER116C	-0.590824686	9.40917531	YER116C	YER116C	2.27117223	0.0000825	1329.58333	I	I
YER120W	0.1644	0.8858	0.1856	0.1856	27	4	14	YER120W	0.215446205	10.2154462	YER120W	SCS2	2.33523394	0.000384	278.711539	I	I
YER122C	0.12066	2.01534	0.05987	0.05987	70	8	18	YER122C	0.093635495	10.0936355	YER122C	GLO3	2.34244508	0.000011	1026.54546	I	I
YER127W	0.1617	1.74109	0.09287	0.09287	30	5	15	YER127W	0.058832435	10.0588324	YER127W	YER127W	2.35804125	0.0000457	450.727273	I	I
YER129W	0.27309	2.16911	0.1259	0.1259	33	15	25	YER129W	-0.640129021	9.35987098	YER129W	SAK1	2.37799765	0.00000116	1146.44444	I	I
YER140W	0.204	1.67702	0.12164	0.12164	2	1	11	YER140W	-0.756139221	9.24386078	YER140W	YER140W	2.35015932	0.0000192	1025.3	I	I
YER141W	0.09872	1.59684	0.06182	0.06182	6	0	10	YER141W	0.40976329	10.4097633	YER141W	COX15	2.50779809	0.00000112	603.181818	I	I
YER142C	0.24472	2.05471	0.1191	0.1191	15	2	12	YER142C	-0.550221116	9.44977888	YER142C	YER142C	2.41019621	0	2892.66667	I	I
YER143W	0.1831	1.89972	0.09638	0.09638	24	6	16	YER143W	-0.393607346	9.60639265	YER143W	DDI1	2.43971155	0.00000579	953.6	I	I
YER144C	0.33554	1.98244	0.16926	0.16926	30	6	16	YER144C	-0.614026726	9.38597327	YER144C	UBP5	2.39610934	0.00000675	1174	I	I
YER148W	0.00968	1.26739	0.00764	0.00764	131	12	-0.378784728	YER148W	0.053031925	10.0530319	YER148W	BTF1	2.36441389	0.0000851	219.982456	I	I
YER149C	0.27567	2.17501	0.12674	0.12674	25	10	20	YER149C	-0.486415506	9.51358449	YER149C	PEA2	2.39275532	0.00000242	1354.66667	I	I
YER154W	0.09579	1.71288	0.05592	0.05592	16	0	10	YER154W	-0.271796635	9.72820337	YER154W	PET1402	2.43048801	0.00000415	639.363636	I	I
YER156C	0.09678	1.89057	0.05119	0.05119	4	0	10	YER156C	0.17194238	10.1719424	YER156C	YER156C	2.37732685	0.00000146	1172.85714	I	I
YER158C	0.34639	1.86424	0.18581	0.18581	16	1	11	YER158C	-0.416809386	9.58319061	YER158C	YER158C	2.43250042	0.00000045	948	I	I
YER164W	0.1004	1.93846	0.05179	0.05179	80	4	14	YER164W	0.19514442	10.1951444	YER164W	CHD1	2.2644642	0.0000295	408.563636	I	I
YER168C	0.16058	1.8495	0.08682	0.08682	6	0	10	YER168C	-0.21089128	9.78910872	YER168C	TNT1	2.31829616	0.0000212	1353.77778	I	I
YER171W	0.01897	1.6253	0.01167	0.01167	49	0	10	YER171W	-0.07747955	9.92252045	YER171W	YER171W	2.3055509	0.000163	450.575758	I	I
YER172C	0.23925	2.09361	0.11427	0.11427	90	5	15	YER172C	-0.379106071	9.62089393	YER172C	RSS1	2.25071273	0.000607	220.712766	I	I
YER173W	0.30602	2.1096	0.14506	0.14506	27	8	18	YER173W	-0.701034376	9.29896562	YER173W	YER173W	2.36491699	0.0000213	960.272727	I	I
YER176W	0.24493	1.9422	0.12611	0.12611	2	1	11	YER176W	-0.297898931	9.70210107	YER176W	MTT1	2.50377327	0.00000026	1324	I	I
YER177W	0.01559	1.1032	0.01413	0.01413	195	22	-0.313371941	YER177W	1.52636147	11.5263615	YER177W	BMH1	2.3667617	0.000077	184.811321	I	I
YER178W	0.03341	1.19239	0.02802	0.02802	26	5	15	YER178W	1.81928722	11.8192872	YER178W	PDA1	2.42981721	0.00000287	382.666667	I	I
YFL005W	0.01097	1.29925	0.00844	0.00844	160	12	-0.378784728	YFL005W	0.859302815	10.8593028	YFL005W	SRO6	2.61512661	0.00000024	1084	I	I
YFL008W	0.11393	1.95525	0.05827	0.05827	65	10	20	YFL008W	-0.048477	9.951523	YFL008W	CHL10	2.27318464	0.000238	569.057143	I	I
YFL014W	0.08767	1.38826	0.06315	0.06315	12	3	13	YFL014W	4.11338893	14.1133889	YFL014W	YFL014W	2.33540164	0.000311	117.980392	I	I
YFL016C	0.09892	1.83722	0.05384	0.05384	24	0	10	YFL016C	-0.271796635	9.72820337	YFL016C	MDJ1	2.2654704	0.000341	224.25	I	I
YFL017C	0.18125	2.17714	0.08325	0.08325	14	0	10	YFL017C	-0.29209842	9.70790158	YFL017C	GNA1	2.48599698	0.00000622	1891.5	I	I
YFL017W-A	0.09131	1.0439	0.08747	0.08747	62	33	43	YFL017W-A	-0.486415506	9.51358449	YFL017W-A	SMX2	2.3669294	0.000161	181.777778	I	I
YFL023W	0.4737	2.38985	0.19821	0.19821	148	18	-0.339537056	YFL023W	-0.579223666	9.42077633	YFL023W	YFL023W	2.2852591	0.0000836	597.857143	I	I
YFL025C	0.28558	1.793	0.15928	0.15928	11	0	10	YFL025C	-0.376205816	9.62379419	YFL025C	BST1	2.30856951	0.0000418	879	I	I
YFL026W	0.13641	1.83263	0.07443	0.07443	16	0	10	YFL026W	-0.2804974	9.7195026	YFL026W	STE2	2.38671809	0.000189	479.333333	I	I
YFL027C	0.28622	1.88986	0.15145	0.15145	6	1	11	YFL027C	-0.463213466	9.53678653	YFL027C	GYP8	2.41891665	0.00000494	2112	I	I
YFL028C	0.08371	1.70212	0.04918	0.04918	11	6	16	YFL028C	0.250249265	10.2502493	YFL028C	CAF16	2.39996646	0.00000647	1023.875	I	I
YFL029C	0.31263	1.91378	0.16336	0.16336	17	5	15	YFL029C	-0.442911681	9.55708832	YFL029C	YFL029C	2.46100956	0.00000025	1126.8	I	I
YFL036W	0.12298	2.07348	0.05931	0.05931	17	0	10	YFL036W	0.093635495	10.0936355	YFL036W	YFL036W	2.34227738	0.00000076	1347.8	I	I
YFL042C	0.23152	1.69577	0.13653	0.13653	22	13	23	YFL042C	-0.248594595	9.75140541	YFL042C	LTC2	2.46469898	0.0000323	789.333333	I	I
YFL044C	0.17786	1.64988	0.1078	0.1078	73	5	15	YFL044C	0.314054875	10.3140549	YFL044C	YFL044C	2.35552574	0.0000265	907.5	I	I
YFL046W	0.07574	2.27152	0.03334	0.03334	47	16	26	YFL046W	-0.353003776	9.64699623	YFL046W	FMP32	2.43501593	0.0000133	1161.75	I	I
YFR006W	0.17314	1.71076	0.1012	0.1012	8	1	11	YFR006W	0.75779389	10.7577939	YFR006W	YFR006W	2.41874895	0	1111	I	I
YFR007W	0.30572	1.65622	0.18459	0.18459	1	0	10	YFR007W	-0.294998676	9.70500133	YFR007W	AIM12	2.33439544	0.0000181	2040.2	I	I
YFR010W	0.08587	1.6023	0.05359	0.05359	66	4	14	YFR010W	0.540274765	10.5402748	YFR010W	UBP6	2.3263458	0.0000202	486.65625	I	I
YFR011C	0.13971	1.56229	0.08942	0.08942	9	10	20	YFR011C	0.28215207	10.2821521	YFR011C	MIC19	2.37481134	0.00000009	1773	I	I
YFR014C	0.16382	1.91277	0.08565	0.08565	359	131	0.399627436	YFR014C	-0.120983375	9.87901663	YFR014C	YFR014C	2.30957572	0.0000131	491.742857	I	I
YFR015C	0.04953	1.56371	0.03168	0.03168	65	4	14	YFR015C	0.49097043	10.4909704	YFR015C	YFR015C	2.30119068	0.0000426	879.555556	I	I
YFR022W	0.20076	1.77128	0.11334	0.11334	20	5	15	YFR022W	-0.605325961	9.39467404	YFR022W	YFR022W	2.66375985	0.00000058	991	I	I
YFR028C	0.09053	1.56318	0.05791	0.05791	196	19	-0.332995778	YFR028C	-0.593724941	9.40627506	YFR028C	CDC14	2.30924032	0.000328	139.714286	I	I
YFR029W	0.1874	1.7182	0.10907	0.10907	15	1	11	YFR029W	-0.669131571	9.33086843	YFR029W	PTR3	2.48197216	0	2033	I	I
YFR031C	0.1478	1.98219	0.07456	0.07456	38	15	25	YFR031C	0.00372759	10.0037276	YFR031C	YFR031C	2.26865672	0.0000526	860.6	I	I
YFR037C	0.10508	1.75118	0.06001	0.06001	82	13	23	YFR037C	-0.324001226	9.67599878	YFR037C	RSC8	2.27653866	0.000142	212.747368	I	I
YFR047C	0.09215	1.5887	0.058	0.058	3	0	10	YFR047C	0.279251815	10.2792518	YFR047C	YFR047C	2.51383532	0	1782	I	I
YFR048W	0.15245	1.98288	0.07688	0.07688	8	1	11	YFR048W	-0.527019076	9.47298092	YFR048W	RMD8	2.34110347	0.00000073	1357.7	I	I
YFR049W	0.26318	1.58193	0.16637	0.16637	12	3	13	YFR049W	-0.715535651	9.28446435	YFR049W	YFR049W	2.37196042	0.00000258	1010.25	I	I
YFR051C	0.10778	1.48928	0.07237	0.07237	48	10	20	YFR051C	0.430065075	10.4300651	YFR051C	RET2	2.31427134	0.000187	373.543478	I	I
YFR052W	0.09675	1.67925	0.05761	0.05761	68	6	16	YFR052W	0.319855385	10.3198554	YFR052W	RPN12	2.38470569	0.0000282	311.909091	I	I
YGL003C	0.06357	1.7107	0.03716	0.03716	84	8	18	YGL003C	-0.764839986	9.23516001	YGL003C	CDH1	2.41941976	0.0000026	1607	I	I
YGL005C	0.31275	2.04548	0.1529	0.1529	18	9	19	YGL005C	-0.384906581	9.61509342	YGL005C	COD5	2.30102298	0.000058	815.35	I	I
YGL016W	0.13259	1.53806	0.08621	0.08621	24	3	13	YGL016W	0.18934391	10.1893439	YGL016W	KAP122	2.41757505	0.00000641	586	I	I
YGL017W	0.23996	1.76895	0.13565	0.13565	10	0	10	YGL017W	-0.312400206	9.6875998	YGL017W	ATE1	2.44457488	0.0000101	1397.66667	I	I
YGL018C	0.1662	1.5779	0.10533	0.10533	13	11	21	YGL018C	-0.315300461	9.68469954	YGL018C	YGL018C	2.4496059	0.0000153	319.285714	I	I
YGL019W	0.03666	1.46772	0.02498	0.02498	109	9	-0.398408565	YGL019W	-0.434210916	9.56578908	YGL019W	YGL019W	2.28777461	0.000277	246.061539	I	I
YGL020C	0.25691	1.46062	0.17589	0.17589	7	5	15	YGL020C	0.053031925	10.0530319	YGL020C	MDM39	2.3870535	0.0000113	877.727273	I	I
YGL022W	0.04574	1.5285	0.02993	0.02993	24	1	11	YGL022W	0.899906385	10.8999064	YGL022W	STT3	2.37615294	0.0000213	1090.14286	I	I
YGL023C	0.22621	2.26976	0.09966	0.09966	22	4	14	YGL023C	-0.935955031	9.06404497	YGL023C	YGL023C	2.32802281	0.000102	552.181818	I	I
YGL025C	0.24473	1.71905	0.14236	0.14236	85	16	26	YGL025C	-0.848947381	9.15105262	YGL025C	PGD1	2.40600369	0.0000084	543.857143	I	I
YGL027C	0.15929	1.78099	0.08944	0.08944	16	0	10	YGL027C	-0.091980825	9.90801918	YGL027C	GLS1	2.36458159	0.000312	149.597015	I	I
YGL039W	0.23689	1.81084	0.13082	0.13082	28	5	15	YGL039W	0.78679644	10.7867964	YGL039W	YGL039W	2.31963777	0.00000984	1128.58333	I	I
YGL044C	0.07807	1.77336	0.04402	0.04402	33	16	26	YGL044C	-0.950456306	9.04954369	YGL044C	YGL044C	2.44776119	0.00000386	650.727273	I	I
YGL047W	0.31371	1.95279	0.16065	0.16065	3	0	10	YGL047W	-1.08966855	8.91033145	YGL047W	ALG13	2.52775449	0	2593.5	I	I
YGL055W	0.05964	1.04976	0.05681	0.05681	43	3	13	YGL055W	3.70155272	13.7015527	YGL055W	OLE1	2.29247023	0.000251	385.8	I	I
YGL056C	0.10152	1.52189	0.06671	0.06671	44	8	18	YGL056C	-0.437111171	9.56288883	YGL056C	SDS23	2.38571189	0.00000135	1195.625	I	I
YGL058W	0.01888	1.70411	0.01108	0.01108	128	17	-0.346078335	YGL058W	0.55477604	10.554776	YGL058W	RAD6	2.36994801	0.00000994	641.0625	I	I
YGL061C	0.26535	2.35404	0.11272	0.11272	29	20	30	YGL061C	-0.515418056	9.48458194	YGL061C	DUO1	2.33338923	0.0000177	1048.92308	I	I
YGL064C	0.23571	2.13157	0.11058	0.11058	13	2	12	YGL064C	-0.219592045	9.78040796	YGL064C	MRH4	2.36357538	0.0000319	1193.25	I	I
YGL067W	0.17363	1.75438	0.09897	0.09897	8	0	10	YGL067W	-0.057177765	9.94282224	YGL067W	YGL067W	2.62082844	0.00000062	1163.66667	I	I
YGL070C	0.00363	1.04363	0.00348	0.00348	30	1	11	YGL070C	-0.17028771	9.82971229	YGL070C	YGL070C	2.32986752	0.0000493	534.769231	I	I
YGL071W	0.26189	2.0029	0.13076	0.13076	29	8	18	YGL071W	-0.631428256	9.36857174	YGL071W	YGL071W	2.3263458	0.000171	256.734375	I	I
YGL078C	0.07599	1.5346	0.04952	0.04952	200	74	0.026774551	YGL078C	1.6336709	11.6336709	YGL078C	YGL078C	2.35384873	0.0000397	954.9	I	I
YGL080W	0.0726	1.31118	0.05537	0.05537	6	0	10	YGL080W	0.024029375	10.0240294	YGL080W	FMP37	2.3880597	0.0000172	1059.375	I	I
YGL082W	0.15564	2.0782	0.07489	0.07489	11	2	12	YGL082W	-0.318200716	9.68179929	YGL082W	YGL082W	2.3674325	0.0000179	1358	I	I
YGL084C	0.1178	1.81767	0.06481	0.06481	14	0	10	YGL084C	0.302453855	10.3024539	YGL084C	YGL084C	2.41573034	0.0000359	429.4	I	I
YGL085W	0.18508	1.8004	0.1028	0.1028	5	0	10	YGL085W	-0.657530551	9.34246945	YGL085W	YGL085W	2.32500419	0.0000109	1382.1	I	I
YGL094C	0.09999	1.92728	0.05188	0.05188	6	0	10	YGL094C	-0.306599696	9.69340031	YGL094C	PAN2	2.35854436	0.00000249	989.181818	I	I
YGL099W	0.06293	1.7262	0.03646	0.03646	55	1	11	YGL099W	0.46776839	10.4677684	YGL099W	LSG1	2.32819051	0.0000414	327.285714	I	I
YGL101W	0.13885	2.02491	0.06857	0.06857	4	0	10	YGL101W	0.151640595	10.1516406	YGL101W	YGL101W	2.40600369	0.00000011	1561.2	I	I
YGL113W	0.35165	1.88026	0.18702	0.18702	17	0	10	YGL113W	-0.614026726	9.38597327	YGL113W	YGL113W	2.510649	0	1816	I	I
YGL114W	0.06784	1.7906	0.03789	0.03789	1	0	10	YGL114W	-0.663331061	9.33666894	YGL114W	YGL114W	2.47559953	0	1974.33333	I	I
YGL115W	0.0382	1.30771	0.02921	0.02921	49	6	16	YGL115W	0.198044675	10.1980447	YGL115W	CAT3	2.32198558	0.000245	492.962963	I	I
YGL119W	0.17902	2.14819	0.08333	0.08333	5	0	10	YGL119W	-0.564722391	9.43527761	YGL119W	ABC1	2.35418414	0.000083	1642.57143	I	I
YGL121C	0.23276	1.75023	0.13299	0.13299	18	10	20	YGL121C	-0.422609896	9.5773901	YGL121C	GPG1	2.40399128	0.00000004	1734.8	I	I
YGL123W	0.02169	0.30911	0.07018	0.07018	59	1	11	YGL123W	6.25377712	16.2537771	YGL123W	SUP38	2.44641959	0.00000853	447.090909	I	I
YGL124C	0.20546	1.93874	0.10598	0.10598	11	1	11	YGL124C	-0.735837436	9.26416256	YGL124C	MON1	2.38219017	0.00000665	1236	I	I
YGL131C	0.40704	2.15247	0.1891	0.1891	15	3	13	YGL131C	-0.379106071	9.62089393	YGL131C	YGL131C	2.30739561	0.00000552	1145.84615	I	I
YGL133W	0.26153	2.01427	0.12984	0.12984	47	8	18	YGL133W	-0.190589495	9.80941051	YGL133W	ITC1	2.27804796	0.0000413	408.425532	I	I
YGL136C	0.1514	1.83075	0.0827	0.0827	5	1	11	YGL136C	-0.593724941	9.40627506	YGL136C	YGL136C	2.59399631	0	1792	I	I
YGL138C	0.49208	2.61096	0.18847	0.18847	0	0	10	YGL138C	-0.518318311	9.48168169	YGL138C	YGL138C	2.41505953	0.00000816	1807.66667	I	I
YGL142C	0.26715	1.77119	0.15083	0.15083	1	0	10	YGL142C	-0.712635396	9.2873646	YGL142C	GPI10	2.47375482	0	1429.33333	I	I
YGL144C	0.13766	2.03513	0.06764	0.06764	4	0	10	YGL144C	-0.451612446	9.54838755	YGL144C	ROG1	2.40482978	0.00000355	1188	I	I
YGL147C	0.08549	0.53413	0.16005	0.16005	81	6	16	YGL147C	5.76073377	15.7607338	YGL147C	YGL147C	2.35669965	0.00000976	489.8	I	I
YGL156W	0.08809	1.86912	0.04713	0.04713	9	0	10	YGL156W	0.058832435	10.0588324	YGL156W	AMS1	2.52406507	0.0000151	564.9	I	I
YGL157W	0.23864	2.12815	0.11214	0.11214	27	3	13	YGL157W	0.952110975	10.952111	YGL157W	ARI1	2.37061882	0.0000035	857.916667	I	I
YGL158W	0.50657	2.06192	0.24568	0.24568	222	67	-0.0190144	YGL158W	-0.196390005	9.80361	YGL158W	RCK1	2.39778635	0.00000013	1698.6	I	I
YGL160W	0.3056	1.78533	0.17118	0.17118	2	3	13	YGL160W	-0.674932081	9.32506792	YGL160W	YGL160W	2.40415898	0.00000002	1867	I	I
YGL162W	0.32918	1.86141	0.17685	0.17685	6	2	12	YGL162W	-0.355904031	9.64409597	YGL162W	YGL162W	2.39040751	0.000161	932.818182	I	I
YGL164C	0.19451	2.28383	0.08517	0.08517	11	4	14	YGL164C	-0.631428256	9.36857174	YGL164C	YGL164C	2.3664263	0.00000311	1912.66667	I	I
YGL171W	0.11881	1.96569	0.06044	0.06044	85	33	43	YGL171W	0.05593218	10.0559322	YGL171W	YGL171W	2.35686735	0.000178	288.323529	I	I
YGL174W	0.51304	2.21038	0.2321	0.2321	11	4	14	YGL174W	-0.689433356	9.31056664	YGL174W	BUD13	2.40080496	0.000025	631.25	I	I
YGL175C	0.35096	1.9232	0.18249	0.18249	12	0	10	YGL175C	-0.727136671	9.27286333	YGL175C	YGL175C	2.41069931	0.00000428	1191.66667	I	I
YGL180W	0.11572	1.87227	0.06181	0.06181	234	56	-0.090968466	YGL180W	-0.309499951	9.69050005	YGL180W	ATG1	2.39661244	0.0000161	483	I	I
YGL184C	0.09174	1.97676	0.04641	0.04641	10	0	10	YGL184C	-0.00207292	9.99792708	YGL184C	STR3	2.60321986	0.0000162	650.5	I	I
YGL185C	0.33672	1.92779	0.17467	0.17467	2	2	12	YGL185C	-0.321100971	9.67889903	YGL185C	YGL185C	2.31343284	0.00000009	1998.71429	I	I
YGL190C	0.03538	1.50073	0.02358	0.02358	68	4	14	YGL190C	-0.361704541	9.63829546	YGL190C	YGL190C	2.33037062	0.0000548	290.571429	I	I
YGL194C	0.06238	1.88728	0.03305	0.03305	56	5	15	YGL194C	-0.564722391	9.43527761	YGL194C	HOS2	2.37145732	0.000104	284.675676	I	I
YGL197W	0.15122	2.094	0.07222	0.07222	43	0	10	YGL197W	-0.643029276	9.35697072	YGL197W	MDS3	2.24618481	0.0000917	647.69697	I	I
YGL206C	0.04773	1.62436	0.02938	0.02938	50	6	16	YGL206C	1.26823877	11.2682388	YGL206C	YGL206C	2.31829616	0.0000507	406.97561	I	I
YGL219C	0.14159	1.82157	0.07773	0.07773	19	0	10	YGL219C	-0.692333611	9.30766639	YGL219C	MMM2	2.3674325	0.00000252	1947.4	I	I
YGL228W	0.30347	1.86733	0.16251	0.16251	6	13	23	YGL228W	0.145840085	10.1458401	YGL228W	YGL228W	2.38001006	0.0000708	1167.5	I	I
YGL229C	0.3222	1.79141	0.17986	0.17986	48	7	17	YGL229C	-0.15868669	9.84131331	YGL229C	YGL229C	2.31175583	0.000107	1219.55556	I	I
YGL231C	0.18086	1.74841	0.10344	0.10344	4	0	10	YGL231C	-0.09488108	9.90511892	YGL231C	YGL231C	2.46738219	0	2760.5	I	I
YGL233W	0.13187	1.82982	0.07207	0.07207	40	2	12	YGL233W	-0.00787343	9.99212657	YGL233W	SEC15	2.41137012	0.0000454	387.192308	I	I
YGL237C	0.29231	1.45284	0.2012	0.2012	57	24	34	YGL237C	-0.976558601	9.0234414	YGL237C	YGL237C	2.35971826	0.000289	143.370787	I	I
YGL238W	0.06792	1.6542	0.04106	0.04106	22	1	11	YGL238W	0.198044675	10.1980447	YGL238W	CSE1	2.31192353	0.000146	463.709677	I	I
YGL252C	0.04176	1.85339	0.02253	0.02253	31	4	14	YGL252C	-0.2804974	9.7195026	YGL252C	RTG2	2.28022807	0.0000333	537.9	I	I
YGL253W	0.05133	0.89124	0.05759	0.05759	36	7	17	YGL253W	4.57452947	14.5745295	YGL253W	HXK2	2.34412209	0.0000173	1194.09091	I	I
YGR003W	0.32964	1.82276	0.18085	0.18085	13	9	19	YGR003W	-0.463213466	9.53678653	YGR003W	YGR003W	2.39795405	0.0000144	1537.5	I	I
YGR004W	0.15592	1.55239	0.10044	0.10044	19	0	10	YGR004W	-0.503817036	9.49618296	YGR004W	PEX31	2.46738219	0	2760.5	I	I
YGR007W	0.19704	1.82517	0.10796	0.10796	1	0	10	YGR007W	-0.350103521	9.64989648	YGR007W	YGR007W	2.36424618	0.00000007	1964	I	I
YGR013W	0.38385	1.48493	0.2585	0.2585	49	7	17	YGR013W	-0.454512701	9.5454873	YGR013W	SNU71	2.40583599	0.0000185	296.607143	I	I
YGR016W	0.20817	1.52732	0.1363	0.1363	13	1	11	YGR016W	-0.396507601	9.6034924	YGR016W	YGR016W	2.3476438	0.0000455	567.814815	I	I
YGR020C	0.03806	0.92472	0.04116	0.04116	30	1	11	YGR020C	1.3436454	11.3436454	YGR020C	VMA7	2.41774275	0.0000351	521.142857	I	I
YGR031W	0.32426	1.72132	0.18838	0.18838	3	0	10	YGR031W	-0.901151971	9.09884803	YGR031W	YGR031W	2.40197887	0.00000021	1536	I	I
YGR041W	0.57711	1.88637	0.30594	0.30594	9	2	12	YGR041W	-0.695233866	9.30476613	YGR041W	YGR041W	2.38269328	0.00000119	1334.85714	I	I
YGR043C	0.09913	1.73209	0.05723	0.05723	26	8	18	YGR043C	0.140039575	10.1400396	YGR043C	NQM1	2.41187322	0	2756.33333	I	I
YGR044C	0.6546	1.74149	0.37589	0.37589	0	0	10	YGR044C	-0.889550951	9.11044905	YGR044C	RME1	2.48197216	0	2033	I	I
YGR047C	0.09949	2.0478	0.04858	0.04858	23	4	14	YGR047C	-0.367505051	9.63249495	YGR047C	TFC4	2.34311588	0.0000458	489.48	I	I
YGR053C	0.38967	2.14129	0.18198	0.18198	3	3	13	YGR053C	-0.399407856	9.60059214	YGR053C	YGR053C	2.59919504	0	1782.5	I	I
YGR054W	0.11	1.60215	0.06866	0.06866	44	2	12	YGR054W	0.43876584	10.4387658	YGR054W	YGR054W	2.3260104	0.00000362	1041.08333	I	I
YGR056W	0.18625	2.04014	0.09129	0.09129	58	6	16	YGR056W	-0.480614996	9.519385	YGR056W	YGR056W	2.36877411	0.00000884	347.848485	I	I
YGR070W	0.30374	2.17247	0.13981	0.13981	38	7	17	YGR070W	-0.529919331	9.47008067	YGR070W	SKC1	2.34881771	0	2094.83333	I	I
YGR072W	0.28001	2.4536	0.11412	0.11412	19	17	27	YGR072W	-0.09488108	9.90511892	YGR072W	SUA6	2.47811504	0.00000133	1313.4	I	I
YGR074W	0.07211	1.93319	0.0373	0.0373	51	12	22	YGR074W	-0.19348975	9.80651025	YGR074W	SMD1	2.36273688	0.000249	296.027027	I	I
YGR075C	0.24866	1.31378	0.18927	0.18927	14	2	12	YGR075C	-0.03107547	9.96892453	YGR075C	YGR075C	2.368271	0.0000682	679.1875	I	I
YGR080W	0.25979	1.62893	0.15948	0.15948	9	8	18	YGR080W	-0.07747955	9.92252045	YGR080W	TWF1	2.46151266	0.00000003	1488.75	I	I
YGR081C	0.33782	2.07514	0.16279	0.16279	27	12	22	YGR081C	-0.14708567	9.85291433	YGR081C	YGR081C	2.28408519	0.000374	284.583333	I	I
YGR084C	0.2297	1.87754	0.12234	0.12234	34	1	11	YGR084C	-0.489315761	9.51068424	YGR084C	YGR084C	2.46436358	0.0000104	360.785714	I	I
YGR094W	0.07457	1.47206	0.05066	0.05066	35	0	10	YGR094W	2.32683185	12.3268319	YGR094W	VAS1	2.34227738	0.000124	501.44	I	I
YGR098C	0.26523	1.87992	0.14109	0.14109	7	0	10	YGR098C	-0.428410406	9.57158959	YGR098C	YGR098C	2.35619655	0.00000186	933.7	I	I
YGR100W	0.08449	1.84134	0.04589	0.04589	24	4	14	YGR100W	-0.178988475	9.82101153	YGR100W	MDR1	2.4499413	0.00000684	1681.25	I	I
YGR102C	0.40791	1.68232	0.24247	0.24247	3	0	10	YGR102C	-1.14477339	8.85522661	YGR102C	GTF1	2.54167365	0.0000045	795.2	I	I
YGR106C	0.32242	1.48985	0.21641	0.21641	20	2	12	YGR106C	0.795497205	10.7954972	YGR106C	VOA1	2.30169378	0.0000423	625.692308	I	I
YGR111W	0.2857	2.05262	0.13919	0.13919	8	2	12	YGR111W	-0.15868669	9.84131331	YGR111W	YGR111W	2.35133322	0.00000284	1086.18182	I	I
YGR112W	0.28874	1.90388	0.15166	0.15166	14	0	10	YGR112W	-0.521218566	9.47878143	YGR112W	YGR112W	2.54687238	0.00000913	1033	I	I
YGR126W	0.15461	1.71932	0.08993	0.08993	23	12	22	YGR126W	0.15454085	10.1545409	YGR126W	YGR126W	2.38386718	0	2171.4	I	I
YGR128C	0.23935	1.85961	0.12871	0.12871	64	9	19	YGR128C	0.07913422	10.0791342	YGR128C	UTP8	2.30353849	0.000174	431.585366	I	I
YGR136W	0.27145	2.07683	0.1307	0.1307	84	25	35	YGR136W	-0.819944831	9.18005517	YGR136W	LSB1	2.40633909	0.00000295	1099.16667	I	I
YGR145W	0.09531	1.91856	0.04968	0.04968	52	7	17	YGR145W	0.64178369	10.6417837	YGR145W	YGR145W	2.43635754	0.0000173	303.631579	I	I
YGR152C	0.14695	2.01531	0.07292	0.07292	41	12	22	YGR152C	-0.178988475	9.82101153	YGR152C	YGR152C	2.38219017	0.0000102	478.84	I	I
YGR156W	0.17195	1.51034	0.11385	0.11385	33	16	26	YGR156W	-0.460313211	9.53968679	YGR156W	YGR156W	2.46000335	0.0000114	355.578947	I	I
YGR159C	0.08145	1.00783	0.08082	0.08082	438	186	0.759397765	YGR159C	3.47243257	13.4724326	YGR159C	NSR1	2.30219688	0.000102	307.510638	I	I
YGR163W	0.02632	1.81097	0.01453	0.01453	31	5	15	YGR163W	-0.544420606	9.45557939	YGR163W	YGR163W	2.33523394	0.0000999	315.6	I	I
YGR165W	0.12727	1.65811	0.07676	0.07676	34	2	12	YGR165W	-0.309499951	9.69050005	YGR165W	YGR165W	2.34915311	0.0000355	707.5	I	I
YGR166W	0.30051	1.83563	0.16371	0.16371	17	0	10	YGR166W	-0.529919331	9.47008067	YGR166W	TRS65	2.35502264	0.00000854	747.428571	I	I
YGR169C	0.29613	1.74325	0.16987	0.16987	1	3	13	YGR169C	-0.692333611	9.30766639	YGR169C	PUS6	2.71004528	0	1372.5	I	I
YGR171C	0.24883	2.00945	0.12383	0.12383	2	0	10	YGR171C	-0.196390005	9.80361	YGR171C	YGR171C	2.38956901	0.00000444	1005.375	I	I
YGR173W	0.02543	1.8223	0.01395	0.01395	41	2	12	YGR173W	0.685287515	10.6852875	YGR173W	GIR1	2.37850075	0.0000127	430.375	I	I
YGR178C	0.1649	1.73561	0.09501	0.09501	56	4	14	YGR178C	0.21834646	10.2183465	YGR178C	MRS16	2.33120912	0.0000361	509.793104	I	I
YGR180C	0.08616	1.17875	0.07309	0.07309	70	8	18	YGR180C	3.66964991	13.6696499	YGR180C	CRT3	2.30085527	0.0000339	570.75	I	I
YGR187C	0.1405	2.48772	0.05648	0.05648	9	5	15	YGR187C	0.2995536	10.2995536	YGR187C	HGH1	2.45547543	0.0000109	377.608696	I	I
YGR191W	0.10241	1.72649	0.05932	0.05932	125	20	-0.326454499	YGR191W	0.55477604	10.554776	YGR191W	HIP1	2.38286098	0.0000048	1316.66667	I	I
YGR194C	0.19101	1.89483	0.10081	0.10081	0	0	10	YGR194C	-0.26309587	9.73690413	YGR194C	YGR194C	2.37816535	0.0000321	877.625	I	I
YGR195W	0.02718	1.60551	0.01693	0.01693	15	1	11	YGR195W	-0.12968414	9.87031586	YGR195W	SKI6	2.32550729	0.000132	373.222222	I	I
YGR196C	0.4514	2.57286	0.17545	0.17545	16	17	27	YGR196C	-0.529919331	9.47008067	YGR196C	YGR196C	2.3674325	0.00000303	1119.55556	I	I
YGR199W	0.18841	1.75677	0.10725	0.10725	27	3	13	YGR199W	-0.353003776	9.64699623	YGR199W	YGR199W	2.90508133	0	1321	I	I
YGR201C	0.26996	2.22477	0.12134	0.12134	26	3	13	YGR201C	-0.173187965	9.82681204	YGR201C	YGR201C	2.44273017	0.0000127	1549.66667	I	I
YGR204W	0.05854	1.73235	0.03379	0.03379	66	4	14	YGR204W	1.11742551	11.1174255	YGR204W	YGR204W	2.33892336	0.000053	348.342105	I	I
YGR205W	0.17097	2.1306	0.08024	0.08024	4	0	10	YGR205W	-0.04267649	9.95732351	YGR205W	YGR205W	2.34529599	0.0000189	1255	I	I
YGR206W	0.23513	1.4545	0.16165	0.16165	2	1	11	YGR206W	-0.471914231	9.52808577	YGR206W	YGR206W	2.38403488	0.000259	1532.14286	I	I
YGR207C	0.088	1.75141	0.05025	0.05025	7	0	10	YGR207C	0.470668645	10.4706687	YGR207C	YGR207C	2.41019621	0	2892.66667	I	I
YGR208W	0.21004	1.84598	0.11378	0.11378	5	1	11	YGR208W	0.517072725	10.5170727	YGR208W	SER2	2.35552574	0.00000216	681	I	I
YGR213C	0.36155	2.12419	0.1702	0.1702	4	2	12	YGR213C	-0.289198165	9.71080184	YGR213C	RTA1	2.51601543	0	3491	I	I
YGR220C	0.1142	1.95896	0.05829	0.05829	44	1	11	YGR220C	-0.167387455	9.83261255	YGR220C	YGR220C	2.33003522	0.000597	253.461539	I	I
YGR221C	0.64111	2.01424	0.31829	0.31829	6	2	12	YGR221C	-0.759039476	9.24096052	YGR221C	YGR221C	2.407513	0.0000273	2081.25	I	I
YGR230W	0.76472	2.57674	0.29678	0.29678	1	2	12	YGR230W	-0.840246616	9.15975338	YGR230W	YGR230W	2.4293141	0	2653.33333	I	I
YGR231C	0.06819	1.56766	0.0435	0.0435	37	0	10	YGR231C	-0.12968414	9.87031586	YGR231C	YGR231C	2.39124602	0.0000429	278.785714	I	I
YGR232W	0.12479	1.63269	0.07643	0.07643	39	1	11	YGR232W	0.0675332	10.0675332	YGR232W	NAS6	2.33120912	0.000104	380.090909	I	I
YGR235C	0.29512	1.95187	0.1512	0.1512	17	2	12	YGR235C	0.06173269	10.0617327	YGR235C	MIC26	2.51601543	0	3491	I	I
YGR237C	0.18425	2.05265	0.08976	0.08976	22	1	11	YGR237C	-0.419709641	9.58029036	YGR237C	YGR237C	2.31829616	0.00000274	1195	I	I
YGR240C	0.02344	1.28806	0.0182	0.0182	99	4	14	YGR240C	3.02289305	13.0228931	YGR240C	YGR240C	2.29934597	0.000347	259.240741	I	I
YGR243W	0.09546	1.89098	0.05048	0.05048	13	1	11	YGR243W	-1.14767365	8.85232635	YGR243W	FMP43	2.52658058	0.00000067	1731.66667	I	I
YGR246C	0.10713	2.30791	0.04642	0.04642	15	7	17	YGR246C	0.0095281	10.0095281	YGR246C	BRF1	2.47258092	0.00000114	533.214286	I	I
YGR255C	0.08334	2.14723	0.03881	0.03881	5	0	10	YGR255C	-0.22829281	9.77170719	YGR255C	YGR255C	2.43182962	0.00000124	925	I	I
YGR261C	0.16702	1.7957	0.09301	0.09301	14	0	10	YGR261C	-0.03107547	9.96892453	YGR261C	APL6	2.31427134	0.0000189	639.380952	I	I
YGR262C	0.12885	1.59005	0.08104	0.08104	48	4	14	YGR262C	-0.271796635	9.72820337	YGR262C	LDB14	2.35502264	0.0000488	826.571429	I	I
YGR263C	0.26106	2.10358	0.1241	0.1241	3	0	10	YGR263C	-0.14708567	9.85291433	YGR263C	SAY1	2.32265638	0.0000366	708.444444	I	I
YGR264C	0.09999	1.76029	0.0568	0.0568	26	1	11	YGR264C	1.53506223	11.5350622	YGR264C	MES1	2.26228409	0.000379	679.777778	I	I
YGR266W	0.1874	2.0535	0.09126	0.09126	11	1	11	YGR266W	0.22994748	10.2299475	YGR266W	YGR266W	2.54234446	0.00000102	938.666667	I	I
YGR267C	0.01535	1.52523	0.01007	0.01007	36	2	12	YGR267C	0.279251815	10.2792518	YGR267C	YGR267C	2.33456314	0.000347	837	I	I
YGR268C	0.25818	1.57995	0.16341	0.16341	12	4	14	YGR268C	-0.909852736	9.09014726	YGR268C	YGR268C	2.4898541	0.00000472	487.125	I	I
YGR284C	0.05185	1.18749	0.04366	0.04366	93	3	13	YGR284C	0.68818777	10.6881878	YGR284C	ERV29	2.34177427	0.0000781	695.736842	I	I
YGR285C	0.07594	1.07058	0.07093	0.07093	58	7	17	YGR285C	3.29261676	13.2926168	YGR285C	YGR285C	2.27888647	0.000324	104.094891	I	I
YHL008C	0.24651	1.82615	0.13499	0.13499	11	4	14	YHL008C	-0.469013976	9.53098602	YHL008C	YHL008C	2.38504109	0	2677	I	I
YHL010C	0.19678	2.05379	0.09581	0.09581	51	5	15	YHL010C	-0.315300461	9.68469954	YHL010C	ETP1	2.44155626	0	3119.5	I	I
YHL011C	0.01022	1.40485	0.00727	0.00727	76	9	19	YHL011C	1.00431557	11.0043156	YHL011C	PRS3	2.25691766	0.00018	414.125	I	I
YHL013C	0.21104	2.35064	0.08978	0.08978	19	13	23	YHL013C	0.122638045	10.1226381	YHL013C	YHL013C	2.36961261	0.00000106	1275.5	I	I
YHL014C	0.13842	1.84377	0.07507	0.07507	48	7	17	YHL014C	-0.419709641	9.58029036	YHL014C	YHL014C	2.31896696	0.00000431	1237.45455	I	I
YHL019C	0.17629	1.6642	0.10593	0.10593	25	2	12	YHL019C	-0.474814486	9.52518551	YHL019C	YHL019C	2.35150092	0.0000392	331.114286	I	I
YHL020C	0.19045	1.75945	0.10824	0.10824	40	16	26	YHL020C	-0.988159621	9.01184038	YHL020C	OPI1	2.34227738	0.0000268	846.272727	I	I
YHL021C	0.11255	1.65598	0.06797	0.06797	15	1	11	YHL021C	-0.19929026	9.80070974	YHL021C	FMP12	2.69562301	0.00000087	843.666667	I	I
YHL023C	0.21012	1.92265	0.10929	0.10929	16	4	14	YHL023C	-0.495116271	9.50488373	YHL023C	YHL023C	2.42981721	0.000022	279.31579	I	I
YHL030W	0.21098	1.86356	0.11321	0.11321	177	12	-0.378784728	YHL030W	-0.14128516	9.85871484	YHL030W	YHL030W	2.24970652	0.000415	212.436893	I	I
YHL033C	0.07068	0.62336	0.11339	0.11339	171	7	-0.411491122	YHL033C	5.87964422	15.8796442	YHL033C	MAK7	2.28777461	0.000164	365.826087	I	I
YHL034C	0.09594	1.12548	0.08524	0.08524	99	16	26	YHL034C	1.91789589	11.9178959	YHL034C	YHL034C	2.27167533	0.000172	264.087912	I	I
YHL035C	0.37304	2.11337	0.17651	0.17651	28	1	11	YHL035C	-0.25729536	9.74270464	YHL035C	YHL035C	2.57403991	0.00000033	1047.5	I	I
YHR007C	0.05873	0.97196	0.06042	0.06042	92	12	22	YHR007C	3.62614609	13.6261461	YHR007C	ERG11	2.32332718	0.000306	306.5	I	I
YHR013C	0.07089	1.78418	0.03973	0.03973	28	2	12	YHR013C	0.406863035	10.406863	YHR013C	ARD1	2.33020292	0.0000193	433.352941	I	I
YHR017W	0.27777	1.78632	0.1555	0.1555	1	0	10	YHR017W	-0.727136671	9.27286333	YHR017W	YHR017W	2.47526413	0.00000072	885	I	I
YHR018C	0.05472	1.59076	0.0344	0.0344	4	0	10	YHR018C	1.10002398	11.100024	YHR018C	ARG4	2.48096596	0.00000019	1323.2	I	I
YHR024C	0.09295	1.7316	0.05368	0.05368	11	0	10	YHR024C	-0.23989383	9.76010617	YHR024C	MAS2	2.36592319	0.00000511	1298.9	I	I
YHR025W	0.04045	1.28981	0.03136	0.03136	16	2	12	YHR025W	1.10872475	11.1087248	YHR025W	THR1	2.34445749	0.0000443	837.055556	I	I
YHR027C	0.07806	1.62777	0.04796	0.04796	495	46	-0.156381253	YHR027C	0.557676295	10.5576763	YHR027C	YHR027C	2.23243334	0.00043	199.044776	I	I
YHR030C	0.08166	1.58514	0.05152	0.05152	448	137	0.438875109	YHR030C	-0.303699441	9.69630056	YHR030C	SLT2	2.34194198	0.0000615	686.266667	I	I
YHR034C	0.33763	2.79257	0.1209	0.1209	15	2	12	YHR034C	-0.924354011	9.07564599	YHR034C	YHR034C	2.2849237	0.000297	649.08	I	I
YHR036W	0.27683	1.41424	0.19575	0.19575	4	5	15	YHR036W	-0.477714741	9.52228526	YHR036W	YHR036W	2.31578065	0.0000823	986.133333	I	I
YHR037W	0.05614	1.96419	0.02858	0.02858	4	0	10	YHR037W	0.412663545	10.4126636	YHR037W	PUT2	2.33104142	0	2014.83333	I	I
YHR038W	0.19909	1.93508	0.10289	0.10289	5	6	16	YHR038W	-0.091980825	9.90801918	YHR038W	YHR038W	2.42629549	0.00000064	1674.33333	I	I
YHR062C	0.09543	1.66651	0.05726	0.05726	17	0	10	YHR062C	-0.677832336	9.32216766	YHR062C	RPP1	2.25742076	0.000221	807.55	I	I
YHR063C	0.18286	1.8533	0.09866	0.09866	22	2	12	YHR063C	0.71138981	10.7113898	YHR063C	YHR063C	2.35217173	0.0000166	652.3	I	I
YHR066W	0.09596	1.87626	0.05114	0.05114	100	11	-0.385326007	YHR066W	0.586678845	10.5866789	YHR066W	YHR066W	2.33271843	0.00024	267.272727	I	I
YHR067W	0.41715	1.85347	0.22506	0.22506	2	0	10	YHR067W	-0.628528001	9.371472	YHR067W	YHR067W	2.4890156	0.00000123	974.25	I	I
YHR068W	0.03072	1.34075	0.02291	0.02291	11	1	11	YHR068W	2.60235607	12.6023561	YHR068W	DYS1	2.46050646	0.0000646	1193.8	I	I
YHR073W	0.13513	1.99613	0.0677	0.0677	18	2	12	YHR073W	-0.483515251	9.51648475	YHR073W	OSH3	2.34831461	0.00000993	1071.72727	I	I
YHR074W	0.04499	1.6051	0.02803	0.02803	11	2	12	YHR074W	0.186443655	10.1864437	YHR074W	YHR074W	2.45363072	0.00000444	663.125	I	I
YHR085W	0.1638	1.92134	0.08525	0.08525	25	0	10	YHR085W	-0.382006326	9.61799367	YHR085W	YHR085W	2.33959416	0.000374	377.361111	I	I
YHR086W	0.25422	1.93015	0.13171	0.13171	57	18	28	YHR086W	-0.416809386	9.58319061	YHR086W	MRE2	2.3476438	0.0000336	300.585366	I	I
YHR087W	0.14267	1.90714	0.07481	0.07481	13	8	18	YHR087W	1.3697477	11.3697477	YHR087W	RTC3	2.3466376	0	2064.16667	I	I
YHR090C	0.13436	1.85166	0.07256	0.07256	43	8	18	YHR090C	-0.161586945	9.83841306	YHR090C	NBN1	2.31779306	0.0000164	550.821429	I	I
YHR104W	0.07907	2.03439	0.03887	0.03887	19	2	12	YHR104W	0.708489555	10.7084896	YHR104W	YHR104W	2.30437699	0.00000727	743.8	I	I
YHR107C	0.03747	1.8422	0.02034	0.02034	112	25	-0.293748105	YHR107C	0.453267115	10.4532671	YHR107C	CDC12	2.33104142	0.0000246	685.823529	I	I
YHR108W	0.159	1.58735	0.10017	0.10017	41	4	14	YHR108W	0.430065075	10.4300651	YHR108W	GGA2	2.31879926	0.00000341	762.142857	I	I
YHR109W	0.46981	2.10327	0.22337	0.22337	0	1	11	YHR109W	-0.408108621	9.59189138	YHR109W	YHR109W	2.57806473	0.00000432	666.5	I	I
YHR113W	0.1358	1.87966	0.07225	0.07225	23	2	12	YHR113W	0.261850285	10.2618503	YHR113W	APE4	2.33523394	0.000198	570.391304	I	I
YHR118C	0.2154	2.09137	0.10299	0.10299	37	7	17	YHR118C	-0.350103521	9.64989648	YHR118C	ORC6	2.34043267	0.0000919	594	I	I
YHR120W	0.17916	2.03232	0.08815	0.08815	20	1	11	YHR120W	-0.579223666	9.42077633	YHR120W	YHR120W	2.25171893	0.0000935	892.714286	I	I
YHR121W	0.09744	1.25212	0.07782	0.07782	85	7	17	YHR121W	0.13133881	10.1313388	YHR121W	LSM12	2.30286768	0.0000276	708	I	I
YHR127W	0.41788	2.50937	0.16653	0.16653	13	0	10	YHR127W	-0.590824686	9.40917531	YHR127W	YHR127W	2.3463022	0.00000115	1124.54546	I	I
YHR129C	0.13252	1.74132	0.0761	0.0761	146	40	-0.195628925	YHR129C	-0.587924431	9.41207557	YHR129C	YHR129C	2.33657555	0.000114	815.5625	I	I
YHR132C	0.15526	1.78307	0.08707	0.08707	1	1	11	YHR132C	-0.039776235	9.96022377	YHR132C	YHR132C	2.38319638	0.0000003	1882.5	I	I
YHR133C	0.27255	1.92725	0.14142	0.14142	53	0	10	YHR133C	-0.309499951	9.69050005	YHR133C	YHR133C	2.65453631	0.000001	976	I	I
YHR138C	0.30028	1.65233	0.18173	0.18173	4	16	26	YHR138C	0.000827335	10.0008273	YHR138C	YHR138C	2.41187322	0	2756.33333	I	I
YHR143W	0.46644	1.68619	0.27662	0.27662	14	19	29	YHR143W	0.17194238	10.1719424	YHR143W	YHR143W	2.50545028	0	1805.5	I	I
YHR147C	0.14289	1.63413	0.08744	0.08744	14	0	10	YHR147C	-0.616926981	9.38307302	YHR147C	YHR147C	2.45648164	0.00000221	711.909091	I	I
YHR149C	0.40597	2.12259	0.19126	0.19126	9	7	17	YHR149C	-0.535719841	9.46428016	YHR149C	SKG6	2.43283582	0.0000788	859.8	I	I
YHR151C	0.23452	2.00844	0.11677	0.11677	0	0	10	YHR151C	-0.445811936	9.55418806	YHR151C	YHR151C	2.38286098	0	2196	I	I
YHR152W	0.33352	1.70506	0.1956	0.1956	79	33	43	YHR152W	-0.498016526	9.50198347	YHR152W	SPO12	2.32869361	0.000727	350.242424	I	I
YHR159W	0.42158	2.01812	0.2089	0.2089	10	3	13	YHR159W	-0.979458856	9.02054114	YHR159W	YHR159W	2.48633238	0.00000016	1330.2	I	I
YHR161C	0.29176	1.81822	0.16046	0.16046	52	11	21	YHR161C	-0.500916781	9.49908322	YHR161C	YAP1801	2.36625859	0.0000125	660.705882	I	I
YHR162W	0.03668	1.27469	0.02878	0.02878	15	0	10	YHR162W	-0.17608822	9.82391178	YHR162W	MPC2	2.38185477	0.0000186	1792	I	I
YHR163W	0.2224	1.75412	0.12679	0.12679	11	13	23	YHR163W	0.32855615	10.3285562	YHR163W	SOL3	2.42646319	0.00000995	1633.5	I	I
YHR164C	0.20769	1.992	0.10426	0.10426	18	0	10	YHR164C	-0.512517801	9.4874822	YHR164C	YHR164C	2.31360054	0.0000225	880.875	I	I
YHR165C	0.08585	1.85297	0.04633	0.04633	93	4	14	YHR165C	-0.21669179	9.78330821	YHR165C	DBF3	2.24383699	0.000397	263.784091	I	I
YHR167W	0.19177	1.63314	0.11743	0.11743	29	8	18	YHR167W	-0.408108621	9.59189138	YHR167W	THP2	2.39409693	0.0000494	314.975	I	I
YHR169W	0.05293	1.51673	0.0349	0.0349	158	46	-0.156381253	YHR169W	-0.062978275	9.93702173	YHR169W	YHR169W	2.29951367	0.0000504	282.779412	I	I
YHR170W	0.04814	1.45431	0.0331	0.0331	60	3	13	YHR170W	1.29434107	11.2943411	YHR170W	YHR170W	2.41539494	0.000252	301.608696	I	I
YHR176W	0.2695	1.93777	0.13908	0.13908	2	0	10	YHR176W	-0.321100971	9.67889903	YHR176W	YHR176W	2.36206607	0	2176.25	I	I
YHR177W	0.52239	1.771	0.29497	0.29497	2	1	11	YHR177W	-0.718435906	9.28156409	YHR177W	YHR177W	2.41187322	0	2756.33333	I	I
YHR178W	0.11677	1.77247	0.06588	0.06588	4	0	10	YHR178W	-0.535719841	9.46428016	YHR178W	STB5	2.40315278	0.00000008	1790.4	I	I
YHR187W	0.18833	2.22334	0.08471	0.08471	19	8	18	YHR187W	-0.602425706	9.39757429	YHR187W	YHR187W	2.34814691	0.0000361	734.363636	I	I
YHR190W	0.05818	1.2224	0.04759	0.04759	16	0	10	YHR190W	1.75838187	11.7583819	YHR190W	YHR190W	2.48784169	0.000018	457.875	I	I
YHR191C	0.21766	1.57045	0.1386	0.1386	8	0	10	YHR191C	-1.10707008	8.89292992	YHR191C	CTF8	2.36407848	0.0000159	1495.875	I	I
YHR196W	0.25925	1.8332	0.14142	0.14142	78	10	20	YHR196W	0.1835434	10.1835434	YHR196W	YHR196W	2.30739561	0.0000726	261.83871	I	I
YHR199C	0.18998	2.38819	0.07955	0.07955	11	0	10	YHR199C	-0.680732591	9.31926741	YHR199C	AIM46	2.37564984	0.00000046	1628.28571	I	I
YHR200W	0.08159	1.66438	0.04902	0.04902	476	46	-0.156381253	YHR200W	-0.677832336	9.32216766	YHR200W	MCB1	2.29850746	0.000161	301.166667	I	I
YHR201C	0.27308	1.91974	0.14225	0.14225	5	1	11	YHR201C	-0.329801736	9.67019827	YHR201C	YHR201C	2.61412041	0.0000298	830	I	I
YHR202W	0.22399	1.93977	0.11547	0.11547	5	0	10	YHR202W	-0.347203266	9.65279674	YHR202W	YHR202W	2.37900386	0	1878.5	I	I
YHR205W	0.08715	1.75506	0.04965	0.04965	83	27	37	YHR205W	0.029829885	10.0298299	YHR205W	YHR205W	2.32114707	0.000238	907	I	I
YHR206W	0.10086	1.93241	0.0522	0.0522	65	9	19	YHR206W	-0.283397655	9.71660235	YHR206W	POS9	2.36927721	0.00000101	990.384615	I	I
YHR208W	0.05044	1.40015	0.03603	0.03603	14	0	10	YHR208W	2.04840737	12.0484074	YHR208W	BAT1	2.45161831	0.0000209	563.75	I	I
YIL001W	0.22816	1.95429	0.11675	0.11675	1	0	10	YIL001W	-0.529919331	9.47008067	YIL001W	YIL001W	2.44658729	0.00000774	1092.8	I	I
YIL005W	0.3426	1.76415	0.1942	0.1942	17	0	10	YIL005W	-0.2224923	9.7775077	YIL005W	EPS1	2.34160657	0.00000331	1224.11111	I	I
YIL016W	0.23833	2.04505	0.11654	0.11654	94	9	19	YIL016W	0.07913422	10.0791342	YIL016W	SNL1	2.3681033	0.0000255	359.483871	I	I
YIL020C	0.11795	2.06418	0.05714	0.05714	3	0	10	YIL020C	-0.283397655	9.71660235	YIL020C	YIL020C	2.38185477	0.00000472	1861.75	I	I
YIL021W	0.04007	1.44705	0.02769	0.02769	81	5	15	YIL021W	0.05593218	10.0559322	YIL021W	YIL021W	2.3868858	0.000225	320.357143	I	I
YIL022W	0.07107	1.76579	0.04025	0.04025	27	2	12	YIL022W	-0.579223666	9.42077633	YIL022W	YIL022W	2.42377998	0.0000967	455.65	I	I
YIL026C	0.1832	1.91785	0.09553	0.09553	25	5	15	YIL026C	0.035630395	10.0356304	YIL026C	SCC3	2.3070602	0.0000817	635.642857	I	I
YIL031W	0.29729	2.05366	0.14476	0.14476	11	6	16	YIL031W	-0.382006326	9.61799367	YIL031W	YIL031W	2.36592319	0.00000452	889.733333	I	I
YIL033C	0.0697	1.77302	0.03931	0.03931	48	7	17	YIL033C	0.13713932	10.1371393	YIL033C	BCY1	2.34311588	0.000095	844.866667	I	I
YIL034C	0.12644	1.4156	0.08932	0.08932	20	4	14	YIL034C	0.383660995	10.383661	YIL034C	YIL034C	2.35217173	0.0000231	705.9	I	I
YIL035C	0.06006	1.56173	0.03845	0.03845	368	110	0.262260584	YIL035C	0.27055105	10.2705511	YIL035C	CKA1	2.22119738	0.000419	260.693333	I	I
YIL038C	0.1553	1.85697	0.08363	0.08363	90	14	24	YIL038C	-0.463213466	9.53678653	YIL038C	NOT3	2.29984907	0.0000712	419.931818	I	I
YIL039W	0.18821	1.835	0.10257	0.10257	2	0	10	YIL039W	0.331456405	10.3314564	YIL039W	TED1	2.36944491	0.0000338	1929.5	I	I
YIL040W	0.23656	1.47048	0.16087	0.16087	6	9	19	YIL040W	0.853502305	10.8535023	YIL040W	YIL040W	2.46738219	0	2760.5	I	I
YIL041W	0.06818	1.47445	0.04624	0.04624	17	1	11	YIL041W	0.911507405	10.9115074	YIL041W	GVP36	2.35820896	0.00000245	1205.57143	I	I
YIL042C	0.11704	2.07539	0.0564	0.0564	5	0	10	YIL042C	-0.860548401	9.1394516	YIL042C	YIL042C	2.41019621	0	2892.66667	I	I
YIL043C	0.12451	1.64207	0.07583	0.07583	31	5	15	YIL043C	0.325655895	10.3256559	YIL043C	YIL043C	2.29750126	0.0000154	1019.5625	I	I
YIL044C	0.23679	1.40114	0.169	0.169	10	7	17	YIL044C	-0.196390005	9.80361	YIL044C	AGE2	2.50846889	0	1938.5	I	I
YIL055C	0.29346	1.88015	0.15609	0.15609	4	4	14	YIL055C	-0.567622646	9.43237735	YIL055C	YIL055C	2.37229582	0.0000142	1384	I	I
YIL056W	0.14419	1.7184	0.08391	0.08391	11	5	15	YIL056W	-0.15868669	9.84131331	YIL056W	YIL056W	2.40482978	0.0000189	598.071429	I	I
YIL063C	0.40835	1.84818	0.22095	0.22095	43	21	31	YIL063C	0.0095281	10.0095281	YIL063C	YRB2	2.30840181	0.00000061	1614.55556	I	I
YIL066C	0.05506	1.62326	0.03392	0.03392	36	4	14	YIL066C	1.39004948	11.3900495	YIL066C	DIN1	2.46000335	0.00000131	578.6	I	I
YIL072W	0.16103	1.90253	0.08464	0.08464	8	0	10	YIL072W	-0.396507601	9.6034924	YIL072W	HOP1	2.58862988	0.00000011	1250.33333	I	I
YIL074C	0.04325	1.79786	0.02406	0.02406	36	204	214	YIL074C	0.981113525	10.9811135	YIL074C	YIL074C	2.42159987	0.00000742	583.25	I	I
YIL075C	0.05612	1.82184	0.03081	0.03081	80	2	12	YIL075C	0.36915972	10.3691597	YIL075C	SEN3	2.29565655	0.000101	236.831169	I	I
YIL084C	0.07212	1.88699	0.03822	0.03822	34	11	21	YIL084C	-0.109382355	9.89061765	YIL084C	YIL084C	2.41338253	0.00000868	334.684211	I	I
YIL091C	0.18355	1.89217	0.097	0.097	27	4	14	YIL091C	0.0675332	10.0675332	YIL091C	UTP25	2.29213483	0.000105	562.392857	I	I
YIL094C	0.04324	1.48945	0.02903	0.02903	68	3	13	YIL094C	1.35234617	11.3523462	YIL094C	YIL094C	2.30219688	0.000216	191.958333	I	I
YIL095W	0.29388	2.20363	0.13336	0.13336	102	15	-0.359160892	YIL095W	-0.518318311	9.48168169	YIL095W	PAK1	2.37279893	0.00000547	902.230769	I	I
YIL096C	0.18421	2.51181	0.07334	0.07334	9	5	15	YIL096C	-0.384906581	9.61509342	YIL096C	YIL096C	2.36323998	0.00000443	1133	I	I
YIL097W	0.20612	1.99265	0.10344	0.10344	8	1	11	YIL097W	-0.277597145	9.72240286	YIL097W	FYV10	2.37833305	0.0000144	1216.875	I	I
YIL107C	0.10826	1.97084	0.05493	0.05493	34	4	14	YIL107C	-0.115182865	9.88481714	YIL107C	PFK26	2.27788026	0.0000192	702.571429	I	I
YIL112W	0.30768	2.55454	0.12045	0.12045	33	13	23	YIL112W	-0.28629791	9.71370209	YIL112W	YIL112W	2.34546369	0.00000797	719.777778	I	I
YIL113W	0.36547	1.85062	0.19749	0.19749	17	1	11	YIL113W	-1.08096778	8.91903222	YIL113W	YIL113W	2.46738219	0	2760.5	I	I
YIL118W	0.05483	1.44802	0.03787	0.03787	88	16	26	YIL118W	0.267650795	10.2676508	YIL118W	YIL118W	2.64011404	0	2748	I	I
YIL124W	0.13751	1.95042	0.0705	0.0705	29	0	10	YIL124W	0.09073524	10.0907352	YIL124W	YIL124W	2.33657555	0.0000694	632.6	I	I
YIL125W	0.04679	1.81628	0.02576	0.02576	32	3	13	YIL125W	0.94921072	10.9492107	YIL125W	OGD1	2.36575549	0.0000253	300.888889	I	I
YIL126W	0.11155	1.88605	0.05914	0.05914	128	14	-0.365702171	YIL126W	0.28795258	10.2879526	YIL126W	NPS1	2.25289284	0.000263	273.406977	I	I
YIL128W	0.20501	1.84935	0.11086	0.11086	22	1	11	YIL128W	-0.068778785	9.93122122	YIL128W	MMS19	2.30001677	0.000107	605.413793	I	I
YIL132C	0.25627	1.42786	0.17948	0.17948	7	7	17	YIL132C	-0.451612446	9.54838755	YIL132C	CSM2	2.38453798	0.0000652	2142.4	I	I
YIL135C	0.18258	1.46414	0.1247	0.1247	43	9	19	YIL135C	-0.747438456	9.25256154	YIL135C	VHS2	2.45094751	0.0000818	814.4	I	I
YIL136W	0.12228	2.06218	0.05929	0.05929	15	0	10	YIL136W	-0.13548465	9.86451535	YIL136W	YIL136W	2.45983565	0.00000037	1173	I	I
YIL138C	0.09118	2.16163	0.04218	0.04218	262	159	0.58278324	YIL138C	1.14352781	11.1435278	YIL138C	TPM2	2.3873889	0.00000766	387.380952	I	I
YIL140W	0.21379	1.89787	0.11265	0.11265	18	1	11	YIL140W	-0.080379805	9.9196202	YIL140W	SRO4	2.40063726	0.0000145	1654	I	I
YIL142W	0.03185	1.55147	0.02053	0.02053	65	5	15	YIL142W	0.39236176	10.3923618	YIL142W	CCT2	2.29615965	0.000286	114.409722	I	I
YIL143C	0.04498	1.57842	0.0285	0.0285	29	1	11	YIL143C	0.2415485	10.2415485	YIL143C	SSL2	2.36994801	0.0000545	483.263158	I	I
YIL144W	0.12828	2.23964	0.05728	0.05728	92	16	26	YIL144W	-0.428410406	9.57158959	YIL144W	YIL144W	2.32148248	0.0000581	662.125	I	I
YIL145C	0.16596	1.83293	0.09054	0.09054	6	0	10	YIL145C	-0.469013976	9.53098602	YIL145C	PAN6	2.41992286	0	2134.5	I	I
YIL150C	0.2049	2.1433	0.0956	0.0956	24	0	10	YIL150C	-0.643029276	9.35697072	YIL150C	YIL150C	2.3459668	0.0000434	1269.66667	I	I
YIL151C	0.17781	1.66797	0.1066	0.1066	17	0	10	YIL151C	-0.27469689	9.72530311	YIL151C	YIL151C	2.49538823	0.00000066	1764.5	I	I
YIL153W	0.13625	1.89612	0.07186	0.07186	25	2	12	YIL153W	-0.724236416	9.27576358	YIL153W	YIL153W	2.35753815	0.000191	513.571429	I	I
YIL157C	0.17774	1.37452	0.12931	0.12931	6	0	10	YIL157C	0.250249265	10.2502493	YIL157C	COA1	2.4497736	0.0000003	1969.33333	I	I
YIL159W	0.27032	2.1216	0.12741	0.12741	59	9	19	YIL159W	-0.17028771	9.82971229	YIL159W	BNR1	2.34076807	0.0000114	733.933333	I	I
YIL160C	0.08858	1.87711	0.04719	0.04719	6	6	16	YIL160C	-0.173187965	9.82681204	YIL160C	FOX3	2.38336408	0.00000471	1106.28571	I	I
YIL161W	0.59925	1.99274	0.30072	0.30072	24	19	29	YIL161W	-0.248594595	9.75140541	YIL161W	YIL161W	2.32081167	0.0000109	461.857143	I	I
YIR001C	0.27578	1.87269	0.14726	0.14726	44	38	48	YIR001C	-0.144185415	9.85581459	YIR001C	SGN1	2.41053161	0.0000107	330.142857	I	I
YIR002C	0.22055	1.81078	0.1218	0.1218	21	1	11	YIR002C	-0.196390005	9.80361	YIR002C	YIR002C	2.32835821	0.00000052	1188.27273	I	I
YIR007W	0.17854	1.65478	0.10789	0.10789	12	0	10	YIR007W	-0.498016526	9.50198347	YIR007W	YIR007W	2.33992957	0.00000231	1454.5	I	I
YIR009W	0.15887	1.41449	0.11231	0.11231	30	10	20	YIR009W	-0.814144321	9.18585568	YIR009W	YIR009W	2.42612779	0.00000739	469.733333	I	I
YIR010W	0.19435	1.71345	0.11343	0.11343	648	202	0.864058224	YIR010W	-0.631428256	9.36857174	YIR010W	DSN1	2.28844541	0.0000722	451.289474	I	I
YIR022W	0.07054	1.14788	0.06145	0.06145	17	0	10	YIR022W	0.27635156	10.2763516	YIR022W	SEC11	2.47526413	0.0000143	482.125	I	I
YIR027C	0.18031	1.55202	0.11618	0.11618	0	0	10	YIR027C	-0.567622646	9.43237735	YIR027C	YIR027C	2.78433674	0	2030	I	I
YIR029W	0.18648	1.61039	0.1158	0.1158	3	0	10	YIR029W	-0.09488108	9.90511892	YIR029W	YIR029W	2.51366762	0	1764	I	I
YIR035C	0.09915	1.90641	0.05201	0.05201	9	0	10	YIR035C	0.783896185	10.7838962	YIR035C	YIR035C	2.34093577	0.00000928	1535	I	I
YIR036C	0.20855	1.8207	0.11455	0.11455	9	0	10	YIR036C	-0.848947381	9.15105262	YIR036C	YIR036C	2.32517189	0.0000009	1635.75	I	I
YJL002C	0.2323	1.85179	0.12545	0.12545	26	4	14	YJL002C	0.20094493	10.2009449	YJL002C	OST1	2.37732685	0.000184	562.611111	I	I
YJL004C	0.18884	1.8753	0.1007	0.1007	23	1	11	YJL004C	-0.785141771	9.21485823	YJL004C	SYS1	2.38135167	0.0000233	348.121212	I	I
YJL020C	0.48797	2.021	0.24145	0.24145	93	16	26	YJL020C	-0.509617546	9.49038245	YJL020C	BBC1	2.29901057	0.0000382	595.230769	I	I
YJL023C	0.42657	1.98758	0.21462	0.21462	9	0	10	YJL023C	-0.628528001	9.371472	YJL023C	PET130	2.32030857	0	2195.66667	I	I
YJL025W	0.23707	1.82262	0.13007	0.13007	8	0	10	YJL025W	-0.332701991	9.66729801	YJL025W	YJL025W	2.35284253	0.0000179	803.866667	I	I
YJL029C	0.18119	2.22444	0.08146	0.08146	33	7	17	YJL029C	-0.11228261	9.88771739	YJL029C	YJL029C	2.37866846	0.00000289	1129.2	I	I
YJL030W	0.10514	1.73521	0.06059	0.06059	34	3	13	YJL030W	-0.819944831	9.18005517	YJL030W	MAD2	2.39979876	0.0000818	303	I	I
YJL047C	0.32581	1.95408	0.16673	0.16673	23	8	18	YJL047C	-0.538620096	9.4613799	YJL047C	CUL8	2.36525239	0.0000714	502.157895	I	I
YJL051W	0.25449	1.64768	0.15446	0.15446	16	1	11	YJL051W	-0.576323411	9.42367659	YJL051W	YJL051W	2.40566829	0.00000011	1881.8	I	I
YJL058C	0.18043	2.16976	0.08315	0.08315	32	2	12	YJL058C	-0.611126471	9.38887353	YJL058C	BIT61	2.37464364	0.000393	518.235294	I	I
YJL060W	0.08692	1.90629	0.04559	0.04559	11	3	13	YJL060W	0.679487005	10.679487	YJL060W	BNA3	2.30018447	0.000023	642.5	I	I
YJL062W	0.19657	1.65052	0.1191	0.1191	7	6	16	YJL062W	-0.289198165	9.71080184	YJL062W	YJL062W	2.38185477	0.00000156	1275.42857	I	I
YJL066C	0.22223	1.84052	0.12074	0.12074	18	0	10	YJL066C	-0.07167904	9.92832096	YJL066C	MPM1	2.47928895	0.00000746	435.333333	I	I
YJL072C	0.11413	1.65433	0.06899	0.06899	22	7	17	YJL072C	-0.622727491	9.37727251	YJL072C	YJL072C	2.36474929	0.000271	210.761905	I	I
YJL081C	0.12415	2.07488	0.05983	0.05983	53	5	15	YJL081C	-0.442911681	9.55708832	YJL081C	YJL081C	2.32802281	0.0000314	303.45	I	I
YJL082W	0.09314	1.96799	0.04733	0.04733	13	0	10	YJL082W	0.03273014	10.0327301	YJL082W	IML2	2.31846386	0.0000287	1067.42857	I	I
YJL088W	0.10884	2.00447	0.0543	0.0543	12	3	13	YJL088W	0.69978879	10.6997888	YJL088W	ARG3	2.42159987	0.0000199	853	I	I
YJL098W	0.2973	2.14723	0.13846	0.13846	96	9	0.657616239	YJL098W	-0.178988475	9.82101153	YJL098W	YJL098W	2.25909777	0.000107	431.867925	I	I
YJL100W	0.24028	1.72828	0.13903	0.13903	1	0	10	YJL100W	-0.727136671	9.27286333	YJL100W	YJL100W	2.34563139	0.00000249	1835.14286	I	I
YJL101C	0.12557	1.92186	0.06534	0.06534	4	0	10	YJL101C	-0.254395105	9.7456049	YJL101C	GSH1	2.29582425	0.0000114	753.826087	I	I
YJL104W	0.12117	1.65302	0.0733	0.0733	19	0	10	YJL104W	-1.0345637	8.9654363	YJL104W	PAM16	2.4905249	0.0000256	712	I	I
YJL109C	0.13342	1.81468	0.07352	0.07352	81	3	13	YJL109C	0.296653345	10.2966534	YJL109C	YJL109C	2.24618481	0.00021	287.313954	I	I
YJL110C	0.40079	2.18027	0.18383	0.18383	85	7	17	YJL110C	-0.837346361	9.16265364	YJL110C	GZF3	2.33607245	0.0000543	1040.5	I	I
YJL117W	0.19819	1.85753	0.1067	0.1067	66	1	11	YJL117W	0.540274765	10.5402748	YJL117W	PHO86	2.43602214	0.0000866	343.290323	I	I
YJL122W	0.14257	1.57504	0.09052	0.09052	37	2	12	YJL122W	1.02461735	11.0246174	YJL122W	ALB1	2.37782995	0.0000446	315.192308	I	I
YJL123C	0.23776	2.15584	0.11029	0.11029	29	13	23	YJL123C	0.064632945	10.064633	YJL123C	MTC1	2.34479289	0.00000151	1455.77778	I	I
YJL129C	0.21632	2.02469	0.10684	0.10684	17	6	16	YJL129C	-0.335602246	9.66439776	YJL129C	YJL129C	2.30303538	0.00000399	1386.63636	I	I
YJL131C	0.25403	2.27906	0.11146	0.11146	8	6	16	YJL131C	-0.541520351	9.45847965	YJL131C	AIM23	2.31829616	0.00000239	1190.08333	I	I
YJL132W	0.34606	1.86615	0.18544	0.18544	1	0	10	YJL132W	-0.547320861	9.45267914	YJL132W	YJL132W	2.78433674	0	2030	I	I
YJL145W	0.14243	2.2264	0.06397	0.06397	1	0	10	YJL145W	1.01881684	11.0188168	YJL145W	SFH5	2.38487339	0.00000252	2142.2	I	I
YJL146W	0.18474	2.13272	0.08662	0.08662	12	2	12	YJL146W	-0.532819586	9.46718041	YJL146W	YJL146W	2.38369948	0.00000404	1016.22222	I	I
YJL148W	0.28055	1.83475	0.15291	0.15291	64	17	27	YJL148W	0.31695513	10.3169551	YJL148W	YJL148W	2.3885628	0.00000617	386.25	I	I
YJL153C	0.127	2.10489	0.06033	0.06033	20	1	11	YJL153C	0.09073524	10.0907352	YJL153C	INO1	2.51718933	0.00000025	623.625	I	I
YJL154C	0.11978	1.69826	0.07053	0.07053	33	5	15	YJL154C	-0.04267649	9.95732351	YJL154C	VPT7	2.29901057	0.0000941	436	I	I
YJL155C	0.08419	2.05212	0.04103	0.04103	20	8	18	YJL155C	-0.236993575	9.76300643	YJL155C	FBP26	2.41019621	0.00000239	919.2	I	I
YJL161W	0.41268	1.79274	0.2302	0.2302	3	0	10	YJL161W	-0.935955031	9.06404497	YJL161W	YJL161W	2.38504109	0	2677	I	I
YJL162C	0.4472	2.18569	0.2046	0.2046	10	9	19	YJL162C	-0.692333611	9.30766639	YJL162C	YJL162C	2.34244508	0.000132	205.661017	I	I
YJL165C	0.14512	2.28337	0.06356	0.06356	75	13	23	YJL165C	-0.373305561	9.62669444	YJL165C	HAL5	2.46754989	0.00000066	975.4	I	I
YJL166W	0.04013	1.51381	0.02651	0.02651	11	0	10	YJL166W	1.30014158	11.3001416	YJL166W	YJL166W	2.50310247	0.0000148	1196.66667	I	I
YJL167W	0.0682	1.32936	0.0513	0.0513	25	2	12	YJL167W	2.46894434	12.4689443	YJL167W	ERG20	2.39292303	0.00000314	1350	I	I
YJL173C	0.07922	1.72045	0.04605	0.04605	41	4	14	YJL173C	-0.324001226	9.67599878	YJL173C	RFA3	2.34345128	0.0000142	635.85	I	I
YJL180C	0.23867	1.95389	0.12215	0.12215	6	0	10	YJL180C	-0.602425706	9.39757429	YJL180C	YJL180C	2.40214657	0.0000306	1096.71429	I	I
YJL181W	0.66102	2.05769	0.32125	0.32125	1	0	10	YJL181W	-0.831545851	9.16845415	YJL181W	YJL181W	2.46218346	0.00000008	1999.33333	I	I
YJL183W	0.16175	1.78887	0.09042	0.09042	27	0	10	YJL183W	0.31695513	10.3169551	YJL183W	YJL183W	2.37900386	0.000119	437.791667	I	I
YJL184W	0.18843	2.07205	0.09094	0.09094	21	12	22	YJL184W	-1.17957645	8.82042355	YJL184W	GON7	2.35015932	0.0000182	867.571429	I	I
YJL186W	0.28056	1.93874	0.14471	0.14471	8	2	12	YJL186W	-0.045576745	9.95442326	YJL186W	YJL186W	2.39627704	0.00000021	1918.75	I	I
YJL194W	0.16386	1.83093	0.0895	0.0895	34	5	15	YJL194W	-0.387806836	9.61219316	YJL194W	YJL194W	2.45413383	0.00000746	345.75	I	I
YJL201W	0.1341	1.58938	0.08437	0.08437	3	2	12	YJL201W	-0.20509077	9.79490923	YJL201W	YJL201W	2.35351333	0.00000182	962.9	I	I
YJL203W	0.42248	2.062	0.20489	0.20489	44	9	19	YJL203W	-0.622727491	9.37727251	YJL203W	PRP21	2.33875566	0.0000612	375.090909	I	I
YJL207C	0.21284	1.9943	0.10672	0.10672	20	3	13	YJL207C	-0.24569434	9.75430566	YJL207C	YJL207C	2.33204763	0.000342	542.26087	I	I
YJR006W	0.20426	1.79551	0.11376	0.11376	7	0	10	YJR006W	-0.057177765	9.94282224	YJR006W	SDP5	2.35049472	0.00000175	1334.625	I	I
YJR007W	0.02515	1.09252	0.02302	0.02302	52	5	15	YJR007W	2.2137219	12.2137219	YJR007W	YJR007W	2.34579909	0.000021	454.476191	I	I
YJR010C-A	0.21913	1.52231	0.14395	0.14395	86	0	10	YJR010C-A	-0.761939731	9.23806027	YJR010C-A	YJR010C-A	2.39091062	0.0000833	512.4	I	I
YJR010W	0.06142	1.45246	0.04228	0.04228	4	0	10	YJR010W	1.50025917	11.5002592	YJR010W	YJR010W	2.34177427	0.00000792	1582.25	I	I
YJR032W	0.23678	2.02603	0.11687	0.11687	38	6	16	YJR032W	-0.028175215	9.97182479	YJR032W	YJR032W	2.31225893	0.00000041	1503.9	I	I
YJR043C	0.28194	2.62509	0.1074	0.1074	21	10	20	YJR043C	-0.19348975	9.80651025	YJR043C	POL32	2.30773101	0.00000523	971.4375	I	I
YJR044C	0.05858	1.46241	0.04006	0.04006	14	4	14	YJR044C	0.23574799	10.235748	YJR044C	VPS55	2.31980547	0.000185	1378.8	I	I
YJR049C	0.08871	1.85905	0.04772	0.04772	23	3	13	YJR049C	-0.628528001	9.371472	YJR049C	YJR049C	2.62435016	0.0000771	1065	I	I
YJR052W	0.23085	2.13607	0.10807	0.10807	12	1	11	YJR052W	-0.361704541	9.63829546	YJR052W	YJR052W	2.38286098	0.00000238	957.555556	I	I
YJR053W	0.28238	1.94048	0.14552	0.14552	22	1	11	YJR053W	-0.390707091	9.60929291	YJR053W	YJR053W	2.35569344	0.0000202	787.733333	I	I
YJR059W	0.16773	1.84637	0.09084	0.09084	277	33	-0.241417876	YJR059W	-0.039776235	9.96022377	YJR059W	STK2	2.47191011	0.00000047	1194.8	I	I
YJR060W	0.29125	2.0546	0.14175	0.14175	36	15	25	YJR060W	-0.300799186	9.69920082	YJR060W	YJR060W	2.34814691	0.0000085	1725.71429	I	I
YJR062C	0.30629	2.17916	0.14055	0.14055	19	0	10	YJR062C	-0.492216016	9.50778398	YJR062C	NTA1	2.30773101	0.000109	740	I	I
YJR063W	0.03154	1.30357	0.0242	0.0242	25	3	13	YJR063W	0.702689045	10.7026891	YJR063W	RRN4	2.32500419	0.000269	346.25641	I	I
YJR064W	0.03054	1.38363	0.02208	0.02208	56	7	17	YJR064W	0.98981429	10.9898143	YJR064W	YJR064W	2.37414053	0.000376	192.807692	I	I
YJR066W	0.0747	1.87248	0.03989	0.03989	132	12	-0.378784728	YJR066W	-0.361704541	9.63829546	YJR066W	YJR066W	2.27771256	0.0000488	470.674419	I	I
YJR068W	0.07414	1.64222	0.04514	0.04514	46	13	23	YJR068W	0.198044675	10.1980447	YJR068W	RFC2	2.28710381	0.000311	471.088235	I	I
YJR069C	0.11197	2.08889	0.0536	0.0536	8	1	11	YJR069C	0.32855615	10.3285562	YJR069C	YJR069C	2.43283582	0.00000006	1177.42857	I	I
YJR070C	0.0391	1.19836	0.03263	0.03263	21	2	12	YJR070C	2.88658106	12.8865811	YJR070C	YJR070C	2.3672648	0.0000025	1220.2	I	I
YJR073C	0.09184	1.71706	0.05349	0.05349	13	1	11	YJR073C	0.47936941	10.4793694	YJR073C	YJR073C	2.37263123	0.0000477	1811	I	I
YJR075W	0.11384	1.82131	0.0625	0.0625	19	4	14	YJR075W	0.134239065	10.1342391	YJR075W	YJR075W	2.49421432	0.0000304	414.777778	I	I
YJR077C	0.02797	1.30251	0.02147	0.02147	59	8	18	YJR077C	1.72067855	11.7206786	YJR077C	YJR077C	2.37548214	0.000164	197.127273	I	I
YJR080C	0.22485	1.67485	0.13425	0.13425	2	0	10	YJR080C	-0.254395105	9.7456049	YJR080C	AIM24	2.39761865	0.00000004	1919.25	I	I
YJR082C	0.13113	2.08322	0.06295	0.06295	71	25	35	YJR082C	-0.802543301	9.1974567	YJR082C	YJR082C	2.33758175	0.0000188	437.28125	I	I
YJR089W	0.61038	2.19746	0.27776	0.27776	30	9	19	YJR089W	-0.474814486	9.52518551	YJR089W	BIR1	2.38353178	0.000121	1175.375	I	I
YJR091C	0.12366	1.791	0.06905	0.06905	56	15	25	YJR091C	-0.24569434	9.75430566	YJR091C	PUF1	2.35988596	0.0000346	789.066667	I	I
YJR092W	0.49931	2.24499	0.22241	0.22241	39	10	20	YJR092W	-0.300799186	9.69920082	YJR092W	YJR092W	2.3461345	0.0000589	723.461539	I	I
YJR093C	0.20685	2.03147	0.10182	0.10182	58	19	29	YJR093C	-0.442911681	9.55708832	YJR093C	YJR093C	2.29884286	0.000272	335.734694	I	I
YJR096W	0.11664	1.71062	0.06819	0.06819	22	2	12	YJR096W	0.685287515	10.6852875	YJR096W	YJR096W	2.33825256	0.0000127	748.588235	I	I
YJR098C	0.2564	2.16646	0.11835	0.11835	2	0	10	YJR098C	-0.318200716	9.68179929	YJR098C	YJR098C	2.37380513	0	2397.5	I	I
YJR099W	0.32645	1.92811	0.16931	0.16931	3	0	10	YJR099W	-0.460313211	9.53968679	YJR099W	YJR099W	2.46788529	0.0000072	1529.66667	I	I
YJR103W	0.11152	1.69634	0.06574	0.06574	62	2	12	YJR103W	-0.376205816	9.62379419	YJR103W	URA8	2.35720275	0	2044	I	I
YJR110W	0.14544	2.12883	0.06832	0.06832	13	1	11	YJR110W	-0.15288618	9.84711382	YJR110W	YJR110W	2.41036391	0	2318	I	I
YJR111C	0.08553	1.5413	0.05549	0.05549	4	0	10	YJR111C	-0.527019076	9.47298092	YJR111C	YJR111C	2.47593493	0.00000074	1458.33333	I	I
YJR112W	0.16808	2.20061	0.07638	0.07638	123	38	-0.208711482	YJR112W	-1.07516727	8.92483273	YJR112W	YJR112W	2.3681033	0.00000341	855.636364	I	I
YJR116W	0.13536	2.39358	0.05655	0.05655	1	1	11	YJR116W	-0.004973175	9.99502683	YJR116W	TDA4	2.44155626	0	3119.5	I	I
YJR117W	0.06257	1.50587	0.04155	0.04155	52	1	11	YJR117W	1.19863265	11.1986327	YJR117W	YJR117W	2.37648834	0.00000153	1394.28571	I	I
YJR119C	0.26676	1.93331	0.13798	0.13798	10	3	13	YJR119C	-0.294998676	9.70500133	YJR119C	YJR119C	2.33137682	0.00000057	1469.4	I	I
YJR121W	0.00744	0.94042	0.00791	0.00791	38	0	10	YJR121W	2.50084715	12.5008472	YJR121W	YJR121W	2.28224048	0.000328	176.547368	I	I
YJR129C	0.33319	2.03371	0.16383	0.16383	4	1	11	YJR129C	-0.808343811	9.19165619	YJR129C	EFM3	2.51601543	0	3491	I	I
YJR130C	0.12593	1.94344	0.0648	0.0648	15	0	10	YJR130C	-0.384906581	9.61509342	YJR130C	STR2	2.36022137	0.00000151	1627.71429	I	I
YJR132W	0.12061	1.89584	0.06362	0.06362	37	4	14	YJR132W	0.01532861	10.0153286	YJR132W	YJR132W	2.27838336	0.000179	392.142857	I	I
YJR134C	0.35222	2.27132	0.15507	0.15507	71	16	26	YJR134C	-0.25149485	9.74850515	YJR134C	YJR134C	2.35955056	0.00000009	1932.4	I	I
YJR135C	0.4523	1.7651	0.25625	0.25625	29	12	22	YJR135C	-0.611126471	9.38887353	YJR135C	YJR135C	2.37414053	0.00000299	841.583333	I	I
YJR136C	0.4214	1.58968	0.26509	0.26509	2	0	10	YJR136C	-0.753238966	9.24676103	YJR136C	YJR136C	2.33808486	0.0000142	1011.42857	I	I
YJR137C	0.09947	1.58289	0.06284	0.06284	11	0	10	YJR137C	1.10292424	11.1029242	YJR137C	YJR137C	2.3263458	0.000002	989.625	I	I
YJR138W	0.1423	1.93915	0.07338	0.07338	27	3	13	YJR138W	-0.225392555	9.77460745	YJR138W	SEA1	2.22807312	0.000212	439.27451	I	I
YJR139C	0.04631	1.32818	0.03487	0.03487	6	0	10	YJR139C	3.04029458	13.0402946	YJR139C	HOM6	2.43451283	0.0000074	1066	I	I
YJR140C	0.15925	1.87049	0.08514	0.08514	22	0	10	YJR140C	-0.387806836	9.61219316	YJR140C	HIR3	2.33556934	0.00000552	715.45	I	I
YJR148W	0.15497	1.71177	0.09053	0.09053	14	1	11	YJR148W	0.534474255	10.5344743	YJR148W	BAT2	2.34278048	0.00000396	925.714286	I	I
YKL001C	0.02762	1.89893	0.01454	0.01454	7	0	10	YKL001C	0.98401378	10.9840138	YKL001C	MET14	2.57672313	0.00000128	1126.75	I	I
YKL004W	0.05591	1.38154	0.04047	0.04047	22	3	13	YKL004W	-0.225392555	9.77460745	YKL004W	YKL004W	2.44004696	0.000683	1249.4	I	I
YKL008C	0.07437	1.57757	0.04714	0.04714	62	4	14	YKL008C	0.418464055	10.4184641	YKL008C	LAC1	2.27871877	0.000177	320.648148	I	I
YKL009W	0.06869	1.29686	0.05297	0.05297	93	5	15	YKL009W	1.84248926	11.8424893	YKL009W	MRT4	2.31158813	0.0000312	513.724138	I	I
YKL017C	0.14452	1.87334	0.07714	0.07714	9	7	17	YKL017C	-0.00787343	9.99212657	YKL017C	DIP1	2.50343787	0.00000017	1844	I	I
YKL020C	0.25733	1.90637	0.13499	0.13499	21	4	14	YKL020C	-0.022374705	9.9776253	YKL020C	YKL020C	2.36307228	0.0000916	1442.57143	I	I
YKL021C	0.13313	1.78088	0.07476	0.07476	59	10	20	YKL021C	0.441666095	10.4416661	YKL021C	YKL021C	2.48717089	0.000018	407.285714	I	I
YKL022C	0.1211	1.77808	0.06811	0.06811	27	2	12	YKL022C	-0.561822136	9.43817786	YKL022C	YKL022C	2.34311588	0.000093	514.666667	I	I
YKL023W	0.52249	2.26959	0.23021	0.23021	71	39	49	YKL023W	-0.808343811	9.19165619	YKL023W	YKL023W	2.32366259	0.00000076	1421.9	I	I
YKL025C	0.1777	1.78507	0.09955	0.09955	18	8	18	YKL025C	0.000827335	10.0008273	YKL025C	YKL025C	2.37749455	0.000024	945.333333	I	I
YKL028W	0.11967	2.03788	0.05872	0.05872	57	14	24	YKL028W	0.372059975	10.37206	YKL028W	YKL028W	2.32450109	0.0000681	726.25	I	I
YKL033W-A	0.12903	2.04108	0.06322	0.06322	2	0	10	YKL033W-A	-0.15288618	9.84711382	YKL033W-A	YKL033W-A	2.64011404	0	2748	I	I
YKL038W	0.19166	1.74837	0.10962	0.10962	19	4	14	YKL038W	-0.567622646	9.43237735	YKL038W	RGT1	2.38889821	0.00000155	921	I	I
YKL039W	0.15181	1.62123	0.09364	0.09364	15	3	13	YKL039W	0.10813677	10.1081368	YKL039W	YKL039W	2.43216502	0.0000164	539.428571	I	I
YKL042W	0.19498	1.99306	0.09783	0.09783	64	16	26	YKL042W	-0.271796635	9.72820337	YKL042W	SPC42	2.35586114	0.000193	496.952381	I	I
YKL043W	0.30425	1.759	0.17297	0.17297	7	1	11	YKL043W	-0.364604796	9.63539521	YKL043W	PHD1	2.37078652	0.0000192	809.7	I	I
YKL062W	0.22797	1.94373	0.11729	0.11729	36	9	19	YKL062W	0.145840085	10.1458401	YKL062W	MSN4	2.37682375	0.0000351	199.535714	I	I
YKL065C	0.13939	1.44713	0.09632	0.09632	93	17	27	YKL065C	0.308254365	10.3082544	YKL065C	YET1	2.36609089	0.00000452	504.636364	I	I
YKL068W	0.38122	2.18006	0.17487	0.17487	116	7	-0.411491122	YKL068W	-0.796742791	9.20325721	YKL068W	NUP100	2.39141372	0.000155	255.708333	I	I
YKL075C	0.16619	1.93048	0.08609	0.08609	4	6	16	YKL075C	0.17194238	10.1719424	YKL075C	YKL075C	2.35871206	0.0000019	1387.66667	I	I
YKL077W	0.30445	1.9831	0.15352	0.15352	13	2	12	YKL077W	0.418464055	10.4184641	YKL077W	YKL077W	2.3880597	0.00000187	2228.25	I	I
YKL080W	0.03783	1.12602	0.0336	0.0336	35	2	12	YKL080W	0.76939491	10.7693949	YKL080W	VAT3	2.36407848	0.0000114	613.25	I	I
YKL085W	0.04244	1.82692	0.02323	0.02323	51	3	13	YKL085W	1.5756658	11.5756658	YKL085W	MDH1	2.38084857	0.00000189	727.785714	I	I
YKL089W	0.17707	2.30189	0.07693	0.07693	45	4	14	YKL089W	-0.396507601	9.6034924	YKL089W	YKL089W	2.48348147	0.00000061	735.8	I	I
YKL091C	0.08493	1.74042	0.0488	0.0488	29	7	17	YKL091C	0.157441105	10.1574411	YKL091C	YKL091C	2.41472413	0	1985.66667	I	I
YKL093W	0.34748	1.68316	0.20644	0.20644	22	2	12	YKL093W	-0.785141771	9.21485823	YKL093W	MBR1	2.90508133	0	1321	I	I
YKL095W	0.25829	2.62431	0.09842	0.09842	39	11	21	YKL095W	-0.448712191	9.55128781	YKL095W	YJU2	2.33607245	0.0000268	429.9	I	I
YKL098W	0.29321	2.056	0.14261	0.14261	1	0	10	YKL098W	-0.967857836	9.03214216	YKL098W	MTC2	2.44474258	0.00000229	836.444444	I	I
YKL099C	0.10198	1.80447	0.05651	0.05651	20	7	17	YKL099C	-0.242794085	9.75720592	YKL099C	UTP11	2.47660574	0.0000145	394	I	I
YKL100C	0.18051	1.83085	0.0986	0.0986	7	3	13	YKL100C	0.4155638	10.4155638	YKL100C	YKL100C	2.28324669	0.0000123	822.913044	I	I
YKL101W	0.31243	2.10759	0.14824	0.14824	130	18	-0.339537056	YKL101W	-0.416809386	9.58319061	YKL101W	HSL1	2.44205937	0.00000714	692.230769	I	I
YKL103C	0.17702	1.8943	0.09345	0.09345	47	4	14	YKL103C	0.69978879	10.6997888	YKL103C	YSC1	2.36357538	0.0000315	513.136364	I	I
YKL104C	0.03079	1.50969	0.0204	0.0204	86	1	11	YKL104C	1.26823877	11.2682388	YKL104C	YKL104C	2.21281234	0.000473	153.757576	I	I
YKL108W	0.39675	2.29409	0.17294	0.17294	43	14	24	YKL108W	-0.408108621	9.59189138	YKL108W	SLD2	2.38504109	0	2677	I	I
YKL110C	0.09144	1.95292	0.04682	0.04682	16	1	11	YKL110C	-0.25729536	9.74270464	YKL110C	YKL110C	2.4905249	0	1490	I	I
YKL112W	0.17958	2.05946	0.0872	0.0872	39	17	27	YKL112W	0.290852835	10.2908528	YKL112W	ABF1	2.35284253	0.00000373	494.964286	I	I
YKL113C	0.04804	1.87843	0.02557	0.02557	17	0	10	YKL113C	-0.231193065	9.76880694	YKL113C	FEN1	2.40399128	0.0000128	1585.66667	I	I
YKL114C	0.12425	2.1546	0.05767	0.05767	19	0	10	YKL114C	0.018228865	10.0182289	YKL114C	YKL114C	2.40650679	0.0000357	1199.8	I	I
YKL120W	0.04928	1.34713	0.03658	0.03658	24	5	15	YKL120W	0.522873235	10.5228732	YKL120W	OAC1	2.45145061	0.00000371	738.5	I	I
YKL121W	0.26292	2.08061	0.12637	0.12637	18	2	12	YKL121W	-0.495116271	9.50488373	YKL121W	DGR2	2.33590475	0.0000232	964.636364	I	I
YKL122C	0.25987	1.58267	0.1642	0.1642	15	5	15	YKL122C	-0.28629791	9.71370209	YKL122C	YKL122C	2.34361898	0.0000286	1004.91667	I	I
YKL125W	0.10492	1.24333	0.08438	0.08438	12	4	14	YKL125W	-0.06007802	9.93992198	YKL125W	YKL125W	2.40281737	0.00000948	1128.42857	I	I
YKL128C	0.26717	1.79133	0.14914	0.14914	4	0	10	YKL128C	0.105236515	10.1052365	YKL128C	YKL128C	2.63927553	0.00000135	1166	I	I
YKL129C	0.17257	2.00731	0.08597	0.08597	101	10	-0.391867286	YKL129C	-0.289198165	9.71080184	YKL129C	MYO3	2.3260104	0.000472	431.424242	I	I
YKL130C	0.13878	1.59256	0.08715	0.08715	97	10	20	YKL130C	0.145840085	10.1458401	YKL130C	YKL130C	2.34797921	0.0000156	770.3125	I	I
YKL132C	0.34193	1.93717	0.17651	0.17651	2	0	10	YKL132C	-0.796742791	9.20325721	YKL132C	YKL132C	2.46704679	0.00000489	1404.33333	I	I
YKL133C	0.44364	1.88498	0.23535	0.23535	6	4	14	YKL133C	-0.503817036	9.49618296	YKL133C	YKL133C	2.78433674	0	2030	I	I
YKL134C	0.12451	1.94568	0.06399	0.06399	3	0	10	YKL134C	-0.448712191	9.55128781	YKL134C	37165	2.37447593	0.000001	1046	I	I
YKL135C	0.11766	1.83691	0.06405	0.06405	42	2	12	YKL135C	-0.039776235	9.96022377	YKL135C	YKL135C	2.2663089	0.000229	354.660714	I	I
YKL137W	0.10407	2.09449	0.04969	0.04969	1	0	10	YKL137W	-0.338502501	9.6614975	YKL137W	YKL137W	2.39007211	0	2096.75	I	I
YKL139W	0.18431	1.76876	0.10421	0.10421	114	92	0.144517567	YKL139W	-0.674932081	9.32506792	YKL139W	YKL139W	2.40617139	0.00000395	407.7	I	I
YKL140W	0.12174	1.74574	0.06973	0.06973	24	4	14	YKL140W	0.16614187	10.1661419	YKL140W	YKL5	2.34412209	0.00000924	1051	I	I
YKL150W	0.08881	1.81726	0.04887	0.04887	15	4	14	YKL150W	1.1957324	11.1957324	YKL150W	MCR1	2.35804125	0.0000521	825.866667	I	I
YKL170W	0.02965	1.71557	0.01729	0.01729	3	0	10	YKL170W	-0.324001226	9.67599878	YKL170W	YKL170W	2.5096428	0.00000003	1202.66667	I	I
YKL171W	0.24412	1.86717	0.13074	0.13074	65	7	17	YKL171W	-0.761939731	9.23806027	YKL171W	NNK1	2.43568673	0.0000421	1055.16667	I	I
YKL173W	0.2545	2.01706	0.12617	0.12617	75	2	12	YKL173W	-0.498016526	9.50198347	YKL173W	GIN10	2.28961932	0.000136	303.685185	I	I
YKL176C	0.16349	2.00993	0.08134	0.08134	1	0	10	YKL176C	-0.474814486	9.52518551	YKL176C	YKL176C	2.6526916	0.00000044	936.5	I	I
YKL184W	0.207	2.21204	0.09358	0.09358	6	0	10	YKL184W	0.29375309	10.2937531	YKL184W	ORD1	2.33389234	0.0000207	319.528302	I	I
YKL189W	0.05265	1.90119	0.02769	0.02769	12	3	13	YKL189W	-0.13548465	9.86451535	YKL189W	YKL189W	2.44071776	0.00000747	563.111111	I	I
YKL191W	0.22019	1.89469	0.11621	0.11621	18	0	10	YKL191W	-0.440011426	9.55998857	YKL191W	YKL191W	2.3268489	0.000008	776.473684	I	I
YKL192C	0.10352	1.63005	0.06351	0.06351	13	3	13	YKL192C	0.905706895	10.9057069	YKL192C	ACP1	2.44172396	0.0000004	1177.75	I	I
YKL193C	0.14483	1.95868	0.07394	0.07394	46	8	18	YKL193C	0.42716482	10.4271648	YKL193C	SDS22	2.33774945	0.000163	685.666667	I	I
YKL206C	0.21905	1.61638	0.13552	0.13552	14	1	11	YKL206C	-0.759039476	9.24096052	YKL206C	ADD66	2.4080161	0.0000001	1786.25	I	I
YKL210W	0.06333	1.65286	0.03831	0.03831	58	3	13	YKL210W	0.725891085	10.7258911	YKL210W	UBA1	2.29381184	0.0000424	655.310345	I	I
YKL211C	0.1032	1.69215	0.06099	0.06099	40	5	15	YKL211C	0.1835434	10.1835434	YKL211C	TRP3	2.31376824	0.00038	491.428571	I	I
YKL212W	0.11169	1.6245	0.06875	0.06875	36	2	12	YKL212W	0.511272215	10.5112722	YKL212W	YKL212W	2.33892336	0.000027	522.724138	I	I
YKL214C	0.22488	1.74957	0.12854	0.12854	14	0	10	YKL214C	0.267650795	10.2676508	YKL214C	YRA2	2.41908435	0.0000212	642.444444	I	I
YKL216W	0.06668	1.86918	0.03567	0.03567	15	2	12	YKL216W	0.725891085	10.7258911	YKL216W	YKL216W	2.35015932	0	2405.8	I	I
YKR002W	0.04421	1.65843	0.02666	0.02666	43	5	15	YKR002W	-0.07167904	9.92832096	YKR002W	YKR002W	2.32886131	0.0000351	414.294118	I	I
YKR003W	0.10256	1.61224	0.06362	0.06362	44	5	15	YKR003W	-0.271796635	9.72820337	YKR003W	YKR003W	2.32483649	0.000133	394.096774	I	I
YKR008W	0.14823	1.85421	0.07994	0.07994	41	6	16	YKR008W	-0.02527496	9.97472504	YKR008W	RSC4	2.24719101	0.000597	189.201439	I	I
YKR009C	0.13191	2.00142	0.06591	0.06591	19	1	11	YKR009C	-0.283397655	9.71660235	YKR009C	FOX2	2.35737045	0.00000021	1873.33333	I	I
YKR010C	0.65539	2.26375	0.28952	0.28952	27	10	20	YKR010C	-0.547320861	9.45267914	YKR010C	TOF2	2.32383029	0.00000537	809.444444	I	I
YKR015C	0.59627	2.01466	0.29597	0.29597	2	3	13	YKR015C	-0.144185415	9.85581459	YKR015C	YKR015C	2.38671809	0.0000117	1582.33333	I	I
YKR016W	0.21432	1.84242	0.11632	0.11632	232	14	-0.365702171	YKR016W	-0.051377255	9.94862275	YKR016W	YKR016W	2.4279725	0.00000005	2024.25	I	I
YKR018C	0.08068	1.82973	0.04409	0.04409	14	1	11	YKR018C	0.1255383	10.1255383	YKR018C	YKR018C	2.3461345	0.0000347	782.5625	I	I
YKR019C	0.28887	1.79922	0.16055	0.16055	3	0	10	YKR019C	-0.596625196	9.4033748	YKR019C	IRS4	2.40667449	0.00000031	1849.75	I	I
YKR020W	0.3881	1.84574	0.21027	0.21027	31	18	28	YKR020W	-0.07167904	9.92832096	YKR020W	VPS51	2.46419587	0.0000534	927	I	I
YKR021W	0.19205	1.92704	0.09966	0.09966	53	10	20	YKR021W	-0.434210916	9.56578908	YKR021W	YKR021W	2.51601543	0.00000305	970.666667	I	I
YKR023W	0.33242	2.22954	0.1491	0.1491	8	6	16	YKR023W	-0.471914231	9.52808577	YKR023W	YKR023W	2.33959416	0.0000157	1586.71429	I	I
YKR029C	0.37146	1.98837	0.18682	0.18682	23	5	15	YKR029C	-0.637228766	9.36277123	YKR029C	SET3	2.29599195	0.000242	144.722222	I	I
YKR036C	0.39836	1.95537	0.20373	0.20373	40	14	24	YKR036C	-0.576323411	9.42367659	YKR036C	YKR036C	2.33774945	0.0000221	1517	I	I
YKR038C	0.06546	1.97643	0.03312	0.03312	9	0	10	YKR038C	-0.706834886	9.29316511	YKR038C	KAE1	2.28710381	0.0000132	834.952381	I	I
YKR046C	0.09613	1.52752	0.06293	0.06293	48	5	15	YKR046C	0.946310465	10.9463105	YKR046C	YKR046C	2.35904746	0.00000007	2284.6	I	I
YKR050W	0.28405	1.74611	0.16267	0.16267	11	0	10	YKR050W	-0.29209842	9.70790158	YKR050W	TRK2	2.37665605	0.0000148	1016.16667	I	I
YKR053C	0.28051	1.77449	0.15808	0.15808	2	0	10	YKR053C	-0.207991025	9.79200898	YKR053C	YSR3	2.44155626	0	3119.5	I	I
YKR059W	0.01453	0.64314	0.02259	0.02259	305	80	0.066022223	YKR059W	5.58961872	15.5896187	YKR059W	YKR059W	2.26362569	0.000118	277.802632	I	I
YKR062W	0.05769	1.8227	0.03165	0.03165	35	5	15	YKR062W	0.52577349	10.5257735	YKR062W	TFA2	2.31829616	0.00000179	1370.5	I	I
YKR063C	0.30797	2.04414	0.15066	0.15066	82	10	20	YKR063C	-0.454512701	9.5454873	YKR063C	LAS1	2.35938286	0.00000762	1513.375	I	I
YKR066C	0.1248	2.40498	0.05189	0.05189	9	0	10	YKR066C	0.151640595	10.1516406	YKR066C	YKR066C	2.34294818	0.000136	810.571429	I	I
YKR067W	0.13444	2.00049	0.0672	0.0672	16	14	24	YKR067W	0.10813677	10.1081368	YKR067W	YKR067W	2.33909106	0.0000233	327.954546	I	I
YKR069W	0.14852	1.88533	0.07878	0.07878	3	0	10	YKR069W	-0.387806836	9.61219316	YKR069W	MET1	2.74543015	0	1285	I	I
YKR070W	0.12562	1.92687	0.06519	0.06519	3	0	10	YKR070W	-0.184788985	9.81521102	YKR070W	YKR070W	2.43686064	0	2137	I	I
YKR072C	0.21337	1.79486	0.11888	0.11888	47	10	20	YKR072C	0.047231415	10.0472314	YKR072C	HAL3	2.35988596	0.0000956	258.433333	I	I
YKR074W	0.14798	1.80167	0.08214	0.08214	2	2	12	YKR074W	0.14874034	10.1487403	YKR074W	YKR074W	2.51601543	0	3491	I	I
YKR075C	0.31225	2.14293	0.14571	0.14571	4	4	14	YKR075C	-0.086180315	9.91381969	YKR075C	YKR075C	2.78433674	0	2030	I	I
YKR076W	0.15664	1.9923	0.07862	0.07862	6	2	12	YKR076W	0.2995536	10.2995536	YKR076W	GTO2	2.37917156	0.00000005	1868	I	I
YKR077W	0.28705	1.7486	0.16416	0.16416	4	1	11	YKR077W	-0.480614996	9.519385	YKR077W	MSA2	2.43216502	0.0000327	859.75	I	I
YKR078W	0.368	1.88729	0.19499	0.19499	8	6	16	YKR078W	-0.297898931	9.70210107	YKR078W	YKR078W	2.65202079	0.00000004	1153	I	I
YKR079C	0.19398	2.03988	0.09509	0.09509	14	2	12	YKR079C	0.024029375	10.0240294	YKR079C	YKR079C	2.29263793	0.0000265	916	I	I
YKR080W	0.064	1.55951	0.04104	0.04104	15	2	12	YKR080W	0.45036686	10.4503669	YKR080W	MTD1	2.35753815	0.0000139	350.148148	I	I
YKR084C	0.18621	1.79089	0.10397	0.10397	19	5	15	YKR084C	0.041430905	10.0414309	YKR084C	YKR084C	2.37313433	0.00000091	1358	I	I
YKR087C	0.16521	1.76333	0.09369	0.09369	0	0	10	YKR087C	-0.492216016	9.50778398	YKR087C	YKR087C	2.38504109	0	2677	I	I
YKR088C	0.15625	1.68547	0.09271	0.09271	23	1	11	YKR088C	-0.138384905	9.8616151	YKR088C	YKR088C	2.31494214	0.0000101	1124.5	I	I
YKR090W	0.42846	2.06623	0.20736	0.20736	17	3	13	YKR090W	-0.460313211	9.53968679	YKR090W	YKR090W	2.42713399	0.0000165	551.388889	I	I
YKR098C	0.32917	2.26631	0.14524	0.14524	29	5	15	YKR098C	-0.477714741	9.52228526	YKR098C	YKR098C	2.43216502	0	1648.5	I	I
YLL019C	0.08722	1.97569	0.04415	0.04415	50	11	21	YLL019C	-0.2804974	9.7195026	YLL019C	KNS1	2.41623344	0.00000841	1108.83333	I	I
YLL023C	0.16003	1.63139	0.09809	0.09809	28	7	17	YLL023C	0.81579899	10.815799	YLL023C	POM33	2.38101627	0.00000154	1808.83333	I	I
YLL027W	0.19709	1.35025	0.14597	0.14597	10	0	10	YLL027W	-0.735837436	9.26416256	YLL027W	ISA1	2.35049472	0.0000155	1592.625	I	I
YLL029W	0.14207	1.91373	0.07424	0.07424	17	0	10	YLL029W	-0.26309587	9.73690413	YLL029W	YLL029W	2.26312259	0.000039	1133	I	I
YLL033W	0.31166	1.79944	0.1732	0.1732	3	1	11	YLL033W	-0.709735141	9.29026486	YLL033W	YLL033W	2.65990273	0.00000011	1187.33333	I	I
YLL035W	0.22742	1.93804	0.11734	0.11734	6	0	10	YLL035W	-0.506717291	9.49328271	YLL035W	GRC3	2.50897199	0.00000008	945.75	I	I
YLL036C	0.39218	2.03329	0.19288	0.19288	108	2	-0.444197515	YLL036C	-0.579223666	9.42077633	YLL036C	YLL036C	2.27284924	0.000681	232.414286	I	I
YLR002C	0.13049	1.5789	0.08265	0.08265	91	16	26	YLR002C	0.02112912	10.0211291	YLR002C	YLR002C	2.31863156	0.0000513	505.709677	I	I
YLR005W	0.05913	1.83813	0.03217	0.03217	24	4	14	YLR005W	-0.303699441	9.69630056	YLR005W	SSL1	2.35066242	0.0000643	612.555556	I	I
YLR007W	0.27634	1.64267	0.16823	0.16823	7	0	10	YLR007W	-0.776441006	9.22355899	YLR007W	NSE1	2.42579239	0.00000259	1355	I	I
YLR022C	0.12301	1.70939	0.07196	0.07196	26	1	11	YLR022C	0.053031925	10.0530319	YLR022C	SDO1	2.27100453	0.00047	634.384615	I	I
YLR023C	0.19445	1.73245	0.11224	0.11224	3	1	11	YLR023C	0.058832435	10.0588324	YLR023C	YLR023C	2.41438873	0.0000235	1127.83333	I	I
YLR026C	0.10445	1.76738	0.0591	0.0591	95	10	20	YLR026C	-0.10068159	9.89931841	YLR026C	SED5	2.33976186	0.000221	827	I	I
YLR035C	0.39712	1.76906	0.22448	0.22448	10	0	10	YLR035C	-0.474814486	9.52518551	YLR035C	YLR035C	2.32215328	0.00000252	1134.69231	I	I
YLR045C	0.17224	1.67016	0.10313	0.10313	25	14	24	YLR045C	-0.402308111	9.59769189	YLR045C	YLR045C	2.34395439	0.00006	238.25	I	I
YLR049C	0.23688	1.93915	0.12215	0.12215	3	3	13	YLR049C	-0.532819586	9.46718041	YLR049C	YLR049C	2.39292303	0.0000016	1660.6	I	I
YLR058C	0.0234	0.84716	0.02762	0.02762	36	1	11	YLR058C	4.31060627	14.3106063	YLR058C	YLR058C	2.32131477	0.0000124	792.947368	I	I
YLR072W	0.19345	2.00226	0.09662	0.09662	19	8	18	YLR072W	-0.622727491	9.37727251	YLR072W	LTC1	2.35485494	0.0000129	1033.36364	I	I
YLR073C	0.1755	1.22502	0.14326	0.14326	5	2	12	YLR073C	-0.619827236	9.38017276	YLR073C	YLR073C	2.60758008	0.0000012	756	I	I
YLR074C	0.15996	1.60196	0.09985	0.09985	72	2	12	YLR074C	0.215446205	10.2154462	YLR074C	YLR074C	2.33624015	0.000285	158.611111	I	I
YLR077W	0.22921	2.06075	0.11123	0.11123	3	0	10	YLR077W	-0.495116271	9.50488373	YLR077W	FMP25	2.44155626	0	3119.5	I	I
YLR084C	0.2977	2.05253	0.14504	0.14504	14	0	10	YLR084C	-0.503817036	9.49618296	YLR084C	YLR084C	2.40466208	0.00000387	1114.83333	I	I
YLR089C	0.08384	1.5241	0.05501	0.05501	17	1	11	YLR089C	0.273451305	10.2734513	YLR089C	YLR089C	2.40231427	0.00000071	1492.66667	I	I
YLR094C	0.28288	1.78502	0.15847	0.15847	3	0	10	YLR094C	-0.512517801	9.4874822	YLR094C	YLR094C	2.38286098	0.00000511	1125	I	I
YLR201C	0.16206	1.44197	0.11239	0.11239	5	0	10	YLR201C	-0.02527496	9.97472504	YLR201C	YLR201C	2.36994801	0.000428	982.1	I	I
YLR207W	0.17889	1.82792	0.09786	0.09786	22	1	11	YLR207W	-0.347203266	9.65279674	YLR207W	HRD3	2.31779306	0.000121	852.5	I	I
YLR208W	0.02451	1.29053	0.01899	0.01899	52	7	17	YLR208W	1.26823877	11.2682388	YLR208W	SEC13	2.3674325	0.000034	415.2	I	I
YLR209C	0.08373	1.65149	0.0507	0.0507	6	0	10	YLR209C	-0.350103521	9.64989648	YLR209C	YLR209C	2.31578065	0.00000021	1559.44444	I	I
YLR210W	0.22328	1.84056	0.12131	0.12131	50	9	19	YLR210W	-0.402308111	9.59769189	YLR210W	YLR210W	2.41002851	0.00000076	2171.5	I	I
YLR219W	0.36482	1.74913	0.20857	0.20857	14	1	11	YLR219W	-0.753238966	9.24676103	YLR219W	MSC3	2.31578065	0.0000254	1058.76923	I	I
YLR221C	0.36287	2.00857	0.18066	0.18066	45	62	72	YLR221C	-0.120983375	9.87901663	YLR221C	YLR221C	2.28458829	0.0000825	512.1875	I	I
YLR222C	0.145	1.94566	0.07453	0.07453	60	10	20	YLR222C	0.07913422	10.0791342	YLR222C	YLR222C	2.28073118	0.0000384	503.111111	I	I
YLR224W	0.21803	1.48957	0.14637	0.14637	3	0	10	YLR224W	-0.683632846	9.31636715	YLR224W	YLR224W	2.50729499	0.00000467	1798.5	I	I
YLR250W	0.17405	2.06759	0.08418	0.08418	4	3	13	YLR250W	0.296653345	10.2966534	YLR250W	SSP120	2.3474761	0.0000121	1776	I	I
YLR262C	0.03923	1.70372	0.02303	0.02303	110	22	-0.313371941	YLR262C	0.10233626	10.1023363	YLR262C	YPT6	2.33691095	0.0000775	724.611111	I	I
YLR266C	0.38801	1.95494	0.19847	0.19847	8	3	13	YLR266C	-0.329801736	9.67019827	YLR266C	YLR266C	2.44138856	0	2081.33333	I	I
YLR284C	0.20325	1.95569	0.10393	0.10393	7	0	10	YLR284C	-0.819944831	9.18005517	YLR284C	YLR284C	2.37933926	0.00000037	1863.5	I	I
YLR295C	0.17918	1.78347	0.10047	0.10047	16	1	11	YLR295C	0.824499755	10.8244998	YLR295C	YLR295C	2.42411538	0.0000106	1316	I	I
YLR309C	0.32396	2.5226	0.12842	0.12842	91	23	33	YLR309C	-0.07747955	9.92252045	YLR309C	YLR309C	2.2860976	0.0000117	933.526316	I	I
YLR312C	0.41438	1.78437	0.23223	0.23223	2	0	10	YLR312C	-0.524118821	9.47588118	YLR312C	ATG39	2.29683045	0.0000104	873.842105	I	I
YLR314C	0.16066	1.61997	0.09917	0.09917	219	68	-0.012473121	YLR314C	0.325655895	10.3256559	YLR314C	YLR314C	2.38638269	0.0000357	432.473684	I	I
YLR323C	0.41692	2.15148	0.19378	0.19378	10	6	16	YLR323C	-0.727136671	9.27286333	YLR323C	YLR323C	2.37799765	0.00000438	1249.22222	I	I
YLR324W	0.13731	1.74149	0.07885	0.07885	23	0	10	YLR324W	-0.382006326	9.61799367	YLR324W	YLR324W	2.37397283	0.0000169	1504	I	I
YLR328W	0.06093	1.83642	0.03318	0.03318	11	1	11	YLR328W	0.4735689	10.4735689	YLR328W	NMA1	2.42227067	0.0000264	1054	I	I
YLR329W	0.3321	2.02874	0.1637	0.1637	4	0	10	YLR329W	-0.796742791	9.20325721	YLR329W	YLR329W	2.3466376	0.0000009	1758	I	I
YLR335W	0.45722	2.10113	0.21761	0.21761	53	8	18	YLR335W	-0.382006326	9.61799367	YLR335W	YLR335W	2.27720946	0.000146	513.052632	I	I
YLR341W	0.84374	2.21235	0.38138	0.38138	1	0	10	YLR341W	-0.466113721	9.53388628	YLR341W	YLR341W	2.41019621	0	2081	I	I
YLR348C	0.08284	1.66701	0.04969	0.04969	14	1	11	YLR348C	-0.12388363	9.87611637	YLR348C	DIC1	2.66426295	0.0000006	971.333333	I	I
YLR359W	0.02638	1.52582	0.01729	0.01729	8	0	10	YLR359W	2.03680635	12.0368064	YLR359W	ADE13	2.68707027	0.00000006	888.666667	I	I
YLR373C	0.18428	1.76029	0.10469	0.10469	12	6	16	YLR373C	-0.358804286	9.64119572	YLR373C	YLR373C	2.35183632	0.00000165	1026.07692	I	I
YLR380W	0.1235	2.17541	0.05677	0.05677	9	0	10	YLR380W	0.86220307	10.8622031	YLR380W	CSR1	2.3676002	0.00000046	1141.75	I	I
YLR381W	0.33674	1.75398	0.19199	0.19199	11	0	10	YLR381W	-0.353003776	9.64699623	YLR381W	CTF3	2.28894852	0.000073	759.631579	I	I
YLR382C	0.17799	1.89294	0.09403	0.09403	12	0	10	YLR382C	-0.2804974	9.7195026	YLR382C	YLR382C	2.38940131	0.0000115	1503	I	I
YLR383W	0.11308	2.09979	0.05385	0.05385	18	2	12	YLR383W	-0.25149485	9.74850515	YLR383W	RHC18	2.32517189	0.0000289	791.625	I	I
YLR385C	0.37401	1.4848	0.25189	0.25189	22	5	15	YLR385C	-0.500916781	9.49908322	YLR385C	YLR385C	2.33657555	0.0000491	702.4	I	I
YLR386W	0.07315	1.87765	0.03896	0.03896	31	1	11	YLR386W	-0.303699441	9.69630056	YLR386W	VAC14	2.33825256	0.000214	535.16	I	I
YLR394W	0.22194	1.8438	0.12037	0.12037	13	0	10	YLR394W	-0.860548401	9.1394516	YLR394W	ZIP3	2.38336408	0.00000803	1851	I	I
YLR396C	0.20209	1.8105	0.11162	0.11162	25	4	14	YLR396C	-0.422609896	9.5773901	YLR396C	YLR396C	2.34563139	0.000018	607.25	I	I
YLR403W	0.17006	2.11935	0.08024	0.08024	44	11	21	YLR403W	-0.068778785	9.93122122	YLR403W	SFP1	2.35820896	0.00000828	809.857143	I	I
YLR408C	0.17471	2.51859	0.06937	0.06937	11	6	16	YLR408C	-0.576323411	9.42367659	YLR408C	YLR408C	2.45346302	0	2109	I	I
YLR411W	0.06734	2.10148	0.03204	0.03204	4	0	10	YLR411W	-0.068778785	9.93122122	YLR411W	YLR411W	2.5096428	0.00000011	1381	I	I
YLR418C	0.21748	1.97971	0.10985	0.10985	60	0	10	YLR418C	-0.402308111	9.59769189	YLR418C	YLR418C	2.25071273	0.000224	465.744186	I	I
YLR419W	0.18964	2.06197	0.09197	0.09197	5	1	11	YLR419W	-0.062978275	9.93702173	YLR419W	YLR419W	2.39476773	0.00000212	851.375	I	I
YLR422W	0.17163	1.97465	0.08692	0.08692	4	0	10	YLR422W	-0.599525451	9.40047455	YLR422W	YLR422W	2.29230253	0.00000716	1165.4	I	I
YLR431C	0.2939	2.21235	0.13285	0.13285	11	4	14	YLR431C	-0.544420606	9.45557939	YLR431C	YLR431C	2.35653195	0.00000049	1529.5	I	I
YLR433C	0.13633	1.76865	0.07708	0.07708	61	9	19	YLR433C	-0.190589495	9.80941051	YLR433C	CNA1	2.3062217	0.000029	504.793104	I	I
YLR435W	0.20299	2.02537	0.10022	0.10022	11	4	14	YLR435W	1.00721582	11.0072158	YLR435W	YLR435W	2.48364917	0.00000113	949	I	I
YLR438C-A	0.03349	1.42635	0.02348	0.02348	58	6	16	YLR438C-A	-1.0345637	8.9654363	YLR438C-A	SMX4	2.34278048	0.000191	254.37037	I	I
YLR440C	0.36619	1.83107	0.19999	0.19999	19	2	12	YLR440C	-0.422609896	9.5773901	YLR440C	YLR440C	2.39460003	0.0000226	519.6875	I	I
YLR450W	0.09894	1.8823	0.05257	0.05257	39	7	17	YLR450W	0.05593218	10.0559322	YLR450W	YLR450W	2.34496059	0.0000573	443.269231	I	I
YLR452C	0.24533	1.89344	0.12957	0.12957	34	1	11	YLR452C	-0.21669179	9.78330821	YLR452C	YLR452C	2.29951367	0.000742	603.333333	I	I
YML001W	0.00449	1.34419	0.00334	0.00334	104	18	-0.339537056	YML001W	0.31695513	10.3169551	YML001W	YPT7	2.32785511	0.00000528	1236.4	I	I
YML004C	0.13332	1.71896	0.07756	0.07756	6	0	10	YML004C	0.50257145	10.5025715	YML004C	YML004C	2.3674325	0.00000051	1385	I	I
YML005W	0.37333	2.05594	0.18159	0.18159	3	3	13	YML005W	-0.471914231	9.52808577	YML005W	TRM12	2.42042596	0.00000007	1423.8	I	I
YML012W	0.09243	1.04926	0.08809	0.08809	105	9	-0.398408565	YML012W	0.64178369	10.6417837	YML012W	YML012W	2.31192353	0.000246	299.818182	I	I
YML013W	0.23851	1.70108	0.14021	0.14021	36	2	12	YML013W	-0.329801736	9.67019827	YML013W	UBX2	2.31360054	0.00015	535.944444	I	I
YML021C	0.21804	1.71718	0.12697	0.12697	1	0	10	YML021C	-0.576323411	9.42367659	YML021C	UNG1	2.38319638	0.00000004	1814.4	I	I
YML030W	0.05488	1.58303	0.03467	0.03467	47	17	27	YML030W	-0.1064821	9.8935179	YML030W	AIM31	2.38185477	0	1594.6	I	I
YML032C	0.21388	1.94802	0.10979	0.10979	33	8	18	YML032C	-0.585024176	9.41497582	YML032C	RAD52	2.37900386	0.0000471	366.4	I	I
YML042W	0.16497	1.79466	0.09192	0.09192	14	3	13	YML042W	0.145840085	10.1458401	YML042W	CAT2	2.31024652	0.00015	941.071429	I	I
YML043C	0.28462	1.81758	0.15659	0.15659	5	3	13	YML043C	-0.27469689	9.72530311	YML043C	RRN11	2.45966795	0.00000276	665.285714	I	I
YML048W	0.13174	1.70179	0.07741	0.07741	96	7	17	YML048W	0.69398828	10.6939883	YML048W	ECM6	2.36156297	0.00000873	906.461539	I	I
YML061C	0.14143	1.80382	0.07841	0.07841	8	2	12	YML061C	-0.466113721	9.53388628	YML061C	PIF1	2.42042596	0.00000331	997.142857	I	I
YML064C	0.07671	1.4541	0.05275	0.05275	132	12	-0.378784728	YML064C	-1.18827722	8.81172278	YML064C	TEM1	2.43618984	0.00000143	1061.66667	I	I
YML069W	0.04004	1.81191	0.0221	0.0221	61	5	15	YML069W	0.24734901	10.247349	YML069W	POB3	2.32047627	0.000138	312.107143	I	I
YML076C	0.25662	1.81776	0.14117	0.14117	2	0	10	YML076C	-0.425510151	9.57448985	YML076C	WAR1	2.44541338	0	2318	I	I
YML078W	0.07397	1.55574	0.04755	0.04755	107	5	-0.424573679	YML078W	1.50025917	11.5002592	YML078W	CPR3	2.30202918	0.0000224	2077.33333	I	I
YML080W	0.14971	1.89256	0.07911	0.07911	10	0	10	YML080W	-0.06007802	9.93992198	YML080W	YML080W	2.47543183	0.000108	554.571429	I	I
YML082W	0.11202	1.93768	0.05781	0.05781	15	0	10	YML082W	-0.831545851	9.16845415	YML082W	YML082W	2.42260607	0.00000195	1267.57143	I	I
YML088W	0.20653	1.8312	0.11278	0.11278	26	0	10	YML088W	-0.25729536	9.74270464	YML088W	UFO1	2.47140701	0.00000381	893.4	I	I
YML092C	0.01319	1.47144	0.00896	0.00896	68	3	13	YML092C	0.099436005	10.099436	YML092C	PRE8	2.36424618	0.000404	538.136364	I	I
YML093W	0.177	2.1431	0.08259	0.08259	45	22	32	YML093W	0.7635944	10.7635944	YML093W	YML093W	2.33422774	0.0000223	543.307692	I	I
YML095C	0.23374	2.09103	0.11178	0.11178	23	1	11	YML095C	-0.727136671	9.27286333	YML095C	RAD10	2.38319638	0.00000167	1066.71429	I	I
YML096W	0.24901	1.78616	0.13941	0.13941	23	3	13	YML096W	-0.619827236	9.38017276	YML096W	YML096W	2.38369948	0	2249.6	I	I
YML097C	0.26023	2.02907	0.12825	0.12825	18	2	12	YML097C	-0.1644872	9.8355128	YML097C	VPT9	2.3270166	0.0000513	1297	I	I
YML098W	0.14656	2.73687	0.05355	0.05355	44	15	25	YML098W	-0.680732591	9.31926741	YML098W	TAF13	2.33255073	0.0000279	525.517241	I	I
YML106W	0.01931	1.02478	0.01884	0.01884	20	2	12	YML106W	1.04201888	11.0420189	YML106W	URA5	2.39074291	0.0000071	772	I	I
YML110C	0.08856	1.63341	0.05422	0.05422	9	4	14	YML110C	0.49677094	10.4967709	YML110C	DBI56	2.35233943	0.000121	759.636364	I	I
YML111W	0.1276	1.73142	0.0737	0.0737	45	5	15	YML111W	-0.23409332	9.76590668	YML111W	BUL2	2.4276371	0.00000001	1510.8	I	I
YML112W	0.18549	1.55534	0.11926	0.11926	15	2	12	YML112W	-0.12388363	9.87611637	YML112W	CTK3	2.35435184	0.00000139	1476.125	I	I
YML113W	0.26062	1.23653	0.21076	0.21076	10	23	33	YML113W	-1.44930017	8.55069983	YML113W	DAT1	2.34797921	0.00000002	2069.16667	I	I
YML114C	0.28139	1.61981	0.17372	0.17372	32	11	21	YML114C	-0.666231316	9.33376868	YML114C	YML114C	2.36491699	0.0000111	460.148148	I	I
YML117W	0.22204	1.90245	0.11671	0.11671	22	5	15	YML117W	-0.500916781	9.49908322	YML117W	NAB6	2.30269998	0.0000161	490.48	I	I
YML119W	0.38118	1.76299	0.21621	0.21621	4	12	22	YML119W	-0.819944831	9.18005517	YML119W	YML119W	2.37045112	0.0000214	1246	I	I
YML120C	0.0462	1.92813	0.02396	0.02396	38	4	14	YML120C	0.116837535	10.1168375	YML120C	YML120C	2.38453798	0.0000031	661.1875	I	I
YML126C	0.03929	0.94696	0.04149	0.04149	32	2	12	YML126C	2.71546602	12.715466	YML126C	YML126C	2.3275197	0.0000955	498.852941	I	I
YMR003W	0.64543	1.65107	0.39092	0.39092	3	0	10	YMR003W	-0.924354011	9.07564599	YMR003W	AIM34	2.37196042	0	2499.75	I	I
YMR005W	0.19013	2.06327	0.09215	0.09215	39	7	17	YMR005W	-0.573423156	9.42657684	YMR005W	TAF48	2.3473084	0.0000568	347.675676	I	I
YMR010W	0.08979	1.48082	0.06064	0.06064	29	6	16	YMR010W	-0.062978275	9.93702173	YMR010W	YMR010W	2.41573034	0.00000291	1222	I	I
YMR016C	0.37659	2.00543	0.18778	0.18778	30	12	22	YMR016C	-0.483515251	9.51648475	YMR016C	YMR016C	2.43283582	0.00000131	1561	I	I
YMR017W	0.41155	2.40661	0.17101	0.17101	6	8	18	YMR017W	-0.767740241	9.23225976	YMR017W	YMR017W	2.50729499	0.00000006	1300.66667	I	I
YMR018W	0.46827	2.00497	0.23356	0.23356	1	1	11	YMR018W	-0.561822136	9.43817786	YMR018W	YMR018W	2.36910951	0.0000125	2200	I	I
YMR027W	0.19002	1.80999	0.10498	0.10498	9	0	10	YMR027W	0.65918522	10.6591852	YMR027W	YMR027W	2.36072447	0.00000022	1547.125	I	I
YMR032W	0.20186	1.88878	0.10687	0.10687	67	12	22	YMR032W	-0.471914231	9.52808577	YMR032W	CYK2	2.32181788	0.0000589	603.48	I	I
YMR034C	0.13796	1.88703	0.07311	0.07311	3	0	10	YMR034C	-0.341402756	9.65859725	YMR034C	YMR034C	2.68841187	0	1379	I	I
YMR039C	0.09799	2.11037	0.04643	0.04643	49	11	21	YMR039C	0.13133881	10.1313388	YMR039C	YMR039C	2.29582425	0.0000294	1718.75	I	I
YMR043W	0.08066	1.66212	0.04853	0.04853	1210	1057	6.45685151	YMR043W	-0.959157071	9.04084293	YMR043W	FUN80	2.30924032	0.000622	308.089286	I	I
YMR044W	0.3122	2.08219	0.14994	0.14994	25	12	22	YMR044W	-0.454512701	9.5454873	YMR044W	IOC4	2.29263793	0.0000499	833.578947	I	I
YMR047C	0.31243	1.96971	0.15862	0.15862	130	18	-0.339537056	YMR047C	-0.698134121	9.30186588	YMR047C	NUP116	2.34848231	0.000179	302.852941	I	I
YMR048W	0.4785	2.01139	0.23789	0.23789	30	7	17	YMR048W	-0.428410406	9.57158959	YMR048W	YMR048W	2.38302868	0.0000146	1124.11111	I	I
YMR055C	0.0475	1.72004	0.02762	0.02762	11	0	10	YMR055C	-1.02006243	8.97993757	YMR055C	YMR055C	2.36575549	0.0000439	306.8125	I	I
YMR060C	0.34137	2.01481	0.16943	0.16943	12	0	10	YMR060C	-0.379106071	9.62089393	YMR060C	TOM37	2.3471407	0.000481	807.2	I	I
YMR086W	0.55607	1.98639	0.27994	0.27994	30	1	11	YMR086W	-0.518318311	9.48168169	YMR086W	SEG1	2.51366762	0.00000031	923.833333	I	I
YMR092C	0.16938	1.84574	0.09177	0.09177	13	6	16	YMR092C	0.2995536	10.2995536	YMR092C	YMR092C	2.36458159	0.00000604	1064.16667	I	I
YMR093W	0.05174	1.72286	0.03003	0.03003	60	1	11	YMR093W	-0.167387455	9.83261255	YMR093W	UTP15	2.33338923	0.0000481	312.382979	I	I
YMR098C	0.47741	1.95455	0.24426	0.24426	3	0	10	YMR098C	-0.608226216	9.39177378	YMR098C	YMR098C	2.31712225	0.00001	952.928571	I	I
YMR099C	0.09827	1.77002	0.05552	0.05552	17	0	10	YMR099C	1.1957324	11.1957324	YMR099C	YMR099C	2.33875566	0.0000143	846.9375	I	I
YMR100W	0.18824	2.1372	0.08808	0.08808	11	2	12	YMR100W	-0.483515251	9.51648475	YMR100W	MUB1	2.46235117	0.00000005	998.5	I	I
YMR101C	0.17032	2.13612	0.07973	0.07973	2	0	10	YMR101C	-0.608226216	9.39177378	YMR101C	YMR101C	2.44541338	0	2318	I	I
YMR104C	0.04711	1.81819	0.02591	0.02591	90	24	34	YMR104C	-0.515418056	9.48458194	YMR104C	YMR104C	2.34915311	0.0000487	1056.90909	I	I
YMR106C	0.25487	1.96896	0.12944	0.12944	88	5	15	YMR106C	-0.471914231	9.52808577	YMR106C	YMR106C	2.36994801	0.0000176	1010.33333	I	I
YMR108W	0.06501	1.55037	0.04193	0.04193	25	0	10	YMR108W	1.17253036	11.1725304	YMR108W	YMR108W	2.30907261	0.0000216	420.520833	I	I
YMR113W	0.20531	1.90882	0.10756	0.10756	3	1	11	YMR113W	-0.518318311	9.48168169	YMR113W	FOL3	2.37665605	0.0000008	1273.11111	I	I
YMR126C	0.1324	1.7281	0.07661	0.07661	0	0	10	YMR126C	-0.527019076	9.47298092	YMR126C	DLT1	2.36474929	0.0000159	1654	I	I
YMR138W	0.25673	1.60542	0.15992	0.15992	19	12	22	YMR138W	-0.764839986	9.23516001	YMR138W	CIN4	2.50176086	0.00000035	1200	I	I
YMR145C	0.09608	1.51345	0.06348	0.06348	37	5	15	YMR145C	1.01591659	11.0159166	YMR145C	YMR145C	2.32282408	0.0000405	1301	I	I
YMR149W	0.29593	1.34144	0.2206	0.2206	96	7	17	YMR149W	0.517072725	10.5170727	YMR149W	SWP1	2.46017105	0.0000148	1202.4	I	I
YMR153W	0.3862	1.76793	0.21845	0.21845	59	12	22	YMR153W	-0.561822136	9.43817786	YMR153W	NUP53	2.35183632	0.000101	520.217391	I	I
YMR154C	0.43612	1.91437	0.22781	0.22781	11	0	10	YMR154C	-0.558921881	9.44107812	YMR154C	YMR154C	2.4078484	0	2304.5	I	I
YMR157C	0.36061	1.81254	0.19895	0.19895	4	0	10	YMR157C	-0.18768924	9.81231076	YMR157C	FMP39	2.54284756	0	1650	I	I
YMR180C	0.64958	2.1923	0.2963	0.2963	5	1	11	YMR180C	-0.350103521	9.64989648	YMR180C	YMR180C	2.46033876	0	2406	I	I
YMR181C	0.16444	1.2696	0.12952	0.12952	18	20	30	YMR181C	0.11973779	10.1197378	YMR181C	YMR181C	2.4284756	0.00000405	1114.5	I	I
YMR182C	0.23638	1.29894	0.18198	0.18198	14	7	17	YMR182C	-0.515418056	9.48458194	YMR182C	YMR182C	2.36307228	0.00000816	1364	I	I
YMR188C	0.15977	1.98928	0.08032	0.08032	41	10	20	YMR188C	-0.460313211	9.53968679	YMR188C	YMR188C	2.41556264	0.0000291	556.5	I	I
YMR189W	0.11762	1.88556	0.06238	0.06238	3	0	10	YMR189W	0.464868135	10.4648681	YMR189W	GCV2	2.37414053	0.00000275	1447.71429	I	I
YMR192W	0.44949	1.8837	0.23862	0.23862	46	33	43	YMR192W	-0.332701991	9.66729801	YMR192W	YMR192W	2.31427134	0.000039	592.461539	I	I
YMR193W	0.18327	2.13871	0.08569	0.08569	27	0	10	YMR193W	0.03853065	10.0385307	YMR193W	YMR193W	2.40164347	0.00000498	749	I	I
YMR198W	0.34814	1.81414	0.1919	0.1919	35	16	26	YMR198W	-0.503817036	9.49618296	YMR198W	CIK1	2.36307228	0.00000498	1537.14286	I	I
YMR200W	0.15559	1.46438	0.10625	0.10625	13	1	11	YMR200W	0.13133881	10.1313388	YMR200W	YMR200W	2.32315948	0.00000041	1326.18182	I	I
YMR204C	0.36366	2.16683	0.16783	0.16783	11	4	14	YMR204C	-0.924354011	9.07564599	YMR204C	YMR204C	2.78433674	0	2030	I	I
YMR205C	0.02656	1.02312	0.02596	0.02596	100	6	-0.418032401	YMR205C	3.4898341	13.4898341	YMR205C	YMR205C	2.33221533	0.0000605	280.72	I	I
YMR206W	0.29124	1.76985	0.16456	0.16456	2	2	12	YMR206W	-0.962057326	9.03794267	YMR206W	YMR206W	2.78433674	0	2030	I	I
YMR232W	0.23849	2.07716	0.11481	0.11481	12	3	13	YMR232W	-0.364604796	9.63539521	YMR232W	YMR232W	2.41019621	0	2892.66667	I	I
YMR234W	0.30774	2.14541	0.14344	0.14344	4	0	10	YMR234W	-0.411008876	9.58899112	YMR234W	RNH1	2.40466208	0.00000243	901.25	I	I
YMR237W	0.0973	1.67413	0.05812	0.05812	27	1	11	YMR237W	-0.00787343	9.99212657	YMR237W	YMR237W	2.30269998	0.0000318	484.804878	I	I
YMR240C	0.45232	2.26494	0.19971	0.19971	41	5	15	YMR240C	-0.579223666	9.42077633	YMR240C	YMR240C	2.34881771	0.0001	347.090909	I	I
YMR247C	0.33894	2.00606	0.16896	0.16896	3	2	12	YMR247C	-0.06007802	9.93992198	YMR247C	YMR247C	2.35804125	0.00000988	1379.875	I	I
YMR250W	0.13229	2.14124	0.06178	0.06178	9	0	10	YMR250W	0.070433455	10.0704335	YMR250W	YMR250W	2.63592152	0.00000008	1410	I	I
YMR251W	0.33999	2.07894	0.16354	0.16354	4	2	12	YMR251W	-0.892451206	9.10754879	YMR251W	GTO3	2.49253731	0.00000019	1092	I	I
YMR255W	0.44061	2.12648	0.2072	0.2072	59	97	107	YMR255W	-0.120983375	9.87901663	YMR255W	YMR255W	2.39527084	0.00000554	1198.66667	I	I
YMR256C	0.01654	1.57728	0.01048	0.01048	9	1	11	YMR256C	0.296653345	10.2966534	YMR256C	YMR256C	2.43987926	0.00000921	2084.33333	I	I
YMR257C	0.31193	1.92891	0.16171	0.16171	7	2	12	YMR257C	-0.405208366	9.59479163	YMR257C	PET111	2.30337079	0.00000787	1268.08333	I	I
YMR259C	0.33903	1.874	0.18092	0.18092	13	1	11	YMR259C	-0.28629791	9.71370209	YMR259C	YMR259C	2.32014087	0.00000157	1247.09091	I	I
YMR260C	0.01693	1.1492	0.01473	0.01473	17	5	15	YMR260C	2.68066296	12.680663	YMR260C	TIF11	2.48566158	0.00000622	1270.33333	I	I
YMR262W	0.30044	1.47967	0.20304	0.20304	6	1	11	YMR262W	-0.799643046	9.20035695	YMR262W	YMR262W	2.42260607	0.00000254	748.111111	I	I
YMR263W	0.15708	1.65067	0.09516	0.09516	28	12	22	YMR263W	-0.930154521	9.06984548	YMR263W	YMR263W	2.27855106	0.0000898	720.473684	I	I
YMR266W	0.21942	2.04906	0.10708	0.10708	6	2	12	YMR266W	0.32275564	10.3227556	YMR266W	RSN1	2.46738219	0	2760.5	I	I
YMR277W	0.08815	1.64871	0.05347	0.05347	30	10	20	YMR277W	-0.18188873	9.81811127	YMR277W	YMR277W	2.36139527	0.0000166	598.846154	I	I
YMR282C	0.38667	1.94784	0.19851	0.19851	5	1	11	YMR282C	-0.666231316	9.33376868	YMR282C	ATP13	2.32332718	0.0000047	1256.58333	I	I
YMR283C	0.23944	1.92083	0.12466	0.12466	0	0	10	YMR283C	-0.544420606	9.45557939	YMR283C	RIT1	2.4293141	0.00000009	1488.4	I	I
YMR286W	0.15221	1.6677	0.09127	0.09127	3	0	10	YMR286W	-0.869249166	9.13075083	YMR286W	YMR286W	2.54653698	0.00000047	1608	I	I
YMR287C	0.2643	2.11014	0.12525	0.12525	9	0	10	YMR287C	-0.677832336	9.32216766	YMR287C	MSU1	2.41925205	0.0000063	1037	I	I
YMR288W	0.15362	1.84314	0.08335	0.08335	56	3	13	YMR288W	-0.431310661	9.56868934	YMR288W	HSH155	2.27720946	0.00023	448.051282	I	I
YMR290C	0.05594	1.46869	0.03809	0.03809	219	52	-0.117133581	YMR290C	0.88540511	10.8854051	YMR290C	YMR290C	2.29029012	0.000516	230.413333	I	I
YMR296C	0.11628	1.83042	0.06353	0.06353	16	1	11	YMR296C	0.174842635	10.1748426	YMR296C	LCB1	2.35015932	0.000218	781.333333	I	I
YMR297W	0.04971	1.75914	0.02826	0.02826	35	2	12	YMR297W	1.31464285	11.3146429	YMR297W	PRC1	2.34194198	0.0001	625.578947	I	I
YMR300C	0.02526	1.59392	0.01585	0.01585	12	0	10	YMR300C	0.847701795	10.8477018	YMR300C	YMR300C	2.37414053	0.000044	340.805556	I	I
YMR301C	0.1181	1.82881	0.06458	0.06458	6	2	12	YMR301C	-0.544420606	9.45557939	YMR301C	YMR301C	2.3261781	0.0000202	641.785714	I	I
YMR302C	0.08384	1.81734	0.04613	0.04613	5	1	11	YMR302C	0.10813677	10.1081368	YMR302C	RNA12	2.36894181	0.0000265	348.692308	I	I
YMR306W	0.08656	1.77057	0.04889	0.04889	69	1	11	YMR306W	-0.524118821	9.47588118	YMR306W	FKS3	2.3478115	0.0000142	1528.5	I	I
YMR308C	0.04425	1.67702	0.02639	0.02639	112	8	-0.404949843	YMR308C	0.4155638	10.4155638	YMR308C	KAP121	2.28173738	0.000198	261.636364	I	I
YMR309C	0.05495	1.28552	0.04275	0.04275	91	10	20	YMR309C	1.90629487	11.9062949	YMR309C	NIP1	2.29112863	0.0000735	245.072464	I	I
YMR310C	0.21162	1.67048	0.12668	0.12668	7	0	10	YMR310C	-0.709735141	9.29026486	YMR310C	YMR310C	2.29632735	0.0000777	555.64	I	I
YMR311C	0.16162	2.30187	0.07021	0.07021	28	22	32	YMR311C	-0.950456306	9.04954369	YMR311C	YMR311C	2.5108167	0.0000289	1199	I	I
YMR312W	0.26967	1.64314	0.16412	0.16412	12	9	19	YMR312W	0.31115462	10.3111546	YMR312W	YMR312W	2.3670971	0.00000233	929.9	I	I
YMR313C	0.08002	1.88315	0.0425	0.0425	8	1	11	YMR313C	-0.567622646	9.43237735	YMR313C	YMR313C	2.44155626	0	3119.5	I	I
YNL003C	0.09479	1.65324	0.05734	0.05734	6	0	10	YNL003C	-0.590824686	9.40917531	YNL003C	PET8	2.38286098	0.0000132	930.571429	I	I
YNL009W	0.14572	1.87291	0.0778	0.0778	37	3	13	YNL009W	-0.367505051	9.63249495	YNL009W	IDP3	2.27670636	0.0000372	693.851852	I	I
YNL010W	0.0508	1.30437	0.03895	0.03895	9	3	13	YNL010W	2.57335352	12.5733535	YNL010W	YNL010W	2.36860641	0.0000144	1580.28571	I	I
YNL011C	0.10397	1.90793	0.05449	0.05449	0	0	10	YNL011C	-0.294998676	9.70500133	YNL011C	YNL011C	2.41019621	0	2892.66667	I	I
YNL014W	0.068	1.91361	0.03554	0.03554	156	15	-0.359160892	YNL014W	0.232847735	10.2328477	YNL014W	YNL014W	2.44742579	0.0000025	510	I	I
YNL022C	0.11877	1.78463	0.06655	0.06655	16	4	14	YNL022C	-0.1644872	9.8355128	YNL022C	YNL022C	2.62820728	0	869.25	I	I
YNL023C	0.24185	1.9704	0.12274	0.12274	22	0	10	YNL023C	-0.419709641	9.58029036	YNL023C	YNL023C	2.31527754	0.0000727	603	I	I
YNL025C	0.05979	1.69955	0.03518	0.03518	48	3	13	YNL025C	-0.332701991	9.66729801	YNL025C	UME3	2.30488009	0.0000431	700.65	I	I
YNL026W	0.15919	1.77558	0.08965	0.08965	8	0	10	YNL026W	-0.474814486	9.52518551	YNL026W	YNL026W	2.31477444	0.000259	773.8125	I	I
YNL039W	0.20241	2.34465	0.08633	0.08633	15	8	18	YNL039W	-0.402308111	9.59769189	YNL039W	YNL039W	2.32181788	0.00000226	1060.85714	I	I
YNL046W	0.58132	1.50777	0.38555	0.38555	1	0	10	YNL046W	-1.22308028	8.77691972	YNL046W	YNL046W	2.41086701	0.00000005	2101.5	I	I
YNL047C	0.22096	1.87718	0.11771	0.11771	78	26	36	YNL047C	-0.619827236	9.38017276	YNL047C	SLM2	2.4081838	0.00000356	1199	I	I
YNL048W	0.20554	1.80001	0.11419	0.11419	15	0	10	YNL048W	-0.120983375	9.87901663	YNL048W	YNL048W	2.33020292	0.0000112	1260.22222	I	I
YNL051W	0.26247	2.0986	0.12507	0.12507	15	2	12	YNL051W	-0.184788985	9.81521102	YNL051W	COD4	2.32869361	0.0000433	980.615385	I	I
YNL053W	0.24538	1.41593	0.1733	0.1733	16	4	14	YNL053W	-0.695233866	9.30476613	YNL053W	MSG5	2.34831461	0.0000198	1881.2	I	I
YNL059C	0.10694	2.19865	0.04864	0.04864	37	8	18	YNL059C	-0.07167904	9.92832096	YNL059C	ARP5	2.31477444	0.000028	490.657143	I	I
YNL061W	0.05439	1.59513	0.0341	0.0341	129	17	-0.346078335	YNL061W	1.32914413	11.3291441	YNL061W	NOP2	2.3270166	0.0000511	277.859649	I	I
YNL062C	0.14891	1.99223	0.07474	0.07474	5	0	10	YNL062C	-0.080379805	9.9196202	YNL062C	GCD10	2.33657555	0.000018	1449.66667	I	I
YNL071W	0.12372	1.48073	0.08355	0.08355	12	0	10	YNL071W	0.946310465	10.9463105	YNL071W	PDA2	2.33942646	0.0000357	506.535714	I	I
YNL073W	0.27258	2.05254	0.1328	0.1328	29	5	15	YNL073W	-0.480614996	9.519385	YNL073W	MSK1	2.39761865	0.0000302	1821.8	I	I
YNL075W	0.03166	1.36899	0.02313	0.02313	46	4	14	YNL075W	-0.097781335	9.90221867	YNL075W	IMP4	2.36978031	0.000225	300.125	I	I
YNL076W	0.22647	1.81375	0.12486	0.12486	24	10	20	YNL076W	-0.753238966	9.24676103	YNL076W	YNL076W	2.34496059	0.00000341	803.4	I	I
YNL078W	0.44341	2.10943	0.21021	0.21021	40	5	15	YNL078W	-0.819944831	9.18005517	YNL078W	JIP1	2.39711555	0.0000108	777.833333	I	I
YNL080C	0.16496	1.46546	0.11257	0.11257	3	0	10	YNL080C	-0.434210916	9.56578908	YNL080C	YNL080C	2.60774778	0	1520	I	I
YNL082W	0.28804	2.33882	0.12316	0.12316	8	0	10	YNL082W	-0.416809386	9.58319061	YNL082W	YNL082W	2.33556934	0.0000295	1311.625	I	I
YNL085W	0.12199	1.70832	0.07141	0.07141	50	6	16	YNL085W	0.482269665	10.4822697	YNL085W	YNL085W	2.35988596	0.0000311	505	I	I
YNL086W	0.22463	1.86435	0.12049	0.12049	27	10	20	YNL086W	-1.01426192	8.98573808	YNL086W	SNN1	2.45564313	0.000265	762.625	I	I
YNL087W	0.20943	1.90219	0.1101	0.1101	29	0	10	YNL087W	-0.00787343	9.99212657	YNL087W	YNL087W	2.69713232	0	1090.66667	I	I
YNL088W	0.1623	2.10355	0.07715	0.07715	66	9	19	YNL088W	0.209645695	10.2096457	YNL088W	YNL088W	2.30119068	0.0000378	468.710526	I	I
YNL091W	0.26569	2.17384	0.12222	0.12222	39	6	16	YNL091W	-0.442911681	9.55708832	YNL091W	NST1	2.38286098	0.00000072	1529.16667	I	I
YNL092W	0.26881	1.83183	0.14674	0.14674	10	0	10	YNL092W	-0.614026726	9.38597327	YNL092W	YNL092W	2.48599698	0.00000441	916.25	I	I
YNL093W	0.29726	2.19833	0.13522	0.13522	95	30	40	YNL093W	-0.442911681	9.55708832	YNL093W	YPT53	2.32869361	0.0000397	704.882353	I	I
YNL094W	0.19349	1.91999	0.10078	0.10078	38	4	14	YNL094W	-0.21089128	9.78910872	YNL094W	YNL094W	2.40348818	0.0000153	487.071429	I	I
YNL098C	0.20743	1.72326	0.12037	0.12037	35	18	28	YNL098C	-0.00787343	9.99212657	YNL098C	YNL098C	2.35451954	0.000353	1307	I	I
YNL101W	0.10413	1.88502	0.05524	0.05524	46	6	16	YNL101W	-0.541520351	9.45847965	YNL101W	YNL101W	2.40935771	0	2178.25	I	I
YNL103W	0.35674	2.50822	0.14223	0.14223	36	12	22	YNL103W	-0.437111171	9.56288883	YNL103W	YNL103W	2.35502264	0.000121	1040.90909	I	I
YNL113W	0.10601	1.89927	0.05582	0.05582	86	31	41	YNL113W	0.64178369	10.6417837	YNL113W	YNL113W	2.3474761	0.0000286	537.714286	I	I
YNL118C	0.34427	2.05537	0.1675	0.1675	63	9	19	YNL118C	-0.167387455	9.83261255	YNL118C	YNL118C	2.3669294	0.00000259	664	I	I
YNL127W	0.18876	1.97268	0.09569	0.09569	36	3	13	YNL127W	-0.428410406	9.57158959	YNL127W	YNL127W	2.30119068	0.0000568	517.565217	I	I
YNL129W	0.18259	2.00841	0.09091	0.09091	0	8	18	YNL129W	-0.338502501	9.6614975	YNL129W	YNL129W	2.46738219	0	2760.5	I	I
YNL137C	0.1686	1.87725	0.08981	0.08981	27	1	11	YNL137C	-0.080379805	9.9196202	YNL137C	MNA6	2.31393594	0.0000521	412.121951	I	I
YNL152W	0.18967	2.01866	0.09396	0.09396	9	3	13	YNL152W	-0.451612446	9.54838755	YNL152W	YNL152W	2.3670971	0.0000158	551	I	I
YNL155W	0.32564	2.342	0.13904	0.13904	17	7	17	YNL155W	-0.207991025	9.79200898	YNL155W	CUZ1	2.39879255	0.0000003	1200.5	I	I
YNL156C	0.13577	1.60508	0.08459	0.08459	6	3	13	YNL156C	-0.062978275	9.93702173	YNL156C	YNL156C	2.35669965	0.00000077	1051.16667	I	I
YNL157W	0.12553	1.89936	0.06609	0.06609	43	4	14	YNL157W	-0.637228766	9.36277123	YNL157W	YNL157W	2.37061882	0.00000006	1732.14286	I	I
YNL158W	0.51393	1.76927	0.29047	0.29047	1	0	10	YNL158W	-0.692333611	9.30766639	YNL158W	YNL158W	2.45681704	0.000361	559.5	I	I
YNL163C	0.13779	1.9215	0.07171	0.07171	12	3	13	YNL163C	-0.033975725	9.96602428	YNL163C	RIA1	2.3258427	0.0000454	1536	I	I
YNL167C	0.30025	2.08197	0.14421	0.14421	32	7	17	YNL167C	-0.761939731	9.23806027	YNL167C	YNL167C	2.46386047	0	2020.33333	I	I
YNL168C	0.15196	1.96414	0.07737	0.07737	4	0	10	YNL168C	-0.02527496	9.97472504	YNL168C	FMP41	2.34546369	0.0000427	719.823529	I	I
YNL169C	0.09235	1.80426	0.05118	0.05118	5	1	11	YNL169C	-0.324001226	9.67599878	YNL169C	PSD1	2.60355526	0.00000425	777.25	I	I
YNL173C	0.53815	2.03831	0.26402	0.26402	10	8	18	YNL173C	-0.373305561	9.62669444	YNL173C	MDG1	2.36206607	0.000019	1101	I	I
YNL175C	0.15373	1.79472	0.08566	0.08566	86	8	18	YNL175C	0.702689045	10.7026891	YNL175C	NOP13	2.32215328	0.0000614	253.507246	I	I
YNL176C	0.67932	1.79604	0.37823	0.37823	10	15	25	YNL176C	-0.866348911	9.13365109	YNL176C	YNL176C	2.36575549	0.0000181	1811.83333	I	I
YNL177C	0.19807	2.2263	0.08897	0.08897	17	3	13	YNL177C	-0.706834886	9.29316511	YNL177C	YNL177C	2.31712225	0.000134	353.707317	I	I
YNL180C	0.22111	1.50818	0.14661	0.14661	19	24	34	YNL180C	-0.353003776	9.64699623	YNL180C	RHO5	2.38084857	0	2302.8	I	I
YNL182C	0.2149	1.92434	0.11168	0.11168	56	6	16	YNL182C	-0.17028771	9.82971229	YNL182C	IPI3	2.38520879	0.000184	323.37037	I	I
YNL183C	0.09024	1.91813	0.04705	0.04705	79	15	25	YNL183C	-0.338502501	9.6614975	YNL183C	YNL183C	2.34932081	0.0000099	391.25	I	I
YNL186W	0.28685	1.94363	0.14759	0.14759	194	34	-0.234876597	YNL186W	0.221246715	10.2212467	YNL186W	YNL186W	2.25624686	0.0000594	664.482759	I	I
YNL193W	0.30821	1.86397	0.16535	0.16535	4	3	13	YNL193W	-0.05427751	9.94572249	YNL193W	YNL193W	2.3872212	0.00000071	912.769231	I	I
YNL199C	0.12728	1.90202	0.06692	0.06692	28	15	25	YNL199C	-0.921453756	9.07854624	YNL199C	YNL199C	2.45480463	0.00000656	873.857143	I	I
YNL201C	0.14902	1.98921	0.07491	0.07491	37	1	11	YNL201C	-0.379106071	9.62089393	YNL201C	PSY2	2.30102298	0.000035	609.9	I	I
YNL206C	0.23932	2.30425	0.10386	0.10386	49	9	19	YNL206C	-0.1064821	9.8935179	YNL206C	RTT106	2.33925876	0.0000297	288.961539	I	I
YNL212W	0.13996	2.09919	0.06667	0.06667	14	5	15	YNL212W	0.082034475	10.0820345	YNL212W	YNL212W	2.31292973	0.0000492	506.322581	I	I
YNL217W	0.23738	1.87627	0.12651	0.12651	13	2	12	YNL217W	-0.329801736	9.67019827	YNL217W	YNL217W	2.50863659	0.0000104	1771.5	I	I
YNL219C	0.11367	1.66744	0.06817	0.06817	4	3	13	YNL219C	0.15454085	10.1545409	YNL219C	ALG9	2.3670971	0.000143	725.8	I	I
YNL220W	0.03259	1.37405	0.02372	0.02372	20	2	12	YNL220W	1.89469385	11.8946939	YNL220W	ADE12	2.37363743	0.0000103	663.857143	I	I
YNL223W	0.2116	1.87607	0.11279	0.11279	3	0	10	YNL223W	-0.831545851	9.16845415	YNL223W	YNL223W	2.32936441	0.00000393	1605.5	I	I
YNL224C	0.35007	2.63707	0.13275	0.13275	13	5	15	YNL224C	-0.225392555	9.77460745	YNL224C	SQS1	2.29012242	0.000224	386.5	I	I
YNL225C	0.31217	2.56939	0.1215	0.1215	61	9	19	YNL225C	-0.361704541	9.63829546	YNL225C	CNM67	2.35083012	0.0000606	472.291667	I	I
YNL230C	0.29344	1.56951	0.18697	0.18697	29	1	11	YNL230C	-0.634328511	9.36567149	YNL230C	YNL230C	2.36340768	0.0000139	944.3	I	I
YNL231C	0.09602	1.70049	0.05647	0.05647	10	2	12	YNL231C	0.51997298	10.519973	YNL231C	YNL231C	2.63491531	0.00000086	861	I	I
YNL232W	0.17634	1.85964	0.09483	0.09483	19	1	11	YNL232W	-0.611126471	9.38887353	YNL232W	SKI4	2.32064397	0.000141	288.322581	I	I
YNL233W	0.40254	2.26153	0.17799	0.17799	22	6	16	YNL233W	-0.376205816	9.62379419	YNL233W	YNL233W	2.34496059	0.0000145	975.454546	I	I
YNL234W	0.41472	2.38686	0.17375	0.17375	5	1	11	YNL234W	-0.477714741	9.52228526	YNL234W	YNL234W	2.31695455	0.00000471	1227.72727	I	I
YNL242W	0.26083	2.01556	0.12941	0.12941	6	0	10	YNL242W	-0.637228766	9.36277123	YNL242W	ATG2	2.32902901	0.0000248	837.857143	I	I
YNL244C	0.01236	0.82882	0.01492	0.01492	58	0	10	YNL244C	0.58377859	10.5837786	YNL244C	YNL244C	2.38336408	0.00000119	1086.22222	I	I
YNL245C	0.29185	1.88127	0.15514	0.15514	31	9	19	YNL245C	-0.756139221	9.24386078	YNL245C	CWC25	2.39661244	0.000109	218.837838	I	I
YNL252C	0.24308	1.81373	0.13402	0.13402	28	0	10	YNL252C	-0.315300461	9.68469954	YNL252C	YNL252C	2.41170552	0.00000735	493.384615	I	I
YNL255C	0.04461	1.12253	0.03974	0.03974	1217	222	0.994883798	YNL255C	2.95618718	12.9561872	YNL255C	GIS2	2.31292973	0.00000577	693.304348	I	I
YNL256W	0.21053	1.91025	0.11021	0.11021	4	0	10	YNL256W	-0.08328006	9.91671994	YNL256W	YNL256W	2.28307899	0.0000458	1016.875	I	I
YNL261W	0.13488	1.85629	0.07266	0.07266	25	1	11	YNL261W	-0.236993575	9.76300643	YNL261W	ORC5	2.32936441	0.0000247	598.08	I	I
YNL267W	0.12733	2.0271	0.06281	0.06281	18	4	14	YNL267W	-0.22829281	9.77170719	YNL267W	YNL267W	2.44155626	0.0000138	1176.75	I	I
YNL272C	0.28079	1.88857	0.14868	0.14868	113	18	-0.339537056	YNL272C	-0.25729536	9.74270464	YNL272C	YNL272C	2.3468053	0.00000413	478.833333	I	I
YNL277W	0.09174	1.89646	0.04837	0.04837	6	0	10	YNL277W	-0.12388363	9.87611637	YNL277W	MET2	2.38369948	0	2249.6	I	I
YNL278W	0.33088	1.90357	0.17382	0.17382	15	1	11	YNL278W	-0.486415506	9.51358449	YNL278W	YNL278W	2.43166192	0.0000133	1459.6	I	I
YNL281W	0.11044	0.93781	0.11776	0.11776	31	12	22	YNL281W	0.4155638	10.4155638	YNL281W	HCH1	2.29129633	0.0000638	383.745098	I	I
YNL287W	0.0524	1.35078	0.03879	0.03879	50	0	10	YNL287W	1.01591659	11.0159166	YNL287W	SEC21	2.33909106	0.0000704	296.658537	I	I
YNL290W	0.08348	1.8263	0.04571	0.04571	43	7	17	YNL290W	-0.703934631	9.29606537	YNL290W	RFC3	2.34177427	0.0000643	486.058824	I	I
YNL293W	0.13189	1.75744	0.07505	0.07505	46	4	14	YNL293W	-0.503817036	9.49618296	YNL293W	MSB3	2.39912796	0.00000003	1912.2	I	I
YNL295W	0.26148	2.00249	0.13058	0.13058	5	1	11	YNL295W	-0.819944831	9.18005517	YNL295W	MRX6	2.39577394	0	2025	I	I
YNL298W	0.12725	1.76926	0.07192	0.07192	141	14	-0.365702171	YNL298W	-0.335602246	9.66439776	YNL298W	CLA4	2.28190508	0.000127	493.675676	I	I
YNL304W	0.17879	1.7281	0.10346	0.10346	21	11	21	YNL304W	-0.915653246	9.08434675	YNL304W	YPT11	2.38319638	0.00000037	1311.71429	I	I
YNL308C	0.18659	2.83968	0.06571	0.06571	112	27	-0.280665548	YNL308C	0.453267115	10.4532671	YNL308C	YNL308C	2.31007882	0.0000439	376.355556	I	I
YNL311C	0.18838	1.91449	0.09839	0.09839	19	1	11	YNL311C	-0.260195615	9.73980439	YNL311C	YNL311C	2.37162502	0.0000201	964	I	I
YNL313C	0.1797	1.92418	0.09339	0.09339	25	1	11	YNL313C	0.00372759	10.0037276	YNL313C	EMW1	2.31443904	0.000813	347.909091	I	I
YNL315C	0.22888	1.9527	0.11721	0.11721	13	0	10	YNL315C	-0.033975725	9.96602428	YNL315C	ATP11	2.346973	0.0000527	753.466667	I	I
YNL316C	0.28914	1.7677	0.16357	0.16357	3	0	10	YNL316C	-0.411008876	9.58899112	YNL316C	YNL316C	2.54687238	0.0000024	1208.25	I	I
YNL320W	0.09801	1.57953	0.06205	0.06205	0	0	10	YNL320W	-0.477714741	9.52228526	YNL320W	YNL320W	2.30370619	0.0000248	1589.44444	I	I
YNL326C	0.17547	1.59482	0.11002	0.11002	4	0	10	YNL326C	-0.582123921	9.41787608	YNL326C	YNL326C	2.35552574	0	2072.6	I	I
YNL330C	0.02497	1.49252	0.01673	0.01673	60	8	18	YNL330C	-0.24569434	9.75430566	YNL330C	YNL330C	2.2248868	0.000227	313.870968	I	I
YNR003C	0.05769	1.53334	0.03762	0.03762	35	1	11	YNR003C	-0.18768924	9.81231076	YNR003C	YNR003C	2.27821566	0.000345	470.404762	I	I
YNR004W	0.30354	1.88229	0.16126	0.16126	3	2	12	YNR004W	-0.22829281	9.77170719	YNR004W	YNR004W	2.3676002	0.0000393	1519	I	I
YNR007C	0.13029	1.78277	0.07308	0.07308	17	5	15	YNR007C	-0.393607346	9.60639265	YNR007C	ATG3	2.3877243	0.000031	778.714286	I	I
YNR008W	0.1073	1.74468	0.0615	0.0615	1	0	10	YNR008W	-0.294998676	9.70500133	YNR008W	YNR008W	2.41992286	0.00000697	1767.75	I	I
YNR009W	0.28178	1.37557	0.20485	0.20485	11	1	11	YNR009W	-0.576323411	9.42367659	YNR009W	YNR009W	2.45128291	0.0000008	1225.5	I	I
YNR010W	0.22512	1.99071	0.11308	0.11308	41	21	31	YNR010W	-0.454512701	9.5454873	YNR010W	CSE2	2.39141372	0.0000372	576.666667	I	I
YNR015W	0.18407	1.83553	0.10028	0.10028	0	0	10	YNR015W	-0.321100971	9.67889903	YNR015W	DUS2	2.3670971	0.000293	1548.71429	I	I
YNR030W	0.19129	1.86883	0.10236	0.10236	10	2	12	YNR030W	0.61858165	10.6185817	YNR030W	YNR030W	2.37229582	0.000058	494.2	I	I
YNR032C-A	0.03616	1.58652	0.02279	0.02279	6	0	10	YNR032C-A	0.000827335	10.0008273	YNR032C-A	YNR032C-A	2.41841355	0.00000093	1399.8	I	I
YNR032W	0.04128	1.64588	0.02508	0.02508	215	57	-0.084427187	YNR032W	-0.254395105	9.7456049	YNR032W	YNR032W	2.36558779	0.000013	1429.57143	I	I
YNR033W	0.20127	1.92282	0.10467	0.10467	20	1	11	YNR033W	-0.373305561	9.62669444	YNR033W	ABZ1	2.36609089	0.00000457	843.769231	I	I
YNR034W	0.05963	1.64648	0.03622	0.03622	48	3	13	YNR034W	-0.207991025	9.79200898	YNR034W	SOL1	2.30488009	0.0000774	649.869565	I	I
YNR036C	0.07069	1.68445	0.04197	0.04197	14	0	10	YNR036C	-1.05776574	8.94223426	YNR036C	YNR036C	2.39241992	0.000542	268.65625	I	I
YNR038W	0.2548	1.78877	0.14244	0.14244	31	24	34	YNR038W	0.29375309	10.2937531	YNR038W	YNR038W	2.30420929	0.000158	394.042553	I	I
YNR041C	0.12256	1.53578	0.0798	0.0798	5	0	10	YNR041C	-0.660430806	9.33956919	YNR041C	COQ2	2.59751803	0.00000034	845.75	I	I
YNR049C	0.18583	1.48588	0.12506	0.12506	23	7	17	YNR049C	-1.08096778	8.91903222	YNR049C	YNR049C	2.57856783	0	1751	I	I
YNR050C	0.06235	1.29077	0.0483	0.0483	18	0	10	YNR050C	1.64237167	11.6423717	YNR050C	LYS9	2.37933926	0.00000407	856.727273	I	I
YNR051C	0.30089	2.1941	0.13714	0.13714	395	34	-0.234876597	YNR051C	0.000827335	10.0008273	YNR051C	YNR051C	2.28324669	0.000124	403.902439	I	I
YOL012C	0.00706	1.46072	0.00483	0.00483	309	22	-0.313371941	YOL012C	0.064632945	10.064633	YOL012C	HTZ1	2.28056347	0.000615	180.778689	I	I
YOL013C	0.22963	1.56537	0.1467	0.1467	78	2	12	YOL013C	-0.376205816	9.62379419	YOL013C	HRD1	2.29817206	0.000161	704.583333	I	I
YOL018C	0.16559	1.92724	0.08592	0.08592	84	11	21	YOL018C	-0.759039476	9.24096052	YOL018C	TLG2	2.32332718	0.0002	1001.66667	I	I
YOL020W	0.0959	1.72365	0.05564	0.05564	120	10	-0.391867286	YOL020W	-0.184788985	9.81521102	YOL020W	YOL020W	2.70618816	0	2439	I	I
YOL022C	0.19392	2.2084	0.08781	0.08781	1	2	12	YOL022C	0.111037025	10.111037	YOL022C	YOL022C	2.39292303	0.000722	430.375	I	I
YOL032W	0.09048	1.91741	0.04719	0.04719	2	0	10	YOL032W	-1.10416982	8.89583018	YOL032W	YOL032W	2.45648164	0.0000101	1559.5	I	I
YOL034W	0.1536	2.03666	0.07542	0.07542	38	8	18	YOL034W	-0.138384905	9.8616151	YOL034W	YOL034W	2.38889821	0.000771	267.805556	I	I
YOL036W	0.36806	1.70074	0.21641	0.21641	7	1	11	YOL036W	-0.527019076	9.47298092	YOL036W	YOL036W	2.32030857	0.00000387	1490.77778	I	I
YOL038W	0.03231	1.21077	0.02669	0.02669	73	16	26	YOL038W	0.10813677	10.1081368	YOL038W	PRE6	2.33204763	0.000118	357.81579	I	I
YOL039W	0.02962	0.37698	0.07856	0.07856	128	19	-0.332995778	YOL039W	5.73753173	15.7375317	YOL039W	RPL44	2.33355693	0.0000238	519.266667	I	I
YOL041C	0.21537	1.93448	0.11133	0.11133	97	16	26	YOL041C	0.667885985	10.667886	YOL041C	NOP12	2.37112192	0.000171	215.142857	I	I
YOL043C	0.20449	2.05024	0.09974	0.09974	21	0	10	YOL043C	-0.254395105	9.7456049	YOL043C	NTG2	2.34395439	0.0000229	1775.14286	I	I
YOL058W	0.04777	1.27941	0.03734	0.03734	9	2	12	YOL058W	3.24911294	13.2491129	YOL058W	ARG1	2.38655039	0.0000113	606.2	I	I
YOL059W	0.08056	1.12826	0.0714	0.0714	35	2	12	YOL059W	0.580878335	10.5808783	YOL059W	GPD2	2.3676002	0.00000846	830.857143	I	I
YOL060C	0.16145	1.82722	0.08836	0.08836	12	4	14	YOL060C	0.024029375	10.0240294	YOL060C	YOL060C	2.35804125	0.0000402	395.3125	I	I
YOL062C	0.09813	1.68315	0.0583	0.0583	9	4	14	YOL062C	-0.437111171	9.56288883	YOL062C	YOL062C	2.41656884	0.0000125	920.222222	I	I
YOL064C	0.09018	1.47427	0.06117	0.06117	3	2	12	YOL064C	0.60698063	10.6069806	YOL064C	MET22	2.45413383	0.00000936	1040.16667	I	I
YOL066C	0.13767	2.04327	0.06738	0.06738	6	0	10	YOL066C	-0.541520351	9.45847965	YOL066C	RIB2	2.38403488	0.0000363	1397	I	I
YOL077C	0.03531	1.26304	0.02796	0.02796	96	12	22	YOL077C	0.94921072	10.9492107	YOL077C	YOL077C	2.26144558	0.000196	222.84466	I	I
YOL080C	0.25121	1.99277	0.12606	0.12606	11	1	11	YOL080C	0.22994748	10.2299475	YOL080C	REX4	2.33020292	0.0000218	1169.54546	I	I
YOL088C	0.39795	1.79033	0.22228	0.22228	27	9	19	YOL088C	0.34015717	10.3401572	YOL088C	MPD2	2.59433171	0.00000032	816.2	I	I
YOL090W	0.08793	1.978	0.04445	0.04445	47	3	13	YOL090W	0.261850285	10.2618503	YOL090W	MSH2	2.29968137	0.0000705	480.588235	I	I
YOL093W	0.14854	2.00795	0.07397	0.07397	1	0	10	YOL093W	-0.434210916	9.56578908	YOL093W	TRM10	2.50880429	0.000631	510.428571	I	I
YOL101C	0.15088	1.63434	0.09232	0.09232	7	5	15	YOL101C	-0.503817036	9.49618296	YOL101C	YOL101C	2.39141372	0.00000003	1561	I	I
YOL112W	0.19321	2.00234	0.09649	0.09649	42	6	16	YOL112W	-0.790942281	9.20905772	YOL112W	YOL112W	2.3868858	0.00000064	1865.5	I	I
YOL116W	0.13736	1.69518	0.08103	0.08103	6	0	10	YOL116W	-0.840246616	9.15975338	YOL116W	FUP1	2.42159987	0.0000259	817.125	I	I
YOL122C	0.17745	2.12349	0.08356	0.08356	19	6	16	YOL122C	0.261850285	10.2618503	YOL122C	SMF1	2.7764548	0	1035	I	I
YOL123W	0.05292	1.50559	0.03515	0.03515	88	32	42	YOL123W	0.992714545	10.9927146	YOL123W	NAB4	2.33724635	0.000269	125.613861	I	I
YOL124C	0.08853	1.96458	0.04506	0.04506	1	0	10	YOL124C	-0.21669179	9.78330821	YOL124C	TRM11	2.3679356	0.00000089	1790.5	I	I
YOL125W	0.33742	2.26069	0.14925	0.14925	16	0	10	YOL125W	-0.440011426	9.55998857	YOL125W	YOL125W	2.37632064	0.000583	1310.83333	I	I
YOL128C	0.22124	1.4635	0.15117	0.15117	259	51	-0.123674859	YOL128C	-0.706834886	9.29316511	YOL128C	YOL128C	2.51601543	0	3491	I	I
YOL137W	0.23652	1.98794	0.11898	0.11898	10	2	12	YOL137W	-0.318200716	9.68179929	YOL137W	YOL137W	2.35619655	0.0000287	1142.42857	I	I
YOL139C	0.00644	0.64157	0.01004	0.01004	99	8	18	YOL139C	2.38193669	12.3819367	YOL139C	CDC33	2.27385544	0.000119	300.206349	I	I
YOL144W	0.31411	2.14435	0.14648	0.14648	20	26	36	YOL144W	-0.350103521	9.64989648	YOL144W	YOL144W	2.29934597	0.0000374	884	I	I
YOL145C	0.13033	2.19465	0.05938	0.05938	70	9	19	YOL145C	0.134239065	10.1342391	YOL145C	CTR9	2.29163173	0.000162	389.446809	I	I
YOL149W	0.12738	1.93921	0.06568	0.06568	44	5	15	YOL149W	-0.326901481	9.67309852	YOL149W	YOL149W	2.34797921	0.000149	684.6	I	I
YOR014W	0.11147	1.68671	0.06609	0.06609	44	3	13	YOR014W	-0.1644872	9.8355128	YOR014W	YOR014W	2.34110347	0.0000673	273.27451	I	I
YOR016C	0.0799	1.44099	0.05545	0.05545	96	9	19	YOR016C	0.38656125	10.3865613	YOR016C	ERP4	2.33892336	0.0000389	689.277778	I	I
YOR021C	0.10432	1.75175	0.05955	0.05955	8	0	10	YOR021C	0.488070175	10.4880702	YOR021C	SFM1	2.4291464	0.00000022	1388.4	I	I
YOR026W	0.25839	2.0571	0.12561	0.12561	8	0	10	YOR026W	-0.358804286	9.64119572	YOR026W	BUB3	2.41589804	0.00000329	734.2	I	I
YOR027W	0.11553	1.76809	0.06534	0.06534	59	11	21	YOR027W	1.22183469	11.2218347	YOR027W	YOR027W	2.29548885	0.00000406	898.85	I	I
YOR033C	0.25879	1.90878	0.13558	0.13558	6	0	10	YOR033C	-0.312400206	9.6875998	YOR033C	DHS1	2.3471407	0.00000032	1545.85714	I	I
YOR036W	0.12574	1.78211	0.07055	0.07055	50	6	16	YOR036W	-0.721336161	9.27866384	YOR036W	YOR036W	2.39678014	0.000014	875.125	I	I
YOR039W	0.03146	1.75014	0.01798	0.01798	100	3	-0.437656237	YOR039W	-0.21669179	9.78330821	YOR039W	CKB2	2.32768741	0.000129	300.533333	I	I
YOR051C	0.18974	1.97125	0.09625	0.09625	16	3	13	YOR051C	0.801297715	10.8012977	YOR051C	YOR051C	2.36877411	0.0000012	1408.57143	I	I
YOR052C	0.05834	1.45798	0.04001	0.04001	6	0	10	YOR052C	0.20674544	10.2067454	YOR052C	TMC1	2.30404159	0.0000302	1421.4	I	I
YOR056C	0.18404	1.70567	0.1079	0.1079	55	12	22	YOR056C	-0.11808312	9.88191688	YOR056C	NOB1	2.31192353	0.000198	358.243902	I	I
YOR057W	0.42182	2.08948	0.20188	0.20188	29	5	15	YOR057W	-0.08908057	9.91091943	YOR057W	YOR057W	2.34797921	0.0000208	1009.53846	I	I
YOR063W	0.03899	0.35729	0.10914	0.10914	169	7	-0.411491122	YOR063W	6.05946003	16.05946	YOR063W	MAK8	2.24870032	0.000297	179.141593	I	I
YOR076C	0.48687	1.95669	0.24882	0.24882	13	3	13	YOR076C	-0.358804286	9.64119572	YOR076C	SKI7	2.27217843	0.0000295	667.782609	I	I
YOR077W	0.28048	1.72077	0.163	0.163	0	7	17	YOR077W	-0.869249166	9.13075083	YOR077W	YOR077W	2.33523394	0.00000053	1157.3	I	I
YOR078W	0.40183	2.38779	0.16829	0.16829	77	31	41	YOR078W	-0.611126471	9.38887353	YOR078W	YOR078W	2.31947007	0.0000824	280.735849	I	I
YOR085W	0.12791	1.55069	0.08249	0.08249	17	6	16	YOR085W	0.505471705	10.5054717	YOR085W	YOR085W	2.43099111	0.00000016	1406.2	I	I
YOR094W	0.05412	1.72149	0.03144	0.03144	124	10	-0.391867286	YOR094W	-0.03107547	9.96892453	YOR094W	ARF3	2.39896025	0.0000144	875.777778	I	I
YOR097C	0.33716	1.97938	0.17034	0.17034	5	2	12	YOR097C	-0.860548401	9.1394516	YOR097C	YOR097C	2.44071776	0	1725.33333	I	I
YOR099W	0.19234	1.94966	0.09865	0.09865	48	5	15	YOR099W	0.86800358	10.8680036	YOR099W	YOR099W	2.39141372	0	1973	I	I
YOR100C	0.10736	1.65552	0.06485	0.06485	14	10	20	YOR100C	-0.382006326	9.61799367	YOR100C	CRC1	2.60858628	0.0000008	755	I	I
YOR107W	0.5485	2.68618	0.20419	0.20419	9	2	12	YOR107W	-0.651730041	9.34826996	YOR107W	RGS2	2.37682375	0.0000537	1628.5	I	I
YOR110W	0.24929	1.74953	0.14249	0.14249	17	0	10	YOR110W	-0.367505051	9.63249495	YOR110W	YOR110W	2.37682375	0.0000198	579.764706	I	I
YOR112W	0.31019	1.79137	0.17316	0.17316	18	2	12	YOR112W	-0.312400206	9.6875998	YOR112W	YOR112W	2.26379339	0.0000542	859.26087	I	I
YOR113W	0.25031	2.01992	0.12392	0.12392	34	12	22	YOR113W	-0.596625196	9.4033748	YOR113W	YOR113W	2.39594164	0.00000146	714.857143	I	I
YOR115C	0.14237	1.70559	0.08347	0.08347	24	6	16	YOR115C	-0.663331061	9.33666894	YOR115C	TRS33	2.3883951	0.0000212	892.7	I	I
YOR131C	0.17978	1.99015	0.09033	0.09033	1	1	11	YOR131C	-0.355904031	9.64409597	YOR131C	YOR131C	2.37984236	0.00000008	1912	I	I
YOR136W	0.04905	1.61303	0.03041	0.03041	71	13	23	YOR136W	1.26243826	11.2624383	YOR136W	IDH2	2.32165018	0.0000167	410	I	I
YOR141C	0.12969	2.26467	0.05727	0.05727	59	9	19	YOR141C	-0.14708567	9.85291433	YOR141C	YOR141C	2.31058192	0.0000149	467.526316	I	I
YOR144C	0.38006	2.09726	0.18122	0.18122	19	2	12	YOR144C	-0.329801736	9.67019827	YOR144C	ELG1	2.39896025	0.00000662	908.6	I	I
YOR150W	0.05995	2.07125	0.02895	0.02895	18	1	11	YOR150W	-0.086180315	9.91381969	YOR150W	YOR150W	2.43082341	0.00000074	600.545455	I	I
YOR152C	0.16761	1.3332	0.12572	0.12572	1	2	12	YOR152C	-0.080379805	9.9196202	YOR152C	YOR152C	2.52590978	0	1764	I	I
YOR157C	0.04459	1.3478	0.03308	0.03308	38	6	16	YOR157C	0.2415485	10.2415485	YOR157C	PUP1	2.42310917	0.00000217	798.125	I	I
YOR158W	0.19094	1.79875	0.10615	0.10615	33	9	19	YOR158W	-0.12388363	9.87611637	YOR158W	PET123	2.34127117	0.0000359	648.944444	I	I
YOR160W	0.12463	1.83806	0.0678	0.0678	19	0	10	YOR160W	-0.06007802	9.93992198	YOR160W	YOR160W	2.31695455	0.0000396	578.44	I	I
YOR164C	0.09802	1.7091	0.05735	0.05735	16	0	10	YOR164C	0.244448755	10.2444488	YOR164C	YOR164C	2.3055509	0.000093	662.761905	I	I
YOR166C	0.44789	2.01694	0.22207	0.22207	2	5	15	YOR166C	0.06173269	10.0617327	YOR166C	SWT1	2.33473084	0.00000053	1748.25	I	I
YOR171C	0.19556	1.91903	0.10191	0.10191	5	1	11	YOR171C	-0.03687598	9.96312402	YOR171C	YOR171C	2.61546202	0	1637.5	I	I
YOR174W	0.31422	2.24716	0.13983	0.13983	61	21	31	YOR174W	-0.207991025	9.79200898	YOR174W	YOR174W	2.30286768	0.0001	280.418182	I	I
YOR179C	0.48787	2.72641	0.17894	0.17894	18	18	28	YOR179C	-0.837346361	9.16265364	YOR179C	SYC1	2.30068757	0.00011	473.121212	I	I
YOR185C	0.0083	1.72305	0.00482	0.00482	107	12	-0.378784728	YOR185C	1.24793699	11.247937	YOR185C	CNR2	2.36558779	0.0000713	526.444444	I	I
YOR188W	0.33847	2.12217	0.15949	0.15949	8	2	12	YOR188W	-0.486415506	9.51358449	YOR188W	MSB1	2.33992957	0.00000975	1376.5	I	I
YOR189W	0.49042	2.24332	0.21861	0.21861	29	25	35	YOR189W	-0.738737691	9.26126231	YOR189W	YOR189W	2.4482643	0.0000132	564.5	I	I
YOR197W	0.09421	1.94369	0.04847	0.04847	31	3	13	YOR197W	-0.20509077	9.79490923	YOR197W	YOR197W	2.48817709	0.0000118	1213.66667	I	I
YOR198C	0.08607	1.41926	0.06065	0.06065	75	14	24	YOR198C	2.80247367	12.8024737	YOR198C	YOR198C	2.32517189	0.000117	347.288889	I	I
YOR205C	0.31983	2.09157	0.15291	0.15291	2	0	10	YOR205C	-0.738737691	9.26126231	YOR205C	GEP3	2.366594	0.0000479	1096.14286	I	I
YOR206W	0.10475	1.62515	0.06445	0.06445	100	11	-0.385326007	YOR206W	0.934709445	10.9347095	YOR206W	NOC2	2.25557605	0.000151	306.623188	I	I
YOR214C	0.37028	1.75424	0.21108	0.21108	5	6	16	YOR214C	-0.451612446	9.54838755	YOR214C	YOR214C	2.38202247	0.00000177	1817.83333	I	I
YOR215C	0.11165	2.19533	0.05086	0.05086	14	7	17	YOR215C	0.9376097	10.9376097	YOR215C	AIM41	2.43954385	0.00000021	1432.75	I	I
YOR216C	0.30392	2.2237	0.13668	0.13668	91	54	64	YOR216C	0.151640595	10.1516406	YOR216C	RUD3	2.52272346	0.00000672	1047.4	I	I
YOR219C	0.2619	2.04156	0.12829	0.12829	3	1	11	YOR219C	-0.361704541	9.63829546	YOR219C	YOR219C	2.39309073	0.000002	2183.5	I	I
YOR220W	0.18838	1.42904	0.13183	0.13183	16	4	14	YOR220W	-0.724236416	9.27576358	YOR220W	RCN2	2.51601543	0	3491	I	I
YOR226C	0.05683	1.72491	0.03295	0.03295	17	0	10	YOR226C	-0.573423156	9.42657684	YOR226C	ISU2	2.39795405	0	1786.5	I	I
YOR227W	0.23172	2.03147	0.11407	0.11407	28	2	12	YOR227W	-0.236993575	9.76300643	YOR227W	YOR227W	2.28995472	0.0000281	1351	I	I
YOR231W	0.17202	1.79949	0.09559	0.09559	82	14	24	YOR231W	-0.840246616	9.15975338	YOR231W	MKK1	2.428811	0.00000032	1177.83333	I	I
YOR237W	0.11741	1.65362	0.071	0.071	36	3	13	YOR237W	-0.138384905	9.8616151	YOR237W	OSH5	2.38068087	0.00000245	2160.2	I	I
YOR239W	0.86787	1.59862	0.54289	0.54289	34	15	25	YOR239W	-0.480614996	9.519385	YOR239W	TRM140	2.35804125	0.000341	458.193548	I	I
YOR242C	0.28614	2.16765	0.132	0.132	0	0	10	YOR242C	-0.614026726	9.38597327	YOR242C	SSP2	2.41019621	0	2892.66667	I	I
YOR244W	0.06877	1.81188	0.03796	0.03796	143	8	-0.404949843	YOR244W	0.244448755	10.2444488	YOR244W	YOR244W	2.26144558	0.0000542	414.384615	I	I
YOR249C	0.24561	2.00862	0.12228	0.12228	20	1	11	YOR249C	-0.373305561	9.62669444	YOR249C	YOR249C	2.37296663	0.0000614	507.619048	I	I
YOR252W	0.1398	2.22213	0.06291	0.06291	8	7	17	YOR252W	0.17194238	10.1719424	YOR252W	YOR252W	2.3870535	0.00000357	722.5	I	I
YOR253W	0.22553	1.6477	0.13688	0.13688	12	0	10	YOR253W	-0.15288618	9.84711382	YOR253W	NAT5	2.3463022	0.00000058	1328	I	I
YOR258W	0.35418	2.09538	0.16903	0.16903	1	0	10	YOR258W	-0.616926981	9.38307302	YOR258W	HNT3	2.41623344	0.0000864	971.2	I	I
YOR260W	0.11234	1.50328	0.07473	0.07473	34	11	21	YOR260W	0.20094493	10.2009449	YOR260W	YOR260W	2.33439544	0.0000169	573.826087	I	I
YOR261C	0.0703	1.43202	0.04909	0.04909	63	4	14	YOR261C	0.464868135	10.4648681	YOR261C	YOR261C	2.33389234	0.0000327	398.837838	I	I
YOR262W	0.07002	2.47785	0.02826	0.02826	9	5	15	YOR262W	-0.300799186	9.69920082	YOR262W	YOR262W	2.35418414	0.0000104	890	I	I
YOR270C	0.05443	1.42541	0.03819	0.03819	73	3	13	YOR270C	1.49155841	11.4915584	YOR270C	YOR270C	2.33137682	0.000469	316.568182	I	I
YOR271C	0.03465	1.67693	0.02066	0.02066	7	0	10	YOR271C	0.227047225	10.2270472	YOR271C	YOR271C	2.41908435	0.00000356	390.090909	I	I
YOR274W	0.17119	2.22054	0.07709	0.07709	0	0	10	YOR274W	-0.120983375	9.87901663	YOR274W	YOR274W	2.33406004	0.00026	1469	I	I
YOR275C	0.30247	2.11386	0.14309	0.14309	6	5	15	YOR275C	-0.338502501	9.6614975	YOR275C	RIM20	2.41019621	0	2892.66667	I	I
YOR276W	0.08381	0.91607	0.09149	0.09149	35	5	15	YOR276W	2.04840737	12.0484074	YOR276W	CAF2	2.34412209	0.0000193	971.272727	I	I
YOR278W	0.40239	2.11352	0.19039	0.19039	0	0	10	YOR278W	-0.25149485	9.74850515	YOR278W	YOR278W	2.32819051	0.000122	1890	I	I
YOR279C	0.18504	2.20468	0.08393	0.08393	13	7	17	YOR279C	-0.556021626	9.44397837	YOR279C	RFM1	2.34496059	0.0000243	1011.7	I	I
YOR281C	0.11457	2.29895	0.04984	0.04984	17	17	27	YOR281C	-0.09488108	9.90511892	YOR281C	YOR281C	2.34328358	0.0000274	699.142857	I	I
YOR284W	0.52101	1.87003	0.27861	0.27861	19	11	21	YOR284W	-0.538620096	9.4613799	YOR284W	YOR284W	2.32248868	0.000161	619.85	I	I
YOR285W	0.26033	2.1852	0.11913	0.11913	5	1	11	YOR285W	0.11973779	10.1197378	YOR285W	YOR285W	2.43300352	0.00000042	2002.66667	I	I
YOR286W	0.14514	1.69286	0.08574	0.08574	1	0	10	YOR286W	-0.387806836	9.61219316	YOR286W	AIM42	2.36156297	0.00000018	1670.71429	I	I
YOR305W	0.22382	2.07636	0.1078	0.1078	3	0	10	YOR305W	-0.538620096	9.4613799	YOR305W	RRG7	2.78433674	0	2030	I	I
YOR308C	0.71964	2.30105	0.31274	0.31274	76	21	31	YOR308C	-0.399407856	9.60059214	YOR308C	YOR308C	2.39208452	0.0000218	392.333333	I	I
YOR311C	0.17213	1.56311	0.11012	0.11012	9	0	10	YOR311C	-0.23409332	9.76590668	YOR311C	DGK1	2.51601543	0	3491	I	I
YOR324C	0.29042	1.84105	0.15775	0.15775	67	18	28	YOR324C	-0.828645596	9.1713544	YOR324C	HPH1	2.39711555	0.000336	1518	I	I
YOR330C	0.17338	1.69492	0.10229	0.10229	8	1	11	YOR330C	-0.474814486	9.52518551	YOR330C	MIP1	2.3887305	0.000022	1176.14286	I	I
YOR334W	0.13201	1.86354	0.07084	0.07084	16	1	11	YOR334W	-0.048477	9.951523	YOR334W	MRS2	2.62887808	0	1510	I	I
YOR337W	0.14304	1.95491	0.07317	0.07317	30	9	19	YOR337W	-0.271796635	9.72820337	YOR337W	TEA1	2.47845044	0.00000009	709.5	I	I
YOR338W	0.30097	1.60968	0.18697	0.18697	7	4	14	YOR338W	-0.558921881	9.44107812	YOR338W	YOR338W	2.64011404	0	2748	I	I
YOR339C	0.15492	1.9812	0.0782	0.0782	66	55	65	YOR339C	-0.474814486	9.52518551	YOR339C	YOR339C	2.32936441	0.0000181	1336.7	I	I
YOR340C	0.11878	1.3871	0.08563	0.08563	45	7	17	YOR340C	0.34595768	10.3459577	YOR340C	YOR340C	2.40482978	0.00000279	467.9375	I	I
YOR341W	0.03794	1.66148	0.02284	0.02284	86	11	21	YOR341W	1.39875025	11.3987503	YOR341W	RRN1	2.26211638	0.000117	441.358974	I	I
YOR342C	0.22973	1.61123	0.14258	0.14258	7	3	13	YOR342C	-0.236993575	9.76300643	YOR342C	YOR342C	2.38504109	0	2677	I	I
YOR347C	0.09776	1.69105	0.05781	0.05781	137	11	-0.385326007	YOR347C	-0.25729536	9.74270464	YOR347C	PYK2	2.30353849	0.0000245	691.423077	I	I
YOR349W	0.39413	1.7364	0.22698	0.22698	6	0	10	YOR349W	-0.515418056	9.48458194	YOR349W	CIN1	2.32349489	0.00000141	1026.6	I	I
YOR350C	0.51669	1.9036	0.27143	0.27143	0	0	10	YOR350C	-0.587924431	9.41207557	YOR350C	YOR350C	2.42310917	0.00000622	2177	I	I
YOR351C	0.10435	1.73377	0.06019	0.06019	69	11	21	YOR351C	-0.18768924	9.81231076	YOR351C	MRE4	2.34445749	0.00000042	1364.88889	I	I
YOR352W	0.21278	1.82702	0.11646	0.11646	5	8	18	YOR352W	0.076233965	10.076234	YOR352W	YOR352W	2.34026497	0.00000127	1223.72727	I	I
YOR353C	0.21748	1.91198	0.11375	0.11375	17	4	14	YOR353C	-0.805443556	9.19455644	YOR353C	SOG2	2.32148248	0.0003	330.6	I	I
YOR355W	0.17894	1.72582	0.10368	0.10368	24	6	16	YOR355W	-0.18188873	9.81811127	YOR355W	YOR355W	2.35787355	0.0000338	1192.77778	I	I
YOR356W	0.12837	1.9445	0.06602	0.06602	3	0	10	YOR356W	-0.17608822	9.82391178	YOR356W	CIR2	2.37833305	0.00000076	1616.5	I	I
YOR358W	0.14766	1.71682	0.08601	0.08601	23	29	39	YOR358W	-0.906952481	9.09304752	YOR358W	YOR358W	2.39007211	0.00055	747.923077	I	I
YOR360C	0.15238	1.30733	0.11656	0.11656	4	0	10	YOR360C	0.07333371	10.0733337	YOR360C	PDE2	2.4085192	0.00000715	2179	I	I
YOR361C	0.07528	1.72676	0.0436	0.0436	82	3	13	YOR361C	2.18761961	12.1876196	YOR361C	YOR361C	2.26412879	0.000253	322.348485	I	I
YOR363C	0.15371	1.93784	0.07932	0.07932	13	1	11	YOR363C	-0.306599696	9.69340031	YOR363C	OAF2	2.42361228	0.00000029	1573.4	I	I
YOR365C	0.27553	1.88274	0.14634	0.14634	37	4	14	YOR365C	-0.431310661	9.56868934	YOR365C	YOR365C	2.39795405	0.00000039	1830.8	I	I
YOR367W	0.1845	2.09982	0.08787	0.08787	4	0	10	YOR367W	-0.21089128	9.78910872	YOR367W	SCP1	2.2659735	0.0000366	1312	I	I
YOR368W	0.17058	2.24101	0.07612	0.07612	14	1	11	YOR368W	-0.593724941	9.40627506	YOR368W	RAD17	2.34160657	0.0000258	1127.22222	I	I
YOR370C	0.0414	1.86039	0.02226	0.02226	20	0	10	YOR370C	-0.12388363	9.87611637	YOR370C	MSI4	2.42176757	0.000158	472.571429	I	I
YOR372C	0.17234	1.97952	0.08706	0.08706	15	5	15	YOR372C	-0.944655796	9.0553442	YOR372C	YOR372C	2.59366091	0.00000771	1053.33333	I	I
YOR373W	0.23521	1.9327	0.1217	0.1217	29	8	18	YOR373W	-0.408108621	9.59189138	YOR373W	YOR373W	2.31829616	0.000287	544.863636	I	I
YOR374W	0.04509	1.51039	0.02985	0.02985	36	3	13	YOR374W	1.25663775	11.2566378	YOR374W	ALD7	2.34194198	0.00000068	1091.69231	I	I
YOR375C	0.05145	1.00231	0.05133	0.05133	31	2	12	YOR375C	4.28160372	14.2816037	YOR375C	GDH1	2.29381184	0.000146	391.488889	I	I
YOR377W	0.21385	1.89146	0.11306	0.11306	4	2	12	YOR377W	-0.19348975	9.80651025	YOR377W	ATF1	2.37028341	0.0000224	1156.85714	I	I
YPL002C	0.06836	1.91556	0.03569	0.03569	15	0	10	YPL002C	-0.213791535	9.78620847	YPL002C	YPL002C	2.33573705	0.000102	1134.66667	I	I
YPL004C	0.06544	1.81446	0.03607	0.03607	162	9	-0.398408565	YPL004C	1.35234617	11.3523462	YPL004C	YPL004C	2.28710381	0.000144	537.387097	I	I
YPL011C	0.1872	1.81891	0.10292	0.10292	22	10	20	YPL011C	-0.599525451	9.40047455	YPL011C	TAF47	2.33774945	0.0000452	421.24	I	I
YPL015C	0.27724	1.51539	0.18295	0.18295	1	0	10	YPL015C	-0.419709641	9.58029036	YPL015C	YPL015C	2.41455643	0.00000073	1258	I	I
YPL023C	0.06671	1.70052	0.03923	0.03923	17	0	10	YPL023C	-0.326901481	9.67309852	YPL023C	MET12	2.3057186	0.0000164	899.411765	I	I
YPL028W	0.03943	1.36098	0.02897	0.02897	24	1	11	YPL028W	2.28622828	12.2862283	YPL028W	YPL028W	2.33355693	0.00000445	1809	I	I
YPL038W	0.23714	1.77198	0.13383	0.13383	23	19	29	YPL038W	-1.1186711	8.8813289	YPL038W	YPL038W	2.42545698	0.00000002	1648.6	I	I
YPL040C	0.2547	1.9322	0.13182	0.13182	4	0	10	YPL040C	-0.411008876	9.58899112	YPL040C	ISM1	2.346973	0.0000284	1244.8	I	I
YPL041C	0.26709	1.62215	0.16465	0.16465	3	0	10	YPL041C	-0.904052226	9.09594777	YPL041C	MRX11	2.40365588	0	2301	I	I
YPL043W	0.13177	1.99065	0.0662	0.0662	108	30	-0.261041712	YPL043W	0.679487005	10.679487	YPL043W	NOP4	2.25674996	0.000614	209.692308	I	I
YPL046C	0.20843	1.53631	0.13567	0.13567	13	10	20	YPL046C	-0.843146871	9.15685313	YPL046C	ELC1	2.39979876	0.00000181	1202.5	I	I
YPL047W	0.06398	1.49033	0.04293	0.04293	25	3	13	YPL047W	-0.506717291	9.49328271	YPL047W	SGF11	2.30504779	0.0000837	477.606061	I	I
YPL048W	0.19197	2.09031	0.09184	0.09184	87	12	22	YPL048W	2.00200329	12.0020033	YPL048W	TEF3	2.3474761	0.0000147	763.466667	I	I
YPL050C	0.08669	1.71607	0.05051	0.05051	26	1	11	YPL050C	0.69398828	10.6939883	YPL050C	MNN9	2.39879255	0.0000263	349.318182	I	I
YPL060W	0.09777	2.00776	0.0487	0.0487	13	8	18	YPL060W	-0.735837436	9.26416256	YPL060W	YPL060W	2.38940131	0.00000029	1563.4	I	I
YPL061W	0.03056	1.22705	0.02491	0.02491	40	5	15	YPL061W	3.82336343	13.8233634	YPL061W	YPL061W	2.31947007	0.0000202	422	I	I
YPL068C	0.47185	2.15445	0.21901	0.21901	1	14	24	YPL068C	-0.715535651	9.28446435	YPL068C	YPL068C	2.54184136	0.00000569	1616	I	I
YPL069C	0.14782	1.39942	0.10563	0.10563	11	3	13	YPL069C	-0.06007802	9.93992198	YPL069C	YPL069C	2.33087372	0.0000108	1142.09091	I	I
YPL070W	0.15253	1.90187	0.0802	0.0802	37	5	15	YPL070W	-0.376205816	9.62379419	YPL070W	YPL070W	2.36877411	0.000549	295.96875	I	I
YPL071C	0.33833	1.56458	0.21624	0.21624	5	2	12	YPL071C	-0.18188873	9.81811127	YPL071C	YPL071C	2.32181788	0.0000386	1561.33333	I	I
YPL072W	0.48247	2.01551	0.23938	0.23938	1	0	10	YPL072W	-0.524118821	9.47588118	YPL072W	YPL072W	2.38369948	0	2249.6	I	I
YPL074W	0.17593	1.82805	0.09624	0.09624	69	29	39	YPL074W	-0.770640496	9.2293595	YPL074W	YTA6	2.32986752	0.00000139	1150.07692	I	I
YPL076W	0.13394	1.53981	0.08698	0.08698	75	1	11	YPL076W	-0.048477	9.951523	YPL076W	GPI2	2.35435184	0.0000176	2322.25	I	I
YPL077C	0.11091	2.09074	0.05305	0.05305	31	5	15	YPL077C	-0.947556051	9.05244395	YPL077C	YPL077C	2.38956901	0.0000216	670.416667	I	I
YPL078C	0.1161	1.35325	0.08579	0.08579	36	3	13	YPL078C	1.01591659	11.0159166	YPL078C	YPL078C	2.54871709	0.00000578	1173	I	I
YPL091W	0.0735	1.84721	0.03979	0.03979	5	3	13	YPL091W	0.859302815	10.8593028	YPL091W	GLR1	2.4083515	0.0000002	2209.75	I	I
YPL093W	0.03525	1.22853	0.02869	0.02869	148	15	-0.359160892	YPL093W	2.18471935	12.1847194	YPL093W	YPL093W	2.3459668	0.0000524	208.808219	I	I
YPL096W	0.23338	2.01637	0.11574	0.11574	7	0	10	YPL096W	-0.329801736	9.67019827	YPL096W	YPL096W	2.39711555	0.00000882	2133	I	I
YPL098C	0.0937	1.5211	0.0616	0.0616	4	0	10	YPL098C	-0.376205816	9.62379419	YPL098C	YPL098C	2.68405165	0.00000481	1320.5	I	I
YPL103C	0.16557	1.88437	0.08786	0.08786	0	0	10	YPL103C	-0.437111171	9.56288883	YPL103C	YPL103C	2.51601543	0	3491	I	I
YPL105C	0.3961	2.15865	0.18349	0.18349	15	9	19	YPL105C	-0.010773685	9.98922632	YPL105C	YPL105C	2.48029515	0.0000682	852.6	I	I
YPL108W	0.19197	1.643	0.11684	0.11684	7	0	10	YPL108W	-0.703934631	9.29606537	YPL108W	YPL108W	2.34512829	0.0000471	1544.375	I	I
YPL115C	0.23675	2.02681	0.11681	0.11681	28	13	23	YPL115C	-0.463213466	9.53678653	YPL115C	BEM3	2.43904075	0	2000	I	I
YPL121C	0.27848	2.29327	0.12143	0.12143	10	17	27	YPL121C	-0.1644872	9.8355128	YPL121C	MEI5	2.59936274	0.00000878	1064.33333	I	I
YPL126W	0.13635	1.75183	0.07783	0.07783	68	7	17	YPL126W	0.32275564	10.3227556	YPL126W	NAN1	2.29045782	0.0000735	393.958333	I	I
YPL131W	0.01875	0.36703	0.05107	0.05107	124	8	-0.404949843	YPL131W	6.03045748	16.0304575	YPL131W	RPL5	2.23058863	0.000417	114.792683	I	I
YPL133C	0.21913	1.9816	0.11058	0.11058	28	2	12	YPL133C	-0.721336161	9.27866384	YPL133C	YPL133C	2.42495388	0.00000642	857	I	I
YPL137C	0.25734	1.96633	0.13087	0.13087	28	2	12	YPL137C	-0.004973175	9.99502683	YPL137C	GIP3	2.2860976	0.0000643	846.85	I	I
YPL138C	0.24579	2.05103	0.11984	0.11984	29	6	16	YPL138C	-0.564722391	9.43527761	YPL138C	SAF41	2.32886131	0.0000842	769.368421	I	I
YPL139C	0.31587	1.73925	0.18161	0.18161	46	2	12	YPL139C	-0.402308111	9.59769189	YPL139C	UME1	2.32299178	0.0000406	556.576923	I	I
YPL140C	0.20716	1.99155	0.10402	0.10402	79	9	19	YPL140C	-0.556021626	9.44397837	YPL140C	MKK2	2.40633909	0.0000035	1131.16667	I	I
YPL146C	0.22205	1.97497	0.11243	0.11243	175	37	-0.215252761	YPL146C	0.57797808	10.5779781	YPL146C	YPL146C	2.34060037	0.0000216	598.238095	I	I
YPL149W	0.38745	1.99261	0.19444	0.19444	9	0	10	YPL149W	-0.442911681	9.55708832	YPL149W	YPL149W	2.34244508	0.0000789	986.454546	I	I
YPL153C	0.11236	2.07709	0.0541	0.0541	196	56	-0.090968466	YPL153C	-0.524118821	9.47588118	YPL153C	RAD53	2.35904746	0.00000754	588.333333	I	I
YPL157W	0.20305	1.97175	0.10298	0.10298	5	0	10	YPL157W	-0.825745341	9.17425466	YPL157W	TGS1	2.49589133	0.000208	1166.66667	I	I
YPL165C	0.2182	1.65905	0.13152	0.13152	5	0	10	YPL165C	-0.341402756	9.65859725	YPL165C	SET6	2.28861311	0.000135	276.28125	I	I
YPL166W	0.36436	2.13646	0.17054	0.17054	17	3	13	YPL166W	-0.657530551	9.34246945	YPL166W	ATG29	2.37632064	0.00000065	1193.77778	I	I
YPL167C	0.30947	2.03753	0.15188	0.15188	17	0	10	YPL167C	-0.556021626	9.44397837	YPL167C	PSO1	2.3468053	0.00000046	1574.625	I	I
YPL168W	0.61746	2.19136	0.28177	0.28177	0	0	10	YPL168W	-0.764839986	9.23516001	YPL168W	MRX4	2.36307228	0.00000703	1890.83333	I	I
YPL177C	0.27853	1.77879	0.15658	0.15658	9	4	14	YPL177C	-0.703934631	9.29606537	YPL177C	YPL177C	2.48599698	0.00000622	1891.5	I	I
YPL180W	0.34159	2.23201	0.15304	0.15304	42	5	15	YPL180W	-0.602425706	9.39757429	YPL180W	YPL180W	2.41002851	0.0000307	523.6	I	I
YPL181W	0.31065	2.37333	0.13089	0.13089	48	10	20	YPL181W	-0.608226216	9.39177378	YPL181W	CTI6	2.29833976	0.0000477	578.592593	I	I
YPL183C	0.27768	2.16013	0.12855	0.12855	12	0	10	YPL183C	-0.039776235	9.96022377	YPL183C	TRM734	2.34462519	0.00000177	1467.22222	I	I
YPL184C	0.12306	2.26081	0.05443	0.05443	8	4	14	YPL184C	-0.17028771	9.82971229	YPL184C	MRN1	2.36508469	0.0000566	756	I	I
YPL191C	0.39849	2.10952	0.1889	0.1889	11	0	10	YPL191C	-0.294998676	9.70500133	YPL191C	YPL191C	2.47224551	0	2405.66667	I	I
YPL193W	0.54761	2.24403	0.24403	0.24403	16	13	23	YPL193W	-0.692333611	9.30766639	YPL193W	YPL193W	2.44776119	0.0000412	430.454546	I	I
YPL194W	0.27699	2.16157	0.12814	0.12814	16	2	12	YPL194W	-0.692333611	9.30766639	YPL194W	DDC1	2.39107832	0.00000096	1167.85714	I	I
YPL202C	0.35022	2.09443	0.16722	0.16722	7	7	17	YPL202C	-0.512517801	9.4874822	YPL202C	YPL202C	2.41019621	0	2892.66667	I	I
YPL203W	0.05195	1.49446	0.03476	0.03476	1176	593	3.42169819	YPL203W	-0.219592045	9.78040796	YPL203W	YPL203W	2.38990441	0.000356	963.428571	I	I
YPL209C	0.10025	1.97601	0.05073	0.05073	291	173	0.674361142	YPL209C	-0.657530551	9.34246945	YPL209C	YPL209C	2.37749455	0.000127	998	I	I
YPL210C	0.19301	1.74451	0.11064	0.11064	16	6	16	YPL210C	0.16034136	10.1603414	YPL210C	YPL210C	2.3263458	0.00011	487.047619	I	I
YPL211W	0.02559	1.39347	0.01837	0.01837	63	2	12	YPL211W	0.42716482	10.4271648	YPL211W	NIP7	2.32299178	0.0000148	350.122449	I	I
YPL214C	0.12687	1.79095	0.07084	0.07084	1	0	10	YPL214C	0.22414697	10.224147	YPL214C	THI6	2.4293141	0.0000009	1129.14286	I	I
YPL216W	0.7564	2.40522	0.31448	0.31448	54	10	20	YPL216W	-0.631428256	9.36857174	YPL216W	YPL216W	2.40080496	0.00000038	1163.85714	I	I
YPL222W	0.2611	2.26526	0.11526	0.11526	12	0	10	YPL222W	-0.669131571	9.33086843	YPL222W	FMP40	2.35535804	0.0000124	827.583333	I	I
YPL230W	0.43714	1.77112	0.24682	0.24682	16	25	35	YPL230W	-0.970758091	9.02924191	YPL230W	NSF1	2.90508133	0	1321	I	I
YPL231W	0.05589	1.327	0.04212	0.04212	37	3	13	YPL231W	2.89528183	12.8952818	YPL231W	YPL231W	2.27687406	0.0000861	442.974359	I	I
YPL237W	0.04794	0.81446	0.05886	0.05886	52	3	13	YPL237W	1.52926172	11.5292617	YPL237W	YPL237W	2.34412209	0.0000271	447.818182	I	I
YPL239W	0.14795	1.97767	0.07481	0.07481	22	12	22	YPL239W	-0.289198165	9.71080184	YPL239W	YPL239W	2.33288613	0.0000257	842.235294	I	I
YPL243W	0.18549	1.72163	0.10774	0.10774	12	2	12	YPL243W	0.319855385	10.3198554	YPL243W	SRP68	2.28123428	0.000322	594.962963	I	I
YPL244C	0.19047	1.42947	0.13325	0.13325	1	0	10	YPL244C	-0.373305561	9.62669444	YPL244C	YPL244C	2.78433674	0	2030	I	I
YPL245W	0.1143	1.36662	0.08364	0.08364	3	0	10	YPL245W	0.082034475	10.0820345	YPL245W	YPL245W	2.37330203	0.00000011	1727.57143	I	I
YPL246C	0.19316	2.18429	0.08843	0.08843	61	0	10	YPL246C	-0.27469689	9.72530311	YPL246C	YPL246C	2.35636425	0.0000339	1196.125	I	I
YPL247C	0.1612	1.83611	0.08779	0.08779	5	0	10	YPL247C	-0.933054776	9.06694522	YPL247C	YPL247C	2.3461345	0.0000443	1458.875	I	I
YPL249C	0.36619	1.89703	0.19303	0.19303	73	19	29	YPL249C	-0.358804286	9.64119572	YPL249C	YPL249C	2.32215328	0.0000417	1090.81818	I	I
YPL254W	0.16497	1.96234	0.08407	0.08407	54	7	17	YPL254W	-0.544420606	9.45557939	YPL254W	HFI1	2.31209123	0.000193	185.920792	I	I
YPL260W	0.10148	1.84077	0.05513	0.05513	10	3	13	YPL260W	0.221246715	10.2212467	YPL260W	YPL260W	2.35217173	0.0000011	1128.45455	I	I
YPL262W	0.04535	1.56309	0.02901	0.02901	9	1	11	YPL262W	0.888305365	10.8883054	YPL262W	FUM1	2.53261781	0.00000438	1086.75	I	I
YPL263C	0.09389	2.12965	0.04409	0.04409	11	0	10	YPL263C	0.55477604	10.554776	YPL263C	KEL3	2.31041422	0.00000143	1189.28571	I	I
YPL268W	0.17889	2.0269	0.08826	0.08826	9	0	10	YPL268W	-0.535719841	9.46428016	YPL268W	YPL268W	2.44574878	0.0000246	653.1	I	I
YPL270W	0.12637	1.7844	0.07082	0.07082	12	2	12	YPL270W	-0.625627746	9.37437225	YPL270W	YPL270W	2.62820728	0.00000018	1246	I	I
YPL271W	0.11689	1.69188	0.06909	0.06909	10	0	10	YPL271W	-0.347203266	9.65279674	YPL271W	YPL271W	2.35250713	0.00000007	1943.16667	I	I
YPR002W	0.18826	1.85234	0.10163	0.10163	4	0	10	YPR002W	-0.593724941	9.40627506	YPR002W	PDH1	2.30471239	0.00000017	1989.71429	I	I
YPR006C	0.16172	1.81424	0.08914	0.08914	8	0	10	YPR006C	-0.23989383	9.76010617	YPR006C	YPR006C	2.38269328	0.00000082	1829.66667	I	I
YPR007C	0.24971	2.119	0.11785	0.11785	20	4	14	YPR007C	-0.294998676	9.70500133	YPR007C	SPO69	2.46017105	0.00000302	1527.75	I	I
YPR013C	0.30609	1.64054	0.18658	0.18658	22	5	15	YPR013C	-0.779341261	9.22065874	YPR013C	YPR013C	2.44541338	0	2318	I	I
YPR018W	0.35989	2.13018	0.16895	0.16895	57	17	27	YPR018W	-0.390707091	9.60929291	YPR018W	RLF2	2.30018447	0.000348	128.557047	I	I
YPR019W	0.06552	1.72904	0.03789	0.03789	68	5	15	YPR019W	0.17194238	10.1719424	YPR019W	CDC54	2.34026497	0.0000227	568.52	I	I
YPR020W	0.15216	1.43803	0.10581	0.10581	14	0	10	YPR020W	-0.834446106	9.16555389	YPR020W	ATP20	2.35435184	0.0000176	2322.25	I	I
YPR024W	0.06325	1.71064	0.03697	0.03697	20	4	14	YPR024W	0.19514442	10.1951444	YPR024W	OSD1	2.39493544	0.0000269	1120	I	I
YPR025C	0.24952	2.40505	0.10375	0.10375	24	1	11	YPR025C	-0.677832336	9.32216766	YPR025C	YPR025C	2.29213483	0.000243	297.59375	I	I
YPR031W	0.29072	1.80493	0.16107	0.16107	12	0	10	YPR031W	-0.367505051	9.63249495	YPR031W	YPR031W	2.30152608	0.0000064	719.318182	I	I
YPR032W	0.19667	1.9309	0.10185	0.10185	46	3	13	YPR032W	-0.521218566	9.47878143	YPR032W	SRO7	2.49304042	0.00000439	446.666667	I	I
YPR033C	0.11038	1.7616	0.06266	0.06266	6	0	10	YPR033C	1.63077065	11.6307707	YPR033C	YPR033C	2.31863156	0.0000298	1363.8	I	I
YPR047W	0.17333	2.07738	0.08344	0.08344	9	1	11	YPR047W	-0.138384905	9.8616151	YPR047W	MSF1	2.46738219	0	2760.5	I	I
YPR049C	0.2914	2.10735	0.13828	0.13828	51	8	18	YPR049C	-0.242794085	9.75720592	YPR049C	YPR049C	2.27620325	0.000131	629.321429	I	I
YPR052C	0.01083	0.6386	0.01695	0.01695	89	17	27	YPR052C	2.02230507	12.0223051	YPR052C	YPR052C	2.38068087	0.0000165	234.722222	I	I
YPR054W	0.09939	1.77277	0.05606	0.05606	184	59	-0.07134463	YPR054W	-0.698134121	9.30186588	YPR054W	SMK1	2.31913466	0	1920.85714	I	I
YPR056W	0.05885	1.80395	0.03262	0.03262	21	0	10	YPR056W	-0.732937181	9.26706282	YPR056W	TFB4	2.40348818	0.0000611	344	I	I
YPR057W	0.4309	2.2022	0.19567	0.19567	17	7	17	YPR057W	-0.616926981	9.38307302	YPR057W	BRR1	2.62887808	0	1510	I	I
YPR060C	0.09699	2.01483	0.04814	0.04814	5	5	15	YPR060C	0.638883435	10.6388834	YPR060C	ARO7	2.50779809	0.00000005	1090.66667	I	I
YPR067W	0.27429	1.98681	0.13805	0.13805	18	11	21	YPR067W	-0.483515251	9.51648475	YPR067W	YPR067W	2.90508133	0	1321	I	I
YPR073C	0.14423	1.85053	0.07794	0.07794	3	1	11	YPR073C	0.499671195	10.4996712	YPR073C	LTP1	2.39996646	0.00000624	1606.66667	I	I
YPR078C	0.55454	2.17283	0.25522	0.25522	3	1	11	YPR078C	-0.434210916	9.56578908	YPR078C	YPR078C	2.30504779	0.00000521	891.294118	I	I
YPR083W	0.2408	1.78713	0.13474	0.13474	19	6	16	YPR083W	-0.309499951	9.69050005	YPR083W	MDM36	2.35737045	0.00000026	1654.5	I	I
YPR086W	0.02385	1.61397	0.01477	0.01477	50	0	10	YPR086W	0.041430905	10.0414309	YPR086W	YPR086W	2.27419084	0.000104	348.403226	I	I
YPR088C	0.02527	1.57555	0.01604	0.01604	33	7	17	YPR088C	0.534474255	10.5344743	YPR088C	YPR088C	2.42159987	0.0000527	422.375	I	I
YPR091C	0.21756	2.10893	0.10316	0.10316	28	2	12	YPR091C	0.047231415	10.0472314	YPR091C	YPR091C	2.33171223	0.0000264	1540.85714	I	I
YPR100W	0.06759	1.75301	0.03856	0.03856	7	0	10	YPR100W	-0.602425706	9.39757429	YPR100W	YPR100W	2.36978031	0.0000436	605.5	I	I
YPR102C	0.01364	0.5657	0.02411	0.02411	103	3	-0.437656237	YPR102C	6.10586411	16.1058641	YPR102C	YPR102C	2.35569344	0.0000363	306.225807	I	I
YPR103W	0.0448	1.41245	0.03172	0.03172	54	0	10	YPR103W	0.60698063	10.6069806	YPR103W	YPR103W	2.43216502	0.000146	289.833333	I	I
YPR105C	0.1628	1.83643	0.08865	0.08865	30	1	11	YPR105C	-0.29209842	9.70790158	YPR105C	YPR105C	2.34060037	0.0000505	591.5	I	I
YPR107C	0.02136	1.99572	0.0107	0.0107	23	1	11	YPR107C	-0.709735141	9.29026486	YPR107C	YTH1	2.35502264	0.0000329	524.090909	I	I
YPR108W	0.08655	1.86141	0.04649	0.04649	50	7	17	YPR108W	0.134239065	10.1342391	YPR108W	RPN7	2.31376824	0.000023	411.611111	I	I
YPR114W	0.1825	1.57657	0.11576	0.11576	7	1	11	YPR114W	0.60118012	10.6011801	YPR114W	YPR114W	2.39208452	0.0000186	836.090909	I	I
YPR134W	0.60447	1.85701	0.32551	0.32551	4	0	10	YPR134W	-0.753238966	9.24676103	YPR134W	MSS18	2.38470569	0	2461.33333	I	I
YPR137W	0.11061	1.87128	0.05911	0.05911	50	12	22	YPR137W	-0.00207292	9.99792708	YPR137W	YPR137W	2.35284253	0.0000659	291.023256	I	I
YPR140W	0.13965	1.79395	0.07785	0.07785	10	0	10	YPR140W	-0.326901481	9.67309852	YPR140W	TAZ1	2.32014087	0.0000105	924.294118	I	I
YPR147C	0.21623	1.94411	0.11122	0.11122	2	0	10	YPR147C	-0.326901481	9.67309852	YPR147C	YPR147C	2.45547543	0	1501.75	I	I
YPR148C	0.23018	2.12563	0.10829	0.10829	12	10	20	YPR148C	0.447466605	10.4474666	YPR148C	YPR148C	2.59399631	0	1792	I	I
YPR155C	0.20687	1.89442	0.1092	0.1092	40	5	15	YPR155C	-0.364604796	9.63539521	YPR155C	NCA2	2.78433674	0	2030	I	I
YPR156C	0.03954	1.57282	0.02514	0.02514	81	10	20	YPR156C	1.111625	11.111625	YPR156C	YPR156C	2.47425792	0.00000573	665.5	I	I
YPR157W	0.19505	2.07742	0.09389	0.09389	1	0	10	YPR157W	-0.382006326	9.61799367	YPR157W	TDA6	2.51601543	0	3491	I	I
YPR160W	0.04119	1.58847	0.02593	0.02593	45	2	12	YPR160W	1.22473495	11.224735	YPR160W	GPH1	2.38185477	0.0000118	816.2	I	I
YPR161C	0.20132	2.00132	0.1006	0.1006	112	18	-0.339537056	YPR161C	-0.643029276	9.35697072	YPR161C	SGV1	2.26647661	0.0000779	364.148936	I	I
YPR162C	0.19158	1.97354	0.09708	0.09708	21	1	11	YPR162C	-0.411008876	9.58899112	YPR162C	ORC4	2.31930236	0.0000375	696.045455	I	I
YPR167C	0.0902	1.51862	0.0594	0.0594	7	0	10	YPR167C	-0.028175215	9.97182479	YPR167C	YPR167C	2.38252557	0.0000172	1561.42857	I	I
YPR169W	0.25008	2.21938	0.11268	0.11268	26	7	17	YPR169W	0.186443655	10.1864437	YPR169W	JIP5	2.33439544	0.0000295	1255.1	I	I
YPR171W	0.45381	1.80366	0.25161	0.25161	43	0	10	YPR171W	-0.692333611	9.30766639	YPR171W	BSP1	2.28190508	0.0000492	937.6875	I	I
YPR175W	0.17435	1.86242	0.09361	0.09361	48	6	16	YPR175W	-0.303699441	9.69630056	YPR175W	YPR175W	2.29297334	0.0000926	555.269231	I	I
YPR178W	0.2404	2.13362	0.11267	0.11267	84	24	34	YPR178W	-0.660430806	9.33956919	YPR178W	PRP4	2.37749455	0.0000258	261.484849	I	I
YPR180W	0.22845	2.00205	0.11411	0.11411	13	6	16	YPR180W	-0.138384905	9.8616151	YPR180W	YPR180W	2.34563139	0.00000465	736.95	I	I
YPR181C	0.02118	1.36034	0.01557	0.01557	61	2	12	YPR181C	0.67658675	10.6765868	YPR181C	SEC23	2.2859299	0.0000691	488.45	I	I
YPR184W	0.12009	2.03135	0.05912	0.05912	15	1	11	YPR184W	-0.057177765	9.94282224	YPR184W	GDB1	2.31091732	0.000078	540.730769	I	I
YPR185W	0.1428	1.72881	0.0826	0.0826	13	4	14	YPR185W	-0.732937181	9.26706282	YPR185W	APG13	2.36290458	0.0000161	1432.16667	I	I
YPR186C	0.23462	2.25848	0.10388	0.10388	6	9	19	YPR186C	-0.648829786	9.35117021	YPR186C	PZF1	2.51232601	0.0000001	1841	I	I
YPR189W	0.16934	2.03068	0.08339	0.08339	35	0	10	YPR189W	-0.1644872	9.8355128	YPR189W	SKI3	2.27352004	0.0000778	359.637931	I	I
YAL008W	0.25305	1.63434	0.15483	0.15483	3	0	10	YAL008W	-0.367505051	9.63249495	YAL008W	FUN14	2.91078316	0.0000194	293.6	P	P
YAL010C	0.19558	1.6629	0.11761	0.11761	14	3	13	YAL010C	-0.625627746	9.37437225	YAL010C	FUN37	2.62317625	0.00000516	420.454546	P	P
YAL022C	0.1719	2.06694	0.08317	0.08317	8	1	11	YAL022C	-0.161586945	9.83841306	YAL022C	FUN26	2.9788697	0	1145	P	P
YAL025C	0.07037	1.61135	0.04367	0.04367	18	7	17	YAL025C	0.911507405	10.9115074	YAL025C	MAK16	3.03018615	0.00000013	148.222222	P	P
YAL028W	0.38104	2.10279	0.18121	0.18121	63	10	20	YAL028W	-0.619827236	9.38017276	YAL028W	HPH2	4.0001677	0	54	P	P
YAL033W	0.16112	1.75573	0.09177	0.09177	8	0	10	YAL033W	-0.738737691	9.26126231	YAL033W	YAL033W	2.95304377	0.00130487	90	P	P
YAL046C	0.21297	1.42006	0.14998	0.14998	3	0	10	YAL046C	-0.329801736	9.67019827	YAL046C	AIM1	3.55290961	0.00000035	12.3333333	P	P
YAL047C	0.29834	1.79568	0.16614	0.16614	165	55	-0.097509745	YAL047C	-0.202190515	9.79780949	YAL047C	SPC72	2.83146067	0.000444	76.2142857	P	P
YAL054C	0.04151	1.65631	0.02506	0.02506	43	1	11	YAL054C	0.78099593	10.7809959	YAL054C	YAL054C	3.31024652	0	19	P	P
YBL010C	0.2831	1.79033	0.15813	0.15813	16	6	16	YBL010C	-0.614026726	9.38597327	YBL010C	YBL010C	3.21415395	0.0000001	80.5	P	P
YBL011W	0.13486	1.6708	0.08072	0.08072	34	1	11	YBL011W	-0.05427751	9.94572249	YBL011W	YBL011W	3.13986249	0.00000009	131.5	P	P
YBL049W	0.02404	1.49204	0.01611	0.01611	6	0	10	YBL049W	0.00372759	10.0037276	YBL049W	YBL049W	3.26832131	0.00000015	68	P	P
YBL069W	0.11214	1.84256	0.06086	0.06086	8	0	10	YBL069W	-0.028175215	9.97182479	YBL069W	AST1	3.09357706	0.00000742	320.5	P	P
YBL095W	0.2565	2.05734	0.12467	0.12467	4	0	10	YBL095W	-0.756139221	9.24386078	YBL095W	MRX3	3.39409693	0	263	P	P
YBL102W	0.08151	1.75491	0.04645	0.04645	27	3	13	YBL102W	-0.773540751	9.22645925	YBL102W	YBL102W	3.20677511	0.00000019	78.6	P	P
YBR029C	0.06497	1.40357	0.04629	0.04629	4	0	10	YBR029C	0.18934391	10.1893439	YBR029C	CDS1	3.30169378	0.00000006	38	P	P
YBR036C	0.12189	1.67049	0.07296	0.07296	50	5	15	YBR036C	0.076233965	10.076234	YBR036C	CSG2	3.44189167	0.00000003	5.5	P	P
YBR058C-A	0.10996	1.40321	0.07836	0.07836	9	10	20	YBR058C-A	-0.712635396	9.2873646	YBR058C-A	TSC3	3.28676841	0	22	P	P
YBR102C	0.14103	1.90853	0.0739	0.0739	43	6	16	YBR102C	-0.373305561	9.62669444	YBR102C	USA3	2.59953044	0.0000127	258.388889	P	P
YBR111C	0.10047	2.0611	0.04875	0.04875	5	0	10	YBR111C	0.71138981	10.7113898	YBR111C	YSA1	3.34965621	0	21	P	P
YBR121C	0.04741	1.39542	0.03397	0.03397	26	3	13	YBR121C	2.5878548	12.5878548	YBR121C	GRS1	2.91396948	0.0000144	125.833333	P	P
YBR132C	0.09035	1.76361	0.05123	0.05123	11	3	13	YBR132C	-0.260195615	9.73980439	YBR132C	AGP2	2.91329868	0.0000111	388.25	P	P
YBR138C	0.22403	1.91424	0.11704	0.11704	15	14	24	YBR138C	-0.486415506	9.51358449	YBR138C	YBR138C	2.56263626	0.0000374	391	P	P
YBR140C	0.14418	2.10632	0.06845	0.06845	28	5					YBR140C	GLC1	2.94180781	0.0000021	336	P	P
YBR145W	0.09846	2.24642	0.04383	0.04383	128	3	-0.437656237	YBR145W	1.10872475	11.1087248	YBR145W	YBR145W	3.30353849	0	33	P	P
YBR146W	0.12137	1.68038	0.07223	0.07223	31	1	11	YBR146W	-0.396507601	9.6034924	YBR146W	YBR146W	3.08753983	0.0000007	74.7777778	P	P
YBR167C	0.29919	1.67347	0.17878	0.17878	14	5	15	YBR167C	-0.347203266	9.65279674	YBR167C	POP7	2.99044105	0.000295	62.0833333	P	P
YBR168W	0.36886	1.75544	0.21013	0.21013	5	0	10	YBR168W	-0.492216016	9.50778398	YBR168W	YBR168W	2.73721281	0.00000001	895.666667	P	P
YBR170C	0.15836	1.8562	0.08532	0.08532	25	1	11	YBR170C	-0.515418056	9.48458194	YBR170C	YBR170C	2.8156968	0.000041	156.733333	P	P
YBR173C	0.1251	1.44594	0.08652	0.08652	27	3	13	YBR173C	-0.022374705	9.9776253	YBR173C	YBR173C	3.00721114	0.0000096	408.5	P	P
YBR176W	0.15809	1.88762	0.08375	0.08375	6	0	10	YBR176W	0.0095281	10.0095281	YBR176W	YBR176W	3.20677511	0	236	P	P
YBR177C	0.15446	1.79184	0.0862	0.0862	48	1	11	YBR177C	0.087834985	10.087835	YBR177C	EHT1	2.61428811	0.0000006	646	P	P
YBR180W	0.19795	2.02735	0.09764	0.09764	3	1	11	YBR180W	-0.585024176	9.41497582	YBR180W	YBR180W	3.23612276	0.00000106	72.5	P	P
YBR182C	0.58303	2.15007	0.27117	0.27117	16	0	10	YBR182C	-0.817044576	9.18295542	YBR182C	YBR182C	3.12141539	0.00000044	136.333333	P	P
YBR199W	0.33479	2.34367	0.14285	0.14285	29	21	31	YBR199W	-0.260195615	9.73980439	YBR199W	KTR4	2.96931075	0.00000043	594.5	P	P
YBR201W	0.15222	1.58543	0.09601	0.09601	10	1	11	YBR201W	-0.715535651	9.28446435	YBR201W	YBR201W	3.19486835	0.00000002	28	P	P
YBR203W	0.21835	1.89697	0.11511	0.11511	2	0	10	YBR203W	0.041430905	10.0414309	YBR203W	YBR203W	3.09374476	0.00000078	186.666667	P	P
YBR222C	0.07911	2.14812	0.03683	0.03683	8	1	11	YBR222C	0.37496023	10.3749602	YBR222C	FAT2	2.93241657	0.00000851	184.583333	P	P
YBR228W	0.26009	2.13642	0.12174	0.12174	6	0	10	YBR228W	-0.828645596	9.1713544	YBR228W	SLX1	3.40449438	0	70	P	P
YBR233W-A	0.14682	2.04186	0.07191	0.07191	42	168	178	YBR233W-A	-0.616926981	9.38307302	YBR233W-A	YBR233W-A	3.37615294	0	17	P	P
YBR242W	0.18242	1.5797	0.11547	0.11547	4	0	10	YBR242W	-0.01947445	9.98052555	YBR242W	YBR242W	3.02934764	0.00000337	330.666667	P	P
YBR258C	0.36218	1.97976	0.18294	0.18294	7	12	22	YBR258C	-0.466113721	9.53388628	YBR258C	YBR258C	2.95623009	0.00000686	163.5	P	P
YBR282W	0.10444	2.0997	0.04974	0.04974	16	1	11	YBR282W	-0.434210916	9.56578908	YBR282W	YBR282W	2.6728157	0.00000064	397.285714	P	P
YBR285W	0.2905	1.70175	0.17071	0.17071	12	2	12	YBR285W	0.18934391	10.1893439	YBR285W	YBR285W	4.0001677	0	54	P	P
YCL009C	0.04273	1.37211	0.03114	0.03114	19	1	11	YCL009C	0.95501123	10.9550112	YCL009C	ILV6	2.46302197	0.00000388	334.863636	P	P
YCL038C	0.15094	1.8854	0.08006	0.08006	4	0	10	YCL038C	-0.341402756	9.65859725	YCL038C	YCL038C	3.20694281	0.00000159	164	P	P
YCL047C	0.19631	1.69991	0.11548	0.11548	7	4	14	YCL047C	-0.738737691	9.26126231	YCL047C	YCL047C	3.03639108	0.00000631	273	P	P
YCL056C	0.25811	1.64336	0.15706	0.15706	15	0	10	YCL056C	-0.730036926	9.26996307	YCL056C	YCL056C	2.90726145	0.000394	124.583333	P	P
YCR021C	0.17761	1.47426	0.12048	0.12048	43	4	14	YCR021C	0.80999848	10.8099985	YCR021C	YCR021C	3.37531444	0.00000454	149	P	P
YCR045C	0.09375	2.27217	0.04126	0.04126	8	2	12	YCR045C	-0.608226216	9.39177378	YCR045C	YCR045C	2.9788697	0	1145	P	P
YCR068W	0.22927	1.73414	0.13221	0.13221	4	0	10	YCR068W	-0.376205816	9.62379419	YCR068W	ATG15	3.30035217	0.00000278	21.25	P	P
YCR072C	0.04054	1.51585	0.02674	0.02674	51	14	24	YCR072C	0.29375309	10.2937531	YCR072C	RSA4	2.65118229	0.0000152	222.590909	P	P
YCR073W-A	0.07098	1.79845	0.03947	0.03947	46	6	16	YCR073W-A	-0.753238966	9.24676103	YCR073W-A	SOL2	2.94298172	0.00000603	220.833333	P	P
YDL006W	0.06056	1.63362	0.03707	0.03707	43	1	11	YDL006W	-0.593724941	9.40627506	YDL006W	PTC1	3.02381352	0.00000381	179	P	P
YDL017W	0.05467	1.8449	0.02963	0.02963	64	8	18	YDL017W	-0.440011426	9.55998857	YDL017W	CDC7	2.40315278	0.000555	231.09375	P	P
YDL030W	0.31072	1.84644	0.16828	0.16828	60	7	17	YDL030W	-0.477714741	9.52228526	YDL030W	YDL030W	2.77679021	0.0000402	119	P	P
YDL072C	0.09627	1.65483	0.05817	0.05817	41	3	13	YDL072C	0.203845185	10.2038452	YDL072C	YDL072C	3.08787523	0.00000186	322.5	P	P
YDL088C	0.39003	2.28734	0.17052	0.17052	41	8	18	YDL088C	-0.315300461	9.68469954	YDL088C	ASM4	3.0823411	0.00000568	36.9411765	P	P
YDL099W	0.59911	2.76197	0.21691	0.21691	80	66	76	YDL099W	-0.08908057	9.91091943	YDL099W	YDL099W	2.97400637	0.00000462	358	P	P
YDL107W	0.31412	2.27331	0.13818	0.13818	2	0	10	YDL107W	-0.512517801	9.4874822	YDL107W	MSS2	2.76152943	0.00000023	490.333333	P	P
YDL120W	0.25725	1.48996	0.17266	0.17266	12	1	11	YDL120W	-0.724236416	9.27576358	YDL120W	YDL120W	3.25272514	0.00000169	30	P	P
YDL121C	0.2857	2.28856	0.12484	0.12484	8	5	15	YDL121C	-0.11228261	9.88771739	YDL121C	YDL121C	3.21448935	0.00000012	89	P	P
YDL138W	0.21276	1.84645	0.11522	0.11522	13	5	15	YDL138W	-0.660430806	9.33956919	YDL138W	RGT2	2.78198893	0.0000112	344.428571	P	P
YDL153C	0.20766	2.06776	0.10043	0.10043	88	11	21	YDL153C	0.702689045	10.7026891	YDL153C	SAS10	2.49974845	0.0000566	159.657895	P	P
YDL180W	0.25467	1.59959	0.15921	0.15921	1	2	12	YDL180W	-0.596625196	9.4033748	YDL180W	YDL180W	2.97316787	0.00000492	590.5	P	P
YDL194W	0.20926	1.99362	0.10497	0.10497	13	5	15	YDL194W	-0.422609896	9.5773901	YDL194W	YDL194W	3.09391246	0	298	P	P
YDL207W	0.22444	1.85769	0.12082	0.12082	52	11	21	YDL207W	-0.689433356	9.31056664	YDL207W	GLE1	2.90994466	0.000175	50.9714286	P	P
YDL213C	0.11217	1.89406	0.05922	0.05922	102	34	-0.234876597	YDL213C	-0.115182865	9.88481714	YDL213C	NOP6	2.73067248	0.000103	131.897436	P	P
YDL217C	0.02903	2.22306	0.01306	0.01306	10	3	13	YDL217C	-1.0345637	8.9654363	YDL217C	YDL217C	3.41941976	0.000062	11.25	P	P
YDL218W	0.20375	2.15973	0.09434	0.09434	1	0	10	YDL218W	-0.1644872	9.8355128	YDL218W	YDL218W	3.54536307	0.00000053	28.5	P	P
YDL235C	0.09223	1.52899	0.06032	0.06032	20	3	13	YDL235C	0.42716482	10.4271648	YDL235C	YDL235C	3.26664431	0	36	P	P
YDL237W	0.25047	1.8351	0.13649	0.13649	1	1	11	YDL237W	0.029829885	10.0298299	YDL237W	YDL237W	2.9788697	0	1145	P	P
YDR031W	0.15176	1.68531	0.09005	0.09005	1	0	10	YDR031W	-0.387806836	9.61219316	YDR031W	MIX14	3.62535636	0	106	P	P
YDR045C	0.01196	1.39045	0.0086	0.0086	25	0	10	YDR045C	0.070433455	10.0704335	YDR045C	YDR045C	3.13868858	0.00000231	86	P	P
YDR062W	0.07155	1.89729	0.03771	0.03771	19	0	10	YDR062W	0.691088025	10.691088	YDR062W	LCB2	2.4693946	0.000159	307.9375	P	P
YDR072C	0.2229	1.80051	0.1238	0.1238	5	0	10	YDR072C	0.006627845	10.0066279	YDR072C	YDR072C	3.69176589	0	38	P	P
YDR079W	0.03807	1.47985	0.02573	0.02573	3	1	11	YDR079W	-0.732937181	9.26706282	YDR079W	YDR079W	3.27687406	0	611	P	P
YDR086C	0.04915	1.12318	0.04376	0.04376	28	12	22	YDR086C	2.91558361	12.9155836	YDR086C	YDR086C	2.88898206	0.000138	158.666667	P	P
YDR116C	0.16865	2.31046	0.073	0.073	30	0	10	YDR116C	-0.730036926	9.26996307	YDR116C	YDR116C	3.12678182	0.00000637	47.25	P	P
YDR167W	0.12945	1.84032	0.07034	0.07034	77	20	30	YDR167W	-0.988159621	9.01184038	YDR167W	TAF25	2.4085192	0.0000797	186.295455	P	P
YDR176W	0.23903	2.14825	0.11127	0.11127	49	9	19	YDR176W	-0.500916781	9.49908322	YDR176W	YDR176W	2.49270501	0.0000488	231.6	P	P
YDR177W	0.02713	1.59372	0.01702	0.01702	19	16	26	YDR177W	-0.132584395	9.86741561	YDR177W	YDR177W	2.61110179	0.00000187	496.166667	P	P
YDR184C	0.20105	1.69968	0.11828	0.11828	16	13	23	YDR184C	-0.178988475	9.82101153	YDR184C	YDR184C	3.05953379	0.0000402	180	P	P
YDR185C	0.1358	1.70568	0.07962	0.07962	5	0	10	YDR185C	-0.20509077	9.79490923	YDR185C	GEP2	3.2866007	0	115	P	P
YDR192C	0.51858	2.21705	0.2339	0.2339	75	22	32	YDR192C	-1.04036421	8.95963579	YDR192C	UIP1	3.03907429	0.00000203	67.9090909	P	P
YDR204W	0.15917	1.59934	0.09952	0.09952	3	0	10	YDR204W	-0.648829786	9.35117021	YDR204W	COQ4	2.87070267	0.0000208	179.75	P	P
YDR205W	0.2671	1.73662	0.1538	0.1538	2	1	11	YDR205W	-0.524118821	9.47588118	YDR205W	MSC2	3.08452121	0.0000132	205.333333	P	P
YDR218C	0.25006	2.62441	0.09528	0.09528	42	35	45	YDR218C	-0.283397655	9.71660235	YDR218C	SPR28	2.89233607	0.00000021	718	P	P
YDR231C	0.15651	1.48937	0.10509	0.10509	8	6	16	YDR231C	-0.799643046	9.20035695	YDR231C	YDR231C	3.07294986	0.00000076	412.5	P	P
YDR239C	0.44485	2.14549	0.20734	0.20734	24	3	13	YDR239C	-0.654630296	9.3453697	YDR239C	YDR239C	2.77829951	0.00000104	373	P	P
YDR253C	0.29967	1.70997	0.17525	0.17525	35	27	37	YDR253C	-0.930154521	9.06984548	YDR253C	YDR253C	3.14791212	0.00000018	199	P	P
YDR265W	0.35697	1.63777	0.21796	0.21796	19	0	10	YDR265W	-0.585024176	9.41497582	YDR265W	YDR265W	2.49622673	0.000312	360	P	P
YDR275W	0.31111	1.70407	0.18257	0.18257	7	5	15	YDR275W	-0.770640496	9.2293595	YDR275W	YDR275W	3.39409693	0	263	P	P
YDR284C	0.14799	1.80559	0.08196	0.08196	32	2	12	YDR284C	-0.358804286	9.64119572	YDR284C	YDR284C	3.07378836	0.0000866	49.3809524	P	P
YDR319C	0.23683	1.49618	0.15829	0.15829	1	0	10	YDR319C	-0.637228766	9.36277123	YDR319C	YDR319C	2.9788697	0	1145	P	P
YDR329C	0.206	1.75354	0.11748	0.11748	11	2	12	YDR329C	-0.364604796	9.63539521	YDR329C	PAS3	3.31309743	0.00000003	10	P	P
YDR331W	0.16548	1.69236	0.09778	0.09778	63	0	10	YDR331W	-0.109382355	9.89061765	YDR331W	YDR331W	2.70182794	0.00000191	819.666667	P	P
YDR332W	0.18504	1.99552	0.09273	0.09273	6	0	10	YDR332W	-0.660430806	9.33956919	YDR332W	YDR332W	3.04963944	0	715	P	P
YDR348C	0.18503	2.06144	0.08976	0.08976	22	6	16	YDR348C	-0.466113721	9.53388628	YDR348C	PAL1	3.39376153	0.000335	132	P	P
YDR351W	0.2803	1.84843	0.15164	0.15164	7	1	11	YDR351W	-0.669131571	9.33086843	YDR351W	YDR351W	3.01056515	0.00000015	395.333333	P	P
YDR373W	0.02137	1.98841	0.01075	0.01075	6	1	11	YDR373W	-0.028175215	9.97182479	YDR373W	YDR373W	2.64044944	0.00153922	82.0277778	P	P
YDR375C	0.09652	1.87101	0.05159	0.05159	10	0	10	YDR375C	-0.213791535	9.78620847	YDR375C	BCS1	3.34043267	0	20	P	P
YDR383C	0.25964	2.18623	0.11876	0.11876	23	10	20	YDR383C	-0.431310661	9.56868934	YDR383C	YDR383C	3.15596176	0.00000669	34.5	P	P
YDR429C	0.04513	1.20185	0.03755	0.03755	45	2	12	YDR429C	1.08262245	11.0826225	YDR429C	TIF35	2.45329532	0.000036	223.711111	P	P
YDR437W	0.181	1.86798	0.0969	0.0969	2	1	11	YDR437W	-0.390707091	9.60929291	YDR437W	GPI19	3.22170049	0.000345	10.9090909	P	P
YDR441C	0.20902	1.58534	0.13184	0.13184	10	5	15	YDR441C	-0.651730041	9.34826996	YDR441C	APT2	2.89065906	0.000337	344.25	P	P
YDR446W	0.3353	2.10445	0.15933	0.15933	10	6	16	YDR446W	-0.535719841	9.46428016	YDR446W	ECM11	2.95186986	0.00000163	260.2	P	P
YDR459C	0.34066	1.78315	0.19104	0.19104	6	0	10	YDR459C	-0.466113721	9.53388628	YDR459C	YDR459C	3.27687406	0	611	P	P
YDR464W	0.34335	2.12683	0.16144	0.16144	11	2	12	YDR464W	-0.15868669	9.84131331	YDR464W	SPP41	3.01039745	0	806	P	P
YDR468C	0.14171	2.09003	0.0678	0.0678	65	32	42	YDR468C	0.093635495	10.0936355	YDR468C	YDR468C	3.29096093	0.00000015	10.5	P	P
YDR469W	0.60254	1.68106	0.35843	0.35843	16	13	23	YDR469W	-0.793842536	9.20615746	YDR469W	SAF19	3.16904243	0.00000083	40.1818182	P	P
YDR479C	0.17804	1.8622	0.09561	0.09561	54	4	14	YDR479C	-0.628528001	9.371472	YDR479C	PEX29	3.14522891	0.000189	13.3428571	P	P
YDR493W	0.19401	1.76329	0.11003	0.11003	1	0	10	YDR493W	-0.492216016	9.50778398	YDR493W	YDR493W	3.47526413	0	40	P	P
YDR497C	0.09755	1.6647	0.0586	0.0586	37	10	20	YDR497C	0.482269665	10.4822697	YDR497C	YDR497C	3.07009894	0.00000228	127.214286	P	P
YDR503C	0.13929	1.70959	0.08148	0.08148	6	0	10	YDR503C	-0.561822136	9.43817786	YDR503C	YDR503C	3.24886802	0.00000012	31	P	P
YDR514C	0.24613	2.13545	0.11526	0.11526	6	1	11	YDR514C	-0.637228766	9.36277123	YDR514C	YDR514C	3.09558947	0	754	P	P
YDR529C	0.07336	1.75502	0.0418	0.0418	12	1	11	YDR529C	0.62438216	10.6243822	YDR529C	QCR7	2.94784504	0.00000419	185.714286	P	P
YDR531W	0.08414	1.49515	0.05627	0.05627	2	1	11	YDR531W	-0.178988475	9.82101153	YDR531W	CAB1	2.5307731	0.000234	390.272727	P	P
YEL002C	0.17121	1.67589	0.10216	0.10216	57	1	11	YEL002C	0.435865585	10.4358656	YEL002C	WBP1	3.0197887	0.0000015	130.75	P	P
YEL024W	0.03677	1.31721	0.02792	0.02792	18	0	10	YEL024W	1.96720023	11.9672002	YEL024W	YEL024W	3.28123428	0	49.5	P	P
YEL026W	0.00385	0.49567	0.00776	0.00776	50	5	15	YEL026W	4.8500537	14.8500537	YEL026W	SNU13	2.84185813	0.000107	121.615385	P	P
YEL041W	0.28009	2.11802	0.13224	0.13224	23	2	12	YEL041W	-0.515418056	9.48458194	YEL041W	YEL041W	3.16484991	0.0000093	307	P	P
YEL063C	0.11078	1.91352	0.0579	0.0579	93	18	28	YEL063C	0.69978879	10.6997888	YEL063C	YEL063C	2.9788697	0	1145	P	P
YEL064C	0.11747	1.86774	0.06289	0.06289	5	1	11	YEL064C	-0.556021626	9.44397837	YEL064C	YEL064C	3.2647996	0.00000014	67.5	P	P
YEL065W	0.11626	1.93832	0.05998	0.05998	15	2	12	YEL065W	0.54317502	10.543175	YEL065W	SIT1	2.9788697	0	1145	P	P
YER010C	0.20845	1.67706	0.1243	0.1243	6	0	10	YER010C	-0.506717291	9.49328271	YER010C	YER010C	3.92067751	0	25	P	P
YER012W	0.05557	1.3382	0.04153	0.04153	116	4	-0.431114958	YER012W	0.31115462	10.3111546	YER012W	PRE1	3.07026664	0.00000113	93.9166667	P	P
YER017C	0.10966	1.94654	0.05633	0.05633	31	6	16	YER017C	-0.1064821	9.8935179	YER017C	YER017C	2.79775281	0.0000254	103	P	P
YER019C-A	0.11133	1.14289	0.09741	0.09741	38	9	19	YER019C-A	-0.213791535	9.78620847	YER019C-A	SEB2	3.18581251	0.00000965	36.8	P	P
YER027C	0.12903	1.52673	0.08451	0.08451	47	21	31	YER027C	-0.306599696	9.69340031	YER027C	YER027C	3.05500587	0.00000001	226.25	P	P
YER029C	0.16946	2.41431	0.07019	0.07019	98	18	28	YER029C	-1.08386804	8.91613196	YER029C	YER029C	2.41774275	0.000154	104.089552	P	P
YER038C	0.4263	1.9726	0.21611	0.21611	3	5	15	YER038C	-0.062978275	9.93702173	YER038C	KRE29	3.37464364	0	37	P	P
YER042W	0.12399	3.11195	0.03984	0.03984	9	1	11	YER042W	-0.289198165	9.71080184	YER042W	YER042W	2.96025491	0.00000253	273.75	P	P
YER044C	0.07368	1.0271	0.07173	0.07173	17	0	10	YER044C	2.36453516	12.3645352	YER044C	BUD18	3.20711051	0.00000063	20.1818182	P	P
YER045C	0.669	2.06179	0.32447	0.32447	11	8	18	YER045C	-0.24569434	9.75430566	YER045C	YER045C	3.56313936	0.00000353	81	P	P
YER099C	0.04723	1.90929	0.02474	0.02474	80	10	20	YER099C	-0.408108621	9.59189138	YER099C	PRS2	2.44692269	0.0000629	242.925926	P	P
YER100W	0.10658	1.92722	0.0553	0.0553	28	4	14	YER100W	0.012428355	10.0124284	YER100W	UBC6	2.95237297	0.00000176	646	P	P
YER115C	0.36931	1.87026	0.19747	0.19747	6	1	11	YER115C	-0.915653246	9.08434675	YER115C	YER115C	3.31544525	0.00000012	38	P	P
YER118C	0.10645	1.51393	0.07031	0.07031	73	14	24	YER118C	-0.09488108	9.90511892	YER118C	SHO1	2.71541171	0.000423	104.709677	P	P
YER119C	0.1876	1.81159	0.10356	0.10356	10	2	12	YER119C	-0.634328511	9.36567149	YER119C	YER119C	2.9788697	0	1145	P	P
YER124C	0.2743	1.87156	0.14656	0.14656	8	1	11	YER124C	-0.14708567	9.85291433	YER124C	YER124C	3.18262619	0.00000659	170.5	P	P
YER126C	0.01974	1.28487	0.01537	0.01537	43	6	16	YER126C	1.55826427	11.5582643	YER126C	NSA2	2.5512326	0.000077	140.521739	P	P
YER130C	0.23719	2.23732	0.10602	0.10602	8	17	27	YER130C	-0.23409332	9.76590668	YER130C	YER130C	4.08871373	0	32	P	P
YER136W	0.02205	1.46472	0.01505	0.01505	17	1	11	YER136W	0.679487005	10.679487	YER136W	GDI1	3.21532786	0.00000079	19.1428571	P	P
YER145C	0.06894	1.55352	0.04437	0.04437	67	21	31	YER145C	0.74039236	10.7403924	YER145C	YER145C	3.04444072	0.0000218	51.9473684	P	P
YER146W	0.06123	1.08392	0.05649	0.05649	62	14	24	YER146W	-0.654630296	9.3453697	YER146W	YER146W	2.42964951	0.000127	223.83871	P	P
YER150W	0.2212	1.86086	0.11887	0.11887	11	14	24	YER150W	0.621481905	10.6214819	YER150W	YER150W	2.99714909	0.00000027	300.666667	P	P
YER167W	0.19985	1.80511	0.11071	0.11071	20	2	12	YER167W	-0.367505051	9.63249495	YER167W	BCK2	2.76857287	0.00000003	552.75	P	P
YER174C	0.16506	1.75901	0.09384	0.09384	29	12	22	YER174C	-0.434210916	9.56578908	YER174C	GRX4	2.65688412	0.000206	306.545455	P	P
YFL004W	0.10499	1.52477	0.06886	0.06886	24	4	14	YFL004W	0.42136431	10.4213643	YFL004W	YFL004W	2.78634915	0.00000647	439.4	P	P
YFL038C	0.00433	1.57815	0.00275	0.00275	130	12	-0.378784728	YFL038C	0.476469155	10.4764692	YFL038C	YPT1	3.23595506	0.0000066	93.3333333	P	P
YFL040W	0.12034	1.99558	0.0603	0.0603	3	1	11	YFL040W	-0.709735141	9.29026486	YFL040W	YFL040W	3.39409693	0	263	P	P
YFL045C	0.05954	1.1804	0.05044	0.05044	33	2	12	YFL045C	3.75955782	13.7595578	YFL045C	YFL045C	2.57403991	0.0000108	278.652174	P	P
YFL047W	0.12122	2.01593	0.06013	0.06013	16	0	10	YFL047W	-0.15868669	9.84131331	YFL047W	YFL047W	2.82156633	0.00026	125.428571	P	P
YFL048C	0.21606	2.11342	0.10223	0.10223	56	0	10	YFL048C	0.482269665	10.4822697	YFL048C	EMP47	2.69864162	0.000345	191.941177	P	P
YFL050C	0.45706	2.21907	0.20597	0.20597	26	15	25	YFL050C	-0.471914231	9.52808577	YFL050C	YFL050C	3.20090558	0	387	P	P
YFR001W	0.12269	1.84717	0.06642	0.06642	93	27	37	YFR001W	0.16614187	10.1661419	YFR001W	LOC1	2.75163508	0.0000621	102.42029	P	P
YFR002W	0.09639	1.82254	0.05289	0.05289	53	5	15	YFR002W	-0.068778785	9.93122122	YFR002W	NIC96	2.59852423	0.0000243	162.222222	P	P
YFR003C	0.19765	1.62041	0.12198	0.12198	15	9	19	YFR003C	-0.663331061	9.33666894	YFR003C	YFR003C	3.00469562	0.000346	56.875	P	P
YFR027W	0.17612	1.76601	0.09973	0.09973	18	0	10	YFR027W	-1.14187314	8.85812686	YFR027W	ECO1	3.11353346	0.00000531	108.75	P	P
YFR041C	0.23454	2.02266	0.11595	0.11595	3	3	13	YFR041C	-0.13548465	9.86451535	YFR041C	ERJ5	2.368271	0.0002	100.109375	P	P
YFR043C	0.4247	2.50308	0.16967	0.16967	6	5	15	YFR043C	-0.457412956	9.54258704	YFR043C	YFR043C	3.0823411	0	395	P	P
YFR044C	0.06657	1.60938	0.04137	0.04137	11	1	11	YFR044C	1.65397269	11.6539727	YFR044C	DUG1	3.04544692	0.00000838	120	P	P
YFR050C	0.06331	1.61901	0.03911	0.03911	38	0	10	YFR050C	-0.13548465	9.86451535	YFR050C	PRE4	2.92369613	0.0000185	98.5333333	P	P
YGL001C	0.06057	1.80045	0.03364	0.03364	20	1	11	YGL001C	0.57797808	10.5779781	YGL001C	YGL001C	2.55458662	0.0000824	256.304348	P	P
YGL002W	0.21907	1.69309	0.12939	0.12939	72	14	24	YGL002W	0.39236176	10.3923618	YGL002W	ERP6	3.36894181	0	59	P	P
YGL008C	0.03691	0.48499	0.0761	0.0761	95	1	11	YGL008C	5.41850368	15.4185037	YGL008C	YGL008C	3.1222539	0.00000214	168.333333	P	P
YGL015C	0.67719	2.27748	0.29734	0.29734	3	5	15	YGL015C	-0.498016526	9.50198347	YGL015C	YGL015C	3.16921013	0.0000003	161	P	P
YGL036W	0.33767	1.72864	0.19534	0.19534	4	6	16	YGL036W	-0.103581845	9.89641816	YGL036W	YGL036W	2.67197719	0.00000031	581.666667	P	P
YGL037C	0.08483	1.55468	0.05457	0.05457	15	1	11	YGL037C	1.90629487	11.9062949	YGL037C	YGL037C	2.79423109	0.00000782	226.3	P	P
YGL057C	0.46971	2.21132	0.21241	0.21241	2	5	15	YGL057C	-0.848947381	9.15105262	YGL057C	GEP7	3.29548885	0	27.5	P	P
YGL062W	0.03697	1.71237	0.02159	0.02159	30	0	10	YGL062W	1.14642806	11.1464281	YGL062W	YGL062W	2.6525239	0.00000128	491.833333	P	P
YGL065C	0.18393	2.03559	0.09036	0.09036	2	0	10	YGL065C	0.093635495	10.0936355	YGL065C	ALG2	3.26362569	0.00000505	323	P	P
YGL068W	0.13247	1.35886	0.09749	0.09749	23	14	24	YGL068W	0.905706895	10.9057069	YGL068W	MNP1	3.31041422	0.00000015	68.5	P	P
YGL081W	0.46516	1.88657	0.24656	0.24656	14	0	10	YGL081W	-0.312400206	9.6875998	YGL081W	YGL081W	3.35904746	0	292	P	P
YGL095C	0.15466	2.13528	0.07243	0.07243	14	5	15	YGL095C	-0.306599696	9.69340031	YGL095C	VPL28	2.60674157	0.0000969	271.384615	P	P
YGL096W	0.44732	2.20222	0.20312	0.20312	6	2	12	YGL096W	-0.721336161	9.27866384	YGL096W	YGL096W	3.43635754	0	18	P	P
YGL105W	0.09232	1.06276	0.08687	0.08687	69	18	28	YGL105W	2.37033567	12.3703357	YGL105W	ARC1	2.90625524	0.000648	154.636364	P	P
YGL108C	0.36051	1.97014	0.18299	0.18299	22	7	17	YGL108C	-0.628528001	9.371472	YGL108C	YGL108C	2.93442898	0.0000375	121.125	P	P
YGL110C	0.28137	2.21781	0.12687	0.12687	6	2	12	YGL110C	-0.283397655	9.71660235	YGL110C	YGL110C	3.09558947	0	754	P	P
YGL112C	0.06119	1.75748	0.03482	0.03482	133	9	-0.398408565	YGL112C	-0.190589495	9.80941051	YGL112C	YGL112C	2.39325843	0.000534	123.865546	P	P
YGL129C	0.15442	1.95287	0.07907	0.07907	31	3	13	YGL129C	-0.00207292	9.99792708	YGL129C	YGL129C	2.79842361	0.0000106	161.466667	P	P
YGL130W	0.08326	1.67723	0.04964	0.04964	27	1	11	YGL130W	-0.373305561	9.62669444	YGL130W	CEG1	2.55609592	0.00000599	221.962963	P	P
YGL153W	0.28773	1.90469	0.15107	0.15107	67	34	44	YGL153W	-0.297898931	9.70210107	YGL153W	PEX14	2.43551903	0.000508	242.517241	P	P
YGL161C	0.24588	1.95046	0.12606	0.12606	22	0	10	YGL161C	-0.402308111	9.59769189	YGL161C	YIP5	2.67164179	0.000113	318.909091	P	P
YGL166W	0.42864	1.74445	0.24572	0.24572	11	0	10	YGL166W	-0.834446106	9.16555389	YGL166W	ACE1	3.20811672	0.00000239	91.5	P	P
YGL170C	0.41675	2.38045	0.17507	0.17507	5	1	11	YGL170C	-0.564722391	9.43527761	YGL170C	SPO74	2.83229918	0.00000103	425.8	P	P
YGL172W	0.20553	1.83665	0.1119	0.1119	135	31	-0.254500433	YGL172W	-1.04906498	8.95093502	YGL172W	YGL172W	2.62401476	0.0000199	192.789474	P	P
YGL191W	0.04162	1.66841	0.02495	0.02495	10	0	10	YGL191W	0.90860715	10.9086072	YGL191W	YGL191W	3.41623344	0	14	P	P
YGL192W	0.2054	1.87671	0.10945	0.10945	4	0	10	YGL192W	-0.498016526	9.50198347	YGL192W	SPO8	3.30722791	0.000335	9.5	P	P
YGL198W	0.22476	1.97672	0.1137	0.1137	24	2	12	YGL198W	-0.912752991	9.08724701	YGL198W	YGL198W	3.26899212	0.00000147	32.75	P	P
YGL222C	0.28366	1.0417	0.27231	0.27231	4	0	10	YGL222C	-0.553121371	9.44687863	YGL222C	YGL222C	2.78316284	0.0000033	1019	P	P
YGL223C	0.39778	1.85338	0.21463	0.21463	17	1	11	YGL223C	0.047231415	10.0472314	YGL223C	COD3	2.88210632	0.00000395	153.5	P	P
YGL236C	0.16062	1.89287	0.08485	0.08485	1	0	10	YGL236C	-0.669131571	9.33086843	YGL236C	YGL236C	2.66661077	0.00000033	757.25	P	P
YGL240W	0.14461	1.84508	0.07838	0.07838	22	0	10	YGL240W	-0.840246616	9.15975338	YGL240W	DOC1	2.50763039	0.0000382	317.666667	P	P
YGL242C	0.10447	2.22904	0.04687	0.04687	7	8	18	YGL242C	0.51417247	10.5141725	YGL242C	YGL242C	3.12376321	0.00000001	201.6	P	P
YGR005C	0.04139	1.62686	0.02544	0.02544	55	14	24	YGR005C	0.3575587	10.3575587	YGR005C	TFG2	2.58930069	0.0000129	220.5	P	P
YGR009C	0.22587	2.15155	0.10498	0.10498	53	13	23	YGR009C	-0.498016526	9.50198347	YGR009C	YGR009C	2.97367097	0.000365	183.857143	P	P
YGR010W	0.03441	1.37292	0.02507	0.02507	10	1	11	YGR010W	-0.14128516	9.85871484	YGR010W	YGR010W	2.78400134	0	1019	P	P
YGR012W	0.12504	1.95855	0.06384	0.06384	18	2	12	YGR012W	-0.512517801	9.4874822	YGR012W	YGR012W	3.09575717	0.000338	135	P	P
YGR037C	0.04929	1.39607	0.0353	0.0353	25	2	12	YGR037C	2.06290864	12.0629086	YGR037C	YGR037C	3.31544525	0	76	P	P
YGR046W	0.14053	1.82217	0.07712	0.07712	2	0	10	YGR046W	-0.564722391	9.43527761	YGR046W	TAM41	2.53597183	0.00125872	127.357143	P	P
YGR048W	0.1309	2.01802	0.06486	0.06486	33	1	11	YGR048W	-0.527019076	9.47298092	YGR048W	UFD1	2.65923193	0.00000752	303.555556	P	P
YGR049W	0.10151	1.8025	0.05632	0.05632	2	0	10	YGR049W	0.314054875	10.3140549	YGR049W	SCM4	2.9592487	0	625.5	P	P
YGR058W	0.15657	1.82232	0.08592	0.08592	19	4	14	YGR058W	-0.802543301	9.1974567	YGR058W	YGR058W	3.09558947	0	754	P	P
YGR076C	0.12132	1.82118	0.06662	0.06662	10	2	12	YGR076C	-0.294998676	9.70500133	YGR076C	YGR076C	3.27687406	0.00000002	63.5	P	P
YGR077C	0.43291	1.61215	0.26853	0.26853	9	0	10	YGR077C	-0.289198165	9.71080184	YGR077C	PEX8	2.80395774	0.000201	127.75	P	P
YGR082W	0.03753	1.26941	0.02956	0.02956	23	2	12	YGR082W	0.957911485	10.9579115	YGR082W	MOM19	2.57873554	0.000327	319	P	P
YGR093W	0.32067	1.98703	0.16138	0.16138	0	0	10	YGR093W	-0.512517801	9.4874822	YGR093W	DRN1	2.6934429	0.0000209	653.5	P	P
YGR105W	0.13157	1.60158	0.08215	0.08215	28	4	14	YGR105W	0.1835434	10.1835434	YGR105W	VMA21	3.2037565	0.00000001	122.5	P	P
YGR113W	0.2262	1.82339	0.12405	0.12405	47	5	15	YGR113W	-0.698134121	9.30186588	YGR113W	YGR113W	2.64162334	0.0000105	272	P	P
YGR120C	0.18252	1.7901	0.10196	0.10196	52	17	27	YGR120C	-0.324001226	9.67599878	YGR120C	SEC35	3.1232601	0.00000939	29.8823529	P	P
YGR131W	0.2198	1.75515	0.12523	0.12523	10	0	10	YGR131W	-0.703934631	9.29606537	YGR131W	YGR131W	3.08904914	0.00000133	218	P	P
YGR132C	0.0515	1.74752	0.02947	0.02947	38	3	13	YGR132C	0.40976329	10.4097633	YGR132C	PHB1	2.49622673	0.0000139	393.611111	P	P
YGR149W	0.11615	1.94754	0.05964	0.05964	4	1	11	YGR149W	-0.26889638	9.73110362	YGR149W	YGR149W	2.64497736	0.000382	313	P	P
YGR157W	0.15945	1.99866	0.07978	0.07978	4	0	10	YGR157W	0.23574799	10.235748	YGR157W	YGR157W	3.04963944	0	715	P	P
YGR167W	0.19914	1.9226	0.10358	0.10358	74	26	36	YGR167W	0.67078624	10.6707862	YGR167W	YGR167W	2.46184806	0.000033	293.84	P	P
YGR168C	0.49794	1.81625	0.27416	0.27416	6	2	12	YGR168C	-0.718435906	9.28156409	YGR168C	YGR168C	3.04393762	0.00000233	371	P	P
YGR212W	0.47738	2.08331	0.22915	0.22915	0	0	10	YGR212W	-0.355904031	9.64409597	YGR212W	YGR212W	3.04779473	0	381.5	P	P
YGR215W	0.09823	1.85751	0.05288	0.05288	29	2	12	YGR215W	-0.822845086	9.17715491	YGR215W	YGR215W	3.08753983	0.00000021	113.166667	P	P
YGR222W	0.41055	2.06286	0.19902	0.19902	6	1	11	YGR222W	-0.788042026	9.21195797	YGR222W	YGR222W	3.20090558	0	387	P	P
YGR239C	0.46053	1.51957	0.30306	0.30306	9	10	20	YGR239C	-0.553121371	9.44687863	YGR239C	YGR239C	3.04712393	0.0000107	164.4	P	P
YGR244C	0.08088	1.66953	0.04845	0.04845	5	0	10	YGR244C	0.337256915	10.3372569	YGR244C	LSC2	3.02414892	0	355.666667	P	P
YGR247W	0.1276	2.07202	0.06158	0.06158	2	0	10	YGR247W	-0.744538201	9.2554618	YGR247W	CPD1	4.01173906	0	19	P	P
YGR249W	0.25334	2.02564	0.12507	0.12507	34	11	21	YGR249W	-0.587924431	9.41207557	YGR249W	YGR249W	3.09558947	0	754	P	P
YGR250C	0.1939	2.08891	0.09283	0.09283	36	7	17	YGR250C	-0.376205816	9.62379419	YGR250C	YGR250C	2.5512326	0.00000389	308.263158	P	P
YGR253C	0.02669	1.35931	0.01963	0.01963	65	4	14	YGR253C	0.03273014	10.0327301	YGR253C	PUP2	2.67935603	0.00000142	443.285714	P	P
YHL003C	0.09508	1.77486	0.05357	0.05357	63	7	17	YHL003C	0.08493473	10.0849347	YHL003C	YHL003C	2.5716921	0.000054	262.4375	P	P
YHL015W	0.00433	0.25437	0.01703	0.01703	57	4	14	YHL015W	6.58730644	16.5873064	YHL015W	URP2	2.68120074	0.0000137	208.380952	P	P
YHL016C	0.07218	1.67113	0.04319	0.04319	17	6	16	YHL016C	0.22994748	10.2299475	YHL016C	DUR3	2.95354687	0.00000365	153.4	P	P
YHL022C	0.29739	1.89377	0.15704	0.15704	6	0	10	YHL022C	-0.303699441	9.69630056	YHL022C	SPO11	3.34160657	0	49	P	P
YHL031C	0.04143	1.85114	0.02238	0.02238	26	5	15	YHL031C	-0.718435906	9.28156409	YHL031C	GOS1	3.04460842	0.000032	122.666667	P	P
YHL036W	0.11555	1.8037	0.06406	0.06406	3	5	15	YHL036W	-0.680732591	9.31926741	YHL036W	YHL036W	2.9788697	0	1145	P	P
YHL038C	0.35996	2.06229	0.17454	0.17454	3	0	10	YHL038C	-0.326901481	9.67309852	YHL038C	YHL038C	3.10028509	0.00000002	294	P	P
YHR005C	0.1026	1.6277	0.06303	0.06303	29	4	14	YHR005C	-0.28629791	9.71370209	YHR005C	YHR005C	2.88982056	0.0000147	134.153846	P	P
YHR006W	0.35669	1.69491	0.21045	0.21045	4	3	13	YHR006W	-0.753238966	9.24676103	YHR006W	STP2	3.04695623	0.0000304	194.75	P	P
YHR019C	0.08565	1.37019	0.06251	0.06251	46	0	10	YHR019C	2.35293414	12.3529341	YHR019C	DED81	2.52171726	0.0000478	180.37931	P	P
YHR026W	0.03151	0.63576	0.04956	0.04956	49	1	11	YHR026W	1.15512883	11.1551288	YHR026W	VMA16	3.88663424	0	52	P	P
YHR046C	0.11028	2.45606	0.0449	0.0449	5	1	11	YHR046C	-0.132584395	9.86741561	YHR046C	YHR046C	2.85477109	0	930	P	P
YHR058C	0.12917	2.16261	0.05973	0.05973	32	7	17	YHR058C	-0.12388363	9.87611637	YHR058C	YHR058C	2.45732014	0.00000891	253.75	P	P
YHR059W	0.27812	1.9517	0.1425	0.1425	6	0	10	YHR059W	-0.23989383	9.76010617	YHR059W	FYV4	3.2042596	0.00000026	61	P	P
YHR060W	0.36245	2.11853	0.17109	0.17109	21	9	19	YHR060W	-0.14708567	9.85291433	YHR060W	YHR060W	3.30739561	0.00000077	35.3333333	P	P
YHR065C	0.08949	1.92633	0.04646	0.04646	148	56	-0.090968466	YHR065C	0.49097043	10.4909704	YHR065C	RRP3	3.06875734	0	218.5	P	P
YHR075C	0.28009	1.89955	0.14745	0.14745	7	0	10	YHR075C	-0.556021626	9.44397837	YHR075C	PPE1	3.11219185	0.00000073	247.5	P	P
YHR076W	0.16494	1.90078	0.08678	0.08678	13	2	12	YHR076W	-0.103581845	9.89641816	YHR076W	YHR076W	3.33942646	0	12	P	P
YHR078W	0.17158	1.60054	0.1072	0.1072	4	0	10	YHR078W	-0.576323411	9.42367659	YHR078W	YHR078W	4.13147744	0	21	P	P
YHR091C	0.28812	1.95801	0.14715	0.14715	10	1	11	YHR091C	-0.712635396	9.2873646	YHR091C	MSR1	3.07412376	0.0000019	426.5	P	P
YHR096C	0.06861	1.27099	0.05398	0.05398	137	19	-0.332995778	YHR096C	0.725891085	10.7258911	YHR096C	HXT5	2.83414389	0.0000119	602.666667	P	P
YHR100C	0.14116	1.63882	0.08613	0.08613	5	0	10	YHR100C	-0.254395105	9.7456049	YHR100C	GEP4	3.67449271	0	225	P	P
YHR103W	0.24518	1.951	0.12567	0.12567	9	2	12	YHR103W	-0.20509077	9.79490923	YHR103W	YHR103W	2.95807479	0	684.5	P	P
YHR105W	0.2394	1.72562	0.13874	0.13874	24	6	16	YHR105W	-0.863448656	9.13655134	YHR105W	YPT35	2.47291632	0.000935	203.666667	P	P
YHR110W	0.22155	1.89798	0.11673	0.11673	71	32	42	YHR110W	-0.492216016	9.50778398	YHR110W	ERP5	2.97216166	0.00000529	190.285714	P	P
YHR112C	0.08099	1.75942	0.04603	0.04603	15	1	11	YHR112C	0.03853065	10.0385307	YHR112C	YHR112C	2.96612443	0.0000527	109.909091	P	P
YHR132W-A	0.014	1.64234	0.00853	0.00853	37	0	10	YHR132W-A	-0.338502501	9.6614975	YHR132W-A	IGO2	3.01039745	0	806	P	P
YHR134W	0.27996	1.93074	0.145	0.145	18	3	13	YHR134W	-0.698134121	9.30186588	YHR134W	WSS1	3.01794399	0.00000095	258.333333	P	P
YHR153C	0.48926	2.08964	0.23414	0.23414	2	8	18	YHR153C	-0.506717291	9.49328271	YHR153C	SPO16	3.01039745	0	806	P	P
YHR154W	0.39671	1.96626	0.20176	0.20176	46	1	11	YHR154W	-0.338502501	9.6614975	YHR154W	RTT107	3.04980714	0.00000398	166.75	P	P
YHR156C	0.56356	2.55187	0.22084	0.22084	28	11	21	YHR156C	-0.12968414	9.87031586	YHR156C	LIN1	2.90927386	0.00000448	293.2	P	P
YHR166C	0.08911	1.6804	0.05303	0.05303	25	0	10	YHR166C	-0.611126471	9.38887353	YHR166C	CDC23	2.50545028	0.000166	244.052632	P	P
YHR171W	0.22167	1.83647	0.1207	0.1207	8	0	10	YHR171W	-0.440011426	9.55998857	YHR171W	APG7	2.88847895	0.0000373	239.166667	P	P
YHR182W	0.50623	1.99062	0.25431	0.25431	14	2	12	YHR182W	-0.500916781	9.49908322	YHR182W	YHR182W	2.8170384	0.00000284	376	P	P
YHR184W	0.21613	2.41637	0.08944	0.08944	8	9	19	YHR184W	-0.27469689	9.72530311	YHR184W	SSP1	3.28374979	0.00000018	38.3333333	P	P
YHR188C	0.16962	1.61724	0.10489	0.10489	17	0	10	YHR188C	-0.09488108	9.90511892	YHR188C	YHR188C	2.58846218	0.0000273	326.3	P	P
YHR195W	0.41335	1.89987	0.21757	0.21757	17	2	12	YHR195W	-0.538620096	9.4613799	YHR195W	VAB36	3.27586785	0.00000002	24	P	P
YIL003W	0.09494	1.8897	0.05024	0.05024	10	0	10	YIL003W	-0.451612446	9.54838755	YIL003W	YIL003W	2.75633071	0.00000132	623	P	P
YIL006W	0.14056	1.43923	0.09766	0.09766	7	0	10	YIL006W	-1.01136166	8.98863834	YIL006W	NDT1	3.04963944	0	715	P	P
YIL007C	0.22777	1.76062	0.12937	0.12937	27	12	22	YIL007C	-0.677832336	9.32216766	YIL007C	NAS2	3.01458997	0.000023	122.714286	P	P
YIL062C	0.10566	1.16316	0.09084	0.09084	20	0	10	YIL062C	-0.289198165	9.71080184	YIL062C	YIL062C	2.90239812	0.0000506	112.26087	P	P
YIL067C	0.1513	1.81497	0.08336	0.08336	1	0	10	YIL067C	-0.776441006	9.22355899	YIL067C	YIL067C	3.23947677	0	118	P	P
YIL085C	0.21892	1.83256	0.11946	0.11946	5	12	22	YIL085C	-0.010773685	9.98922632	YIL085C	YIL085C	3.05467047	0.0000331	242.666667	P	P
YIL093C	0.15536	1.37503	0.11299	0.11299	29	0	10	YIL093C	-0.471914231	9.52808577	YIL093C	RSM25	2.52305886	0.0000361	323.692308	P	P
YIL098C	0.24353	1.975	0.12331	0.12331	10	9	19	YIL098C	-0.24569434	9.75430566	YIL098C	YIL098C	2.78265974	0.00000073	1018.5	P	P
YIL105C	0.0788	1.66429	0.04734	0.04734	113	30	-0.261041712	YIL105C	-0.390707091	9.60929291	YIL105C	LIT2	3.05718598	0.00000748	74.4375	P	P
YIL114C	0.29762	2.2389	0.13293	0.13293	104	12	-0.378784728	YIL114C	-0.561822136	9.43817786	YIL114C	YIL114C	3.0808318	0	817	P	P
YIL134W	0.1966	1.7563	0.11194	0.11194	4	6	16	YIL134W	-0.805443556	9.19455644	YIL134W	YIL134W	3.27251384	0.00000036	66.5	P	P
YIL139C	0.17337	1.64649	0.10529	0.10529	8	6	16	YIL139C	-0.039776235	9.96022377	YIL139C	REV7	3.8982056	0	23	P	P
YIL152W	0.30551	1.59295	0.19179	0.19179	18	13	23	YIL152W	-1.17087569	8.82912431	YIL152W	YIL152W	3.25943317	0.00000019	38.3333333	P	P
YIR005W	0.24202	2.52678	0.09578	0.09578	31	15	25	YIR005W	-0.988159621	9.01184038	YIR005W	YIR005W	2.87120577	0.00000262	213.75	P	P
YIR013C	0.22927	2.07229	0.11063	0.11063	0	1	11	YIR013C	-0.355904031	9.64409597	YIR013C	YIR013C	3.09122925	0	527	P	P
YIR025W	0.30117	2.18071	0.13811	0.13811	28	14	24	YIR025W	-0.962057326	9.03794267	YIR025W	YIR025W	3.0610431	0.00000335	45	P	P
YIR026C	0.09694	1.74425	0.05558	0.05558	27	2	12	YIR026C	0.006627845	10.0066279	YIR026C	YIR026C	2.898541	0.0000504	353.5	P	P
YIR028W	0.07743	1.4966	0.05174	0.05174	15	3	13	YIR028W	0.34595768	10.3459577	YIR028W	YIR028W	3.27687406	0	611	P	P
YIR031C	0.07071	1.67059	0.04232	0.04232	24	2	12	YIR031C	0.778095675	10.7780957	YIR031C	YIR031C	3.33020292	0	61	P	P
YIR032C	0.26163	1.53356	0.1706	0.1706	2	0	10	YIR032C	-1.03746396	8.96253604	YIR032C	YIR032C	2.76572195	0.00000016	727	P	P
YIR034C	0.05803	1.26307	0.04594	0.04594	16	2	12	YIR034C	0.44456635	10.4445664	YIR034C	YIR034C	2.48733859	0.00000648	347.095238	P	P
YIR037W	0.08578	1.7225	0.0498	0.0498	41	0	10	YIR037W	0.870903835	10.8709038	YIR037W	ORP1	3.01442227	0.0000272	178.875	P	P
YJL003W	0.07373	1.49636	0.04927	0.04927	1	0	10	YJL003W	-0.895351461	9.10464854	YJL003W	COX16	2.9788697	0	1145	P	P
YJL010C	0.11864	1.65118	0.07185	0.07185	57	11	21	YJL010C	0.14874034	10.1487403	YJL010C	YJL010C	2.76773436	0.00014	75.7441861	P	P
YJL048C	0.22846	2.02183	0.11299	0.11299	8	2	12	YJL048C	-0.573423156	9.42657684	YJL048C	UBX6	2.95656549	0.00000746	310.5	P	P
YJL063C	0.20058	1.68869	0.11878	0.11878	25	0	10	YJL063C	-1.16217492	8.83782508	YJL063C	YJL063C	2.66459836	0.00000129	236.923077	P	P
YJL085W	0.0698	1.78782	0.03904	0.03904	11	4	14	YJL085W	-0.18188873	9.81811127	YJL085W	EXO70	2.86667785	0.00000418	136.454546	P	P
YJL091C	0.24277	1.61187	0.15062	0.15062	22	3	13	YJL091C	-0.361704541	9.63829546	YJL091C	YJL091C	2.66308905	0.000143	170.047619	P	P
YJL116C	0.14287	2.38417	0.05992	0.05992	16	1	11	YJL116C	0.9956148	10.9956148	YJL116C	NCA3	3.38386718	0	235	P	P
YJL121C	0.05472	1.42753	0.03833	0.03833	1	0	10	YJL121C	1.22183469	11.2218347	YJL121C	EPI1	3.1628375	0	373.5	P	P
YJL133W	0.05593	1.35934	0.04114	0.04114	5	4	14	YJL133W	-1.05776574	8.94223426	YJL133W	MRS3	3.23629046	0	74.3333333	P	P
YJL140W	0.03251	1.6773	0.01938	0.01938	52	8	18	YJL140W	-0.213791535	9.78620847	YJL140W	YJL140W	2.5099782	0.0000566	219.15	P	P
YJL143W	0.02664	1.3166	0.02024	0.02024	20	0	10	YJL143W	0.528673745	10.5286738	YJL143W	YJL143W	3.3464699	0.00000063	15.25	P	P
YJL158C	0.13507	1.1859	0.1139	0.1139	12	1	11	YJL158C	4.34250907	14.3425091	YJL158C	CCW5	3.51752474	0	97	P	P
YJL178C	0.27177	1.57483	0.17257	0.17257	45	2	12	YJL178C	0.14874034	10.1487403	YJL178C	ATG27	3.1432165	0.00000088	83.1666667	P	P
YJL185C	0.30569	1.83498	0.16659	0.16659	6	0	10	YJL185C	-0.811244066	9.18875593	YJL185C	YJL185C	3.90709374	0	12	P	P
YJL192C	0.17176	1.78337	0.09631	0.09631	16	0	10	YJL192C	-0.22829281	9.77170719	YJL192C	YJL192C	2.91614959	0.00000342	177	P	P
YJL208C	0.12496	1.90566	0.06558	0.06558	22	0	10	YJL208C	-0.219592045	9.78040796	YJL208C	NUC1	2.67063559	0.00000019	533	P	P
YJR042W	0.18372	1.59021	0.11553	0.11553	25	1	11	YJR042W	-0.18188873	9.81811127	YJR042W	YJR042W	3.09726648	0.00000271	40	P	P
YJR050W	0.22341	2.04594	0.1092	0.1092	18	9	19	YJR050W	-0.834446106	9.16555389	YJR050W	ISY1	2.7353681	0.00000863	193.375	P	P
YJR076C	0.05582	1.56005	0.03578	0.03578	118	39	-0.202170204	YJR076C	0.11393728	10.1139373	YJR076C	CDC11	2.62217005	0.00000829	244.733333	P	P
YJR083C	0.32574	2.19259	0.14856	0.14856	34	13	23	YJR083C	-0.744538201	9.2554618	YJR083C	YJR083C	2.60288445	0.000023	515.25	P	P
YJR084W	0.20071	1.67793	0.11962	0.11962	13	0	10	YJR084W	-0.767740241	9.23225976	YJR084W	YJR084W	2.42277377	0.0000296	169.441177	P	P
YJR090C	0.10966	1.88893	0.05806	0.05806	44	5	15	YJR090C	-0.576323411	9.42367659	YJR090C	CAT80	3.05584437	0.00000505	132.666667	P	P
YJR097W	0.23787	1.9233	0.12368	0.12368	15	13	23	YJR097W	-0.376205816	9.62379419	YJR097W	YJR097W	2.82844206	0.00013	43.9016393	P	P
YJR100C	0.20218	2.09706	0.09641	0.09641	2	2	12	YJR100C	-0.712635396	9.2873646	YJR100C	YJR100C	3.32500419	0.00000178	142	P	P
YJR102C	0.21215	1.89991	0.11166	0.11166	7	3	13	YJR102C	-0.297898931	9.70210107	YJR102C	YJR102C	2.77377159	0.0000488	264.125	P	P
YJR113C	0.17404	1.78721	0.09738	0.09738	28	0	10	YJR113C	-0.721336161	9.27866384	YJR113C	YJR113C	2.84236123	0.0000109	148.8	P	P
YJR118C	0.22912	1.63568	0.14007	0.14007	18	11	21	YJR118C	0.482269665	10.4822697	YJR118C	ILM1	2.78819386	0.0000255	331.714286	P	P
YJR122W	0.40423	1.94486	0.20785	0.20785	8	1	11	YJR122W	-0.376205816	9.62379419	YJR122W	CAF17	2.7964112	0.00000094	321.545455	P	P
YJR123W	0.00642	0.16655	0.03855	0.03855	134	11	-0.385326007	YJR123W	6.26537814	16.2653781	YJR123W	RPS5	2.4284756	0.0000764	134.944444	P	P
YJR124C	0.08811	1.64187	0.05366	0.05366	2	0	10	YJR124C	-0.196390005	9.80361	YJR124C	YJR124C	2.90306893	0.00000025	442.25	P	P
YJR125C	0.21441	1.9648	0.10912	0.10912	25	6	16	YJR125C	0.17194238	10.1719424	YJR125C	ENT3	2.71826262	0.0000114	378.222222	P	P
YJR126C	0.16226	2.00504	0.08093	0.08093	6	0	10	YJR126C	-0.498016526	9.50198347	YJR126C	VPS70	3.16468221	0	436	P	P
YJR144W	0.20013	1.62139	0.12343	0.12343	31	1	11	YJR144W	-0.277597145	9.72240286	YJR144W	MGM9	3.06976354	0.00000064	129	P	P
YJR147W	0.42259	1.99635	0.21168	0.21168	30	8	18	YJR147W	-0.698134121	9.30186588	YJR147W	HMS2	2.87237967	0.00000018	835.5	P	P
YKL003C	0.07118	1.68333	0.04229	0.04229	11	4	14	YKL003C	-0.582123921	9.41787608	YKL003C	YKL003C	3.05534127	0.00000425	106.5	P	P
YKL007W	0.2039	1.96125	0.10396	0.10396	18	2	12	YKL007W	0.116837535	10.1168375	YKL007W	CAP1	2.90675834	0.00000277	173.916667	P	P
YKL013C	0.00866	1.3942	0.00621	0.00621	16	1	11	YKL013C	-0.20509077	9.79490923	YKL013C	ARC19	3.07362066	0.00000796	117.307692	P	P
YKL019W	0.23571	1.71771	0.13722	0.13722	3	0	10	YKL019W	-0.12388363	9.87611637	YKL019W	YKL019W	3.01308066	0.00000268	98.875	P	P
YKL029C	0.05703	1.61751	0.03526	0.03526	72	4	14	YKL029C	0.540274765	10.5402748	YKL029C	MAE1	2.64849908	0.0000383	138.774648	P	P
YKL034W	0.10533	1.77146	0.05946	0.05946	5	2	12	YKL034W	-0.350103521	9.64989648	YKL034W	TUL1	3.22941472	0.00000956	77.5	P	P
YKL040C	0.13007	2.06904	0.06287	0.06287	2	0	10	YKL040C	0.047231415	10.0472314	YKL040C	NFU1	3.94700654	0	15	P	P
YKL046C	0.04767	1.57401	0.03029	0.03029	17	0	10	YKL046C	0.79259695	10.792597	YKL046C	YKL046C	3.17139024	0.00000012	95.75	P	P
YKL049C	0.149	2.51026	0.05936	0.05936	768	419	2.2835157	YKL049C	-0.640129021	9.35987098	YKL049C	CSE4	2.9792051	0.0000116	167.285714	P	P
YKL058W	0.01501	1.62	0.00927	0.00927	16	0	10	YKL058W	-0.480614996	9.519385	YKL058W	YKL058W	2.98272682	0.00000763	141.7	P	P
YKL073W	0.26317	1.97585	0.13319	0.13319	47	12	22	YKL073W	-0.138384905	9.8616151	YKL073W	LHS1	2.36961261	0.0000907	117	P	P
YKL084W	0.26859	2.2039	0.12187	0.12187	3	0	10	YKL084W	-0.26889638	9.73110362	YKL084W	HOT13	3.27687406	0	611	P	P
YKL090W	0.36796	1.87093	0.19667	0.19667	4	4	14	YKL090W	-0.396507601	9.6034924	YKL090W	CUE2	3.24383699	0	120	P	P
YKL138C	0.11715	1.79658	0.06521	0.06521	4	0	10	YKL138C	0.412663545	10.4126636	YKL138C	YKL138C	3.30907261	0	75	P	P
YKL148C	0.03848	1.50818	0.02552	0.02552	8	0	10	YKL148C	0.940509955	10.94051	YKL148C	YKL148C	2.80295153	0.0000267	365.5	P	P
YKL149C	0.27474	2.34291	0.11727	0.11727	2	1	11	YKL149C	-0.321100971	9.67889903	YKL149C	DBR1	3.09458326	0.0000022	379	P	P
YKL167C	0.20456	1.87925	0.10885	0.10885	29	7	17	YKL167C	-0.28629791	9.71370209	YKL167C	MRP49	3.24383699	0	52.4	P	P
YKL168C	0.34674	2.14768	0.16145	0.16145	87	36	46	YKL168C	-0.611126471	9.38887353	YKL168C	KKQ8	2.59634412	0.00000023	552.285714	P	P
YKL172W	0.21837	1.88553	0.11581	0.11581	179	63	-0.045179515	YKL172W	1.23343571	11.2334357	YKL172W	YKL172W	2.41807815	0.0000267	180.916667	P	P
YKL178C	0.17858	2.03991	0.08754	0.08754	11	2	12	YKL178C	-0.300799186	9.69920082	YKL178C	YKL178C	3.29934597	0	24	P	P
YKL183W	0.15382	1.24088	0.12396	0.12396	2	0	10	YKL183W	-0.616926981	9.38307302	YKL183W	LOT5	3.3270166	0.00000003	24	P	P
YKL185W	0.17779	1.61429	0.11014	0.11014	32	6	16	YKL185W	-0.698134121	9.30186588	YKL185W	ASH1	2.49756834	0.0000233	414.333333	P	P
YKL187C	0.21995	1.86961	0.11765	0.11765	29	5	15	YKL187C	-0.161586945	9.83841306	YKL187C	YKL187C	3.27687406	0	611	P	P
YKL188C	0.15746	2.0109	0.0783	0.0783	4	5	15	YKL188C	-0.579223666	9.42077633	YKL188C	YKL188C	4.39359383	0	2	P	P
YKL194C	0.13557	1.96265	0.06908	0.06908	27	2	12	YKL194C	0.16614187	10.1661419	YKL194C	MST1	3.12476941	0.000335	263.5	P	P
YKR006C	0.36434	1.60907	0.22643	0.22643	27	14	24	YKR006C	-0.126783885	9.87321612	YKR006C	YKR006C	2.89451618	0.0000136	140.230769	P	P
YKR007W	0.28972	1.76314	0.16432	0.16432	33	28	38	YKR007W	-1.04326447	8.95673553	YKR007W	YKR007W	3.34278048	0	80	P	P
YKR017C	0.09886	1.70608	0.05795	0.05795	8	2	12	YKR017C	-0.17608822	9.82391178	YKR017C	HEL1	3.33187993	0	23	P	P
YKR022C	0.48092	2.46013	0.19549	0.19549	62	22	32	YKR022C	-0.437111171	9.56288883	YKR022C	NTR2	2.87388898	0.0000987	97.1	P	P
YKR042W	0.09882	1.53029	0.06457	0.06457	16	0	10	YKR042W	2.73866806	12.7386681	YKR042W	YKR042W	2.9788697	0	1145	P	P
YKR055W	0.20851	1.94168	0.10739	0.10739	28	17	27	YKR055W	-0.834446106	9.16555389	YKR055W	YKR055W	3.715244	0	31	P	P
YKR060W	0.18484	1.75972	0.10504	0.10504	28	1	11	YKR060W	-0.1644872	9.8355128	YKR060W	UTP30	3.00754654	0.00000513	86.7647059	P	P
YKR061W	0.17059	1.69794	0.10047	0.10047	40	10	20	YKR061W	-0.390707091	9.60929291	YKR061W	KTR2	3.46184806	0	19	P	P
YKR064W	0.29436	2.10335	0.13995	0.13995	6	0	10	YKR064W	-0.408108621	9.59189138	YKR064W	YKR064W	2.97132316	0.00000258	395	P	P
YKR065C	0.21458	1.63727	0.13106	0.13106	7	6	16	YKR065C	0.09653575	10.0965358	YKR065C	YKR065C	3.25557605	0	311.5	P	P
YKR085C	0.24957	1.46169	0.17074	0.17074	22	0	10	YKR085C	-0.631428256	9.36857174	YKR085C	YKR085C	3.17491196	0.0000053	55.1111111	P	P
YKR089C	0.12294	1.93113	0.06366	0.06366	29	3	13	YKR089C	-0.599525451	9.40047455	YKR089C	YKR089C	3.17189334	0.00000093	172	P	P
YKR100C	0.20236	1.74909	0.1157	0.1157	13	4	14	YKR100C	-0.811244066	9.18875593	YKR100C	YKR100C	3.29481804	0	57	P	P
YLL028W	0.07736	1.64163	0.04712	0.04712	80	6	16	YLL028W	0.54317502	10.543175	YLL028W	TPO1	3.17357035	0.00000413	110.666667	P	P
YLL038C	0.11287	2.0847	0.05414	0.05414	7	10	20	YLL038C	-1.11577084	8.88422916	YLL038C	YLL038C	3.09139695	0.00000895	387.5	P	P
YLR003C	0.23924	1.77982	0.13442	0.13442	32	8	18	YLR003C	-0.326901481	9.67309852	YLR003C	CMS1	2.83934261	0.0000513	120.75	P	P
YLR008C	0.12281	1.78903	0.06864	0.06864	18	0	10	YLR008C	-0.271796635	9.72820337	YLR008C	PAM18	3.11269495	0.000392	16.2222222	P	P
YLR009W	0.02291	1.01467	0.02258	0.02258	72	15	25	YLR009W	2.21082165	12.2108217	YLR009W	YLR009W	2.96679524	0.0000442	110.4375	P	P
YLR013W	0.42799	1.92673	0.22213	0.22213	0	1	11	YLR013W	-0.538620096	9.4613799	YLR013W	YLR013W	3.17491196	0	319	P	P
YLR021W	0.2946	1.72173	0.1711	0.1711	11	5	15	YLR021W	-0.396507601	9.6034924	YLR021W	YLR021W	3.23343954	0.00000385	96.6666667	P	P
YLR091W	0.35098	1.63453	0.21473	0.21473	4	0	10	YLR091W	-0.759039476	9.24096052	YLR091W	GEP5	3.39409693	0	263	P	P
YLR092W	0.12082	1.86778	0.06469	0.06469	3	0	10	YLR092W	0.36335921	10.3633592	YLR092W	YLR092W	3.02247191	0.00000929	206	P	P
YLR223C	0.18889	2.71134	0.06967	0.06967	54	11	21	YLR223C	-0.2804974	9.7195026	YLR223C	IFH1	3.12711722	0.00100618	41.1666667	P	P
YLR251W	0.12822	1.71085	0.07495	0.07495	3	0	10	YLR251W	-0.138384905	9.8616151	YLR251W	SYM1	3.27687406	0	611	P	P
YLR253W	0.09783	1.81089	0.05402	0.05402	1	0	10	YLR253W	-0.544420606	9.45557939	YLR253W	YLR253W	3.14925373	0.00000042	133	P	P
YLR260W	0.17235	1.94201	0.08875	0.08875	4	0	10	YLR260W	-0.553121371	9.44687863	YLR260W	LCB5	3.01710548	0	481.5	P	P
[truncated: 210 more rows]
